# Supplementary material
Source: publisher figshare collection journal article supplement (https://diabetesjournals.figshare.com/articles/dataset/_/14888034)
Supplement: Supplementary file 1 [file 1]

|                    | Category | Term                                                                                      | Count | PValue | Genes                                                                                                                                                                                       |
|--------------------|----------|-------------------------------------------------------------------------------------------|-------|--------|---------------------------------------------------------------------------------------------------------------------------------------------------------------------------------------------|
| D1 D2-both-up-1    | GO_MF    | GO:0019904~protein domain specific binding                                                | 7     | 0.026  | PRKCI, NDE1, ACTN1, STXBP1, MYH9, IQGAP1, GAB2                                                                                                                                              |
| D1 D2-both-up-2    | GO_BP    | GO:0007015~actin filament organization                                                    | 5     | 0.033  | PRKCI, SRF, ACTN1, NCK2, EMP2                                                                                                                                                               |
| D1 D2-both-up-3    | GO_BP    | GO:0043065~positive regulation of apoptotic process                                       | 8     | 0.034  | UNC13B, MTCH1, GADD45B, PRMT2, TNFRSF12A, ANKRD1, RARB, CYR61                                                                                                                               |
| D1 D2-both-up-4    | GO_BP    | GO:0030220~platelet formation                                                             | 3     | 0.040  | SRF, ACTN1, MYH9                                                                                                                                                                            |
| D1 D2-both-up-5    | GO_MF    | GO:0032403~protein complex binding                                                        | 7     | 0.050  | MLKL, MAP1B, NCK2, RARB, ACTN4, IQGAP1, CD2AP                                                                                                                                               |
| D1 D2-both-up-6    | KEGG     | mmu04530:Tight junction                                                                   | 5     | 0.056  | PRKCI, ACTN1, MYH9, ACTN4, MYL12A                                                                                                                                                           |
| D1 D2-both-up-7    | GO_BP    | GO:0016477~cell migration                                                                 | 7     | 0.057  | PRKCI, SPECC1L, FNDC3B, NCK2, EMP2, GAB2, CD2AP                                                                                                                                             |
| D1 D2-both-up-8    | KEGG     | mmu04670:Leukocyte transendothelial migration                                             | 4     | 0.063  | NCF2, ACTN1, ACTN4, MYL12A                                                                                                                                                                  |
| D1 D2-both-up-9    | GO_MF    | GO:0019901~protein kinase binding                                                         | 6     | 0.070  | MLKL, STXBP1, CRY1, EMP2, IQGAP1, SASH1                                                                                                                                                     |
| D1 D2-both-up-10   | GO_BP    | GO:0071333~cellular response to glucose stimulus                                          | 3     | 0.073  | UNC13B, SRF, UCP2                                                                                                                                                                           |
| D1 D2-both-up-11   | GO_MF    | GO:0005543~phospholipid binding                                                           | 5     | 0.079  | PRKCI, HIP1, PLEKHA2, MAP1B, MYOF                                                                                                                                                           |
| D1-up-only-1       | KEGG     | mmu04144:Endocytosis                                                                      | 5     | 0.022  | PAR6B, EHD4, H2-Q6, KIF5B, PSD3                                                                                                                                                             |
| D1-up-only-2       | GO_BP    | GO:0098609~cell-cell adhesion                                                             | 4     | 0.045  | TMEM47, EHD4, STAT1, ELMO2                                                                                                                                                                  |
| D1-up-only-3       | GO_MF    | GO:0005525~GTP binding                                                                    | 5     | 0.061  | EHD4, RAB13, IRGM2, UPRT, RAB6B                                                                                                                                                             |
| D1-up-only-4       | KEGG     | mmu04261:Adrenergic signaling in cardiomyocytes                                           | 3     | 0.078  | CREB3L1, ATP1B2, CALM2                                                                                                                                                                      |
| D1-up-only-5       | KEGG     | mmu04728:Dopaminergic synapse                                                             | 3     | 0.100  | CREB3L1, KIF5B, CALM2                                                                                                                                                                       |
| D2-up-only-1       | GO_BP    | GO:0002062~chondrocyte differentiation                                                    | 5     | 0.027  | MUSTN1, ARID5A, SCX, FGFR1, BMPR1A                                                                                                                                                          |
| D2-up-only-2       | GO_BP    | GO:0045087~innate immune response                                                         | 7     | 0.035  | C1RA, ANXA1, IFITM2, ELF4, AXL, IL34, RELB                                                                                                                                                  |
| D2-up-only-3       | GO_BP    | GO:0045944~positive regulation of transcription from RNA polymerase II promoter           | 20    | 0.046  | JUN, ARID5A, IL18, LIF, SCX, TCF21, ARRB1, FOS, NPAS2, RELB, MLLT6, NR4A2, GDNF, ELF4, NDN, FOSB, NFE2L1, ZFP462, FGFR1, BMPR1A                                                             |
| D2-up-only-4       | KEGG     | mmu05132:Salmonella infection                                                             | 5     | 0.052  | JUN, IL18, FOS, KLC1, RAB7B                                                                                                                                                                 |
| D2-up-only-5       | GO_BP    | GO:0034097~response to cytokine                                                           | 6     | 0.054  | JUN, SPARC, ALDH1A2, TIMP2, FOS, RELB                                                                                                                                                       |
| D2-up-only-6       | GO_BP    | GO:0015031~protein transport                                                              | 10    | 0.056  | RAB3B, ARHGAP33, SEC16B, AGAP1, APBA1, ARRB1, RAB7B, STX11, VAMP2, ARF6                                                                                                                     |
| D2-up-only-7       | GO_BP    | GO:0006355~regulation of transcription, DNA-templated                                     | 28    | 0.064  | ZBTB46, RASL11A, SETD7, SCX, TCF21, ZBTB42, ARRB1, NPAS2, RELB, FOXS1, HOXC5, NDN, LRRFIP1, HOXC8, PTRF, JUN, ARID5A, FOS, WTIP, SMAD6, NR4A2, MYCL, ELF4, FOSB, VOPP1, MAFK, NUPR1, NFE2L1 |
| D2-up-only-8       | GO_BP    | GO:0010628~positive regulation of gene expression                                         | 10    | 0.072  | PTGER4, SEC16B, MUSTN1, ALDH1A2, IL18, LIF, SCX, VIM, VASH1, RELB                                                                                                                           |
| D2-up-only-9       | GO_MF    | GO:0070412~R-SMAD binding                                                                 | 4     | 0.075  | JUN, PMEPA1, FOS, SMAD6                                                                                                                                                                     |
| D2-up-only-10      | GO_BP    | GO:1902895~positive regulation of pri-miRNA transcription from RNA polymerase II promoter | 4     | 0.081  | JUN, FOS, SMAD6, BMPR1A                                                                                                                                                                     |
| D2-up-only-11      | KEGG     | mmu04350:TGF-beta signaling pathway                                                       | 4     | 0.094  | INHBB, SMAD6, NBL1, BMPR1A                                                                                                                                                                  |
| D2-up-only-12      | KEGG     | mmu05133:Pertussis                                                                        | 4     | 0.094  | ITGB1, JUN, C1RA, FOS                                                                                                                                                                       |
| D1up-D2down-1      | GO_BP    | GO:0035458~cellular response to interferon-beta                                           | 2     | 0.031  | STAT1, IRGM2                                                                                                                                                                                |
| D1up-D2down-2      | GO_BP    | GO:0002474~antigen processing and presentation of peptide antigen via MHC class I         | 2     | 0.046  | H2-Q6, H2-Q4                                                                                                                                                                                |
| D1up-D2down-3      | GO_MF    | GO:0030881~beta-2-microglobulin binding                                                   | 2     | 0.048  | H2-Q6, H2-Q4                                                                                                                                                                                |
| D1up-D2down-4      | GO_MF    | GO:0042605~peptide antigen binding                                                        | 2     | 0.048  | H2-Q6, H2-Q4                                                                                                                                                                                |
| D1up-D2down-5      | GO_MF    | GO:0046977~TAP binding                                                                    | 2     | 0.048  | H2-Q6, H2-Q4                                                                                                                                                                                |
| D1up-D2down-6      | GO_MF    | GO:0042608~T cell receptor binding                                                        | 2     | 0.064  | H2-Q6, H2-Q4                                                                                                                                                                                |
| D1up-D2down-7      | KEGG     | mmu04919:Thyroid hormone signaling pathway                                                | 2     | 0.089  | STAT1, ATP1B2                                                                                                                                                                               |
| D1 D2-both-down-1  | GO_BP    | GO:0032836~glomerular basement membrane development                                       | 4     | 0.007  | NPHS1, WT1, COL4A3, SULF1                                                                                                                                                                   |
| D1 D2-both-down-2  | GO_MF    | GO:0000981~RNA polymerase II transcription factor activity, sequence-specific DNA binding | 5     | 0.016  | FOXD2, BHLHE41, SOX8, FOXL1, SOX5                                                                                                                                                           |
| D1 D2-both-down-3  | GO_BP    | GO:0072112~glomerular visceral epithelial cell differentiation                            | 3     | 0.025  | FOXC2, WT1, PTPRO                                                                                                                                                                           |
| D1 D2-both-down-4  | GO_BP    | GO:0043010~camera-type eye development                                                    | 4     | 0.033  | FOXC2, WT1, GAS1, LMX1B                                                                                                                                                                     |
| D1 D2-both-down-5  | GO_MF    | GO:0004252~serine-type endopeptidase activity                                             | 4     | 0.035  | HTRA1, PLAT, PCSK6, RHBDL3                                                                                                                                                                  |
| D1 D2-both-down-6  | GO_BP    | GO:0048010~vascular endothelial growth factor receptor signaling pathway                  | 3     | 0.048  | FOXC2, SULF1, VEGFA                                                                                                                                                                         |
| D1 D2-both-down-7  | GO_BP    | GO:0001822~kidney development                                                             | 5     | 0.058  | FOXC2, WT1, SULF1, TNS2, VEGFA                                                                                                                                                              |
| D1 D2-both-down-8  | GO_MF    | GO:0008017~microtubule binding                                                            | 5     | 0.061  | SGIP1, MTCL1, DPYSL2, MAPT, DYNC111                                                                                                                                                         |
| D1 D2-both-down-9  | GO_BP    | GO:0007409~axonogenesis                                                                   | 4     | 0.062  | NTNG2, LINGO1, PAK1, MAPT                                                                                                                                                                   |
| D1 D2-both-down-10 | GO_MF    | GO:0003677~DNA binding                                                                    | 12    | 0.071  | FOXC2, ZBTB8A, FOXD2, ZFP423, WT1, TOP1MT, BHLHE41, SOX8, FOXL1, LMX1B, MAFA, SOX5                                                                                                          |
| D1 D2-both-down-11 | GO_BP    | GO:0010506~regulation of autophagy                                                        | 3     | 0.075  | MTCL1, MAPT, LMX1B                                                                                                                                                                          |

|                    |       |                                                                                   |    |       |                                                                                                                 |
|--------------------|-------|-----------------------------------------------------------------------------------|----|-------|-----------------------------------------------------------------------------------------------------------------|
| D1 D2-both-down-12 | GO_BP | GO:0008283~cell proliferation                                                     | 4  | 0.079 | FOXC2, COL4A3, LMX1B, VEGFA                                                                                     |
| D1 D2-both-down-13 | GO_MF | GO:0043565~sequence-specific DNA binding                                          | 8  | 0.084 | FOXC2, FOXD2, ZFP423, WT1, SOX8, FOXL1, LMX1B, MAFA                                                             |
| D1-down-only-1     | GO_BP | GO:0016567~protein ubiquitination                                                 | 4  | 0.011 | KLHL29, WSB2, UBE2QL1, KCTD11                                                                                   |
| D1-down-only-2     | GO_MF | GO:0005524~ATP binding                                                            | 8  | 0.042 | EPHA6, KSR1, TYRO3, UBE2QL1, SPEG, NOD1, TRIB2, ADCY5                                                           |
| D1-down-only-3     | GO_MF | GO:0008134~transcription factor binding                                           | 5  | 0.044 | FOXC1, E2F1, CRY1, PBX2, TRIB2                                                                                  |
| D1-down-only-4     | GO_BP | GO:0019933~cAMP-mediated signaling                                                | 3  | 0.067 | GLP1R, KSR1, ADCY5                                                                                              |
| D1-down-only-5     | GO_BP | GO:0007049~cell cycle                                                             | 5  | 0.093 | MARVELD1, E2F1, PMP22, KCTD11, VASH1                                                                            |
| D2-down-only-1     | GO_BP | GO:0007155~cell adhesion                                                          | 16 | 0.020 | COL18A1, ITGB5, LAMB2, ITGA3, AMIGO2, ATP1B2, NPNT, DPP4, ARVCF, ALCAM, FLRT2, PODXL, NCAM1, SVEP1, EPHB1, CDON |
| D2-down-only-2     | GO_BP | GO:0007411~axon guidance                                                          | 9  | 0.024 | ROBO2, SEMA5A, ALCAM, NR4A3, FLRT2, LAMB2, UNC5C, NCAM1, EPHB1                                                  |
| D2-down-only-3     | GO_BP | GO:0000187~activation of MAPK activity                                            | 4  | 0.041 | NTRK3, PLCE1, TGFA, ARRB1                                                                                       |
| D2-down-only-4     | GO_BP | GO:0006811~ion transport                                                          | 9  | 0.049 | CLIC5, GABRB1, STEAP3, CLIC3, KCNJ12, SLCO2A1, ITPR3, ATP1B2, SLC38A4                                           |
| D2-down-only-5     | GO_BP | GO:0042542~response to hydrogen peroxide                                          | 5  | 0.054 | GNAO1, NR4A3, STAT1, STK26, CRYAB                                                                               |
| D2-down-only-6     | GO_BP | GO:0051965~positive regulation of synapse assembly                                | 5  | 0.054 | LINGO2, FLRT2, NTRK3, AMIGO2, EPHB1                                                                             |
| D2-down-only-7     | GO_MF | GO:0042277~peptide binding                                                        | 5  | 0.055 | DPP4, ENPEP, H2-Q6, H2-Q7, H2-Q4                                                                                |
| D2-down-only-8     | GO_BP | GO:0001574~ganglioside biosynthetic process                                       | 4  | 0.084 | ST3GAL6, ST6GALNAC3, ST6GALNAC6, ST3GAL3                                                                        |
| D2-down-only-9     | GO_BP | GO:0019221~cytokine-mediated signaling pathway                                    | 4  | 0.084 | FLRT2, IFNGR1, STAT1, IL6RA                                                                                     |
| D2-down-only-10    | GO_MF | GO:0045499~chemorepellent activity                                                | 4  | 0.085 | SEMA5A, FLRT2, SEMA3G, SEMA3E                                                                                   |
| d1-up d2-down-1    | GO_BP | GO:0035458~cellular response to interferon-beta                                   | 2  | 0.031 | STAT1, IRGM2                                                                                                    |
| d1-up d2-down-2    | GO_BP | GO:0002474~antigen processing and presentation of peptide antigen via MHC class I | 2  | 0.046 | H2-Q6, H2-Q4                                                                                                    |
| d1-up d2-down-3    | GO_MF | GO:0030881~beta-2-microglobulin binding                                           | 2  | 0.048 | H2-Q6, H2-Q4                                                                                                    |
| d1-up d2-down-4    | GO_MF | GO:0042605~peptide antigen binding                                                | 2  | 0.048 | H2-Q6, H2-Q4                                                                                                    |
| d1-up d2-down-5    | GO_MF | GO:0046977~TAP binding                                                            | 2  | 0.048 | H2-Q6, H2-Q4                                                                                                    |
| d1-up d2-down-6    | GO_MF | GO:0042608~T cell receptor binding                                                | 2  | 0.064 | H2-Q6, H2-Q4                                                                                                    |
| d1-up d2-down-7    | KEGG  | mmu04919:Thyroid hormone signaling pathway                                        | 2  | 0.089 | STAT1, ATP1B2                                                                                                   |
