# Supplementary material
Source: publisher figshare collection journal article supplement (https://diabetesjournals.figshare.com/articles/dataset/_/14888034)
Supplement: Supplementary file 2 [file 1]

|        |       |        | 735 podocyte enriched genes | 735 podocyte enriched genes | 126 podocyte specific genes | 126 podocyte specific genes | 609 other podocyte enriched genes | 609 other podocyte enriched genes |
|--------|-------|--------|-----------------------------|-----------------------------|-----------------------------|-----------------------------|-----------------------------------|-----------------------------------|
|        |       | Change | Gene number                 | Percentage                  | Gene number                 | Percentage                  | Gene number                       | Percentage                        |
| Type 1 | Early | up     | 74                          | 10.10%                      | 5                           | 4.00%                       | 69                                | 11.30%                            |
| Type 1 | Early | down   | 81                          | 11.00%                      | 30                          | 23.80%                      | 51                                | 8.40%                             |
| Type 1 | Later | up     | 73                          | 9.90%                       | 2                           | 1.60%                       | 71                                | 11.70%                            |
| Type 1 | Later | down   | 62                          | 8.40%                       | 28                          | 22.20%                      | 34                                | 5.60%                             |
| Type 2 | Early | up     | 162                         | 22.00%                      | 21                          | 16.70%                      | 141                               | 23.20%                            |
| Type 2 | Early | down   | 145                         | 19.70%                      | 45                          | 35.70%                      | 100                               | 16.40%                            |
| Type 2 | Later | up     | 172                         | 23.40%                      | 4                           | 3.20%                       | 168                               | 27.60%                            |
| Type 2 | Later | down   | 168                         | 22.90%                      | 70                          | 55.60%                      | 98                                | 16.10%                            |
