# Supplementary material
Source: publisher figshare collection journal article supplement (https://diabetesjournals.figshare.com/articles/dataset/_/14888034)
Supplement: Supplementary file 3 [file 1]

| d1 d2 both up |  | d1 d2 both down |  | d1-down d2 up |  | d1-up d2 down |  | D1 Up Only |  | D2 Up Only    |  | D1 Down Only  |  | D2 Down Only |  |
|---------------|--|-----------------|--|---------------|--|---------------|--|------------|--|---------------|--|---------------|--|--------------|--|
| Tubb2a        |  | C1qtnf7         |  | Pmepa1        |  | Irgm2         |  | Irgm2      |  | Mustn1        |  | Adcy5         |  | Hpca         |  |
| Scrn1         |  | Gas1            |  | Epha6         |  | Stat1         |  | Ephx1      |  | Adamts15      |  | 2010111i01rik |  | Kcnj12       |  |
| Rras2         |  | Sulf1           |  | Txlnb         |  | H2-q4         |  | Stat1      |  | Adamts14      |  | Pmepa1        |  | Astn2        |  |
| Mlkl          |  | Zfp423          |  | Sspn          |  | Pla2g7        |  | H2-Q4      |  | Endou         |  | Tspan13       |  | H2-Q6        |  |
| Nfkbie        |  | Rhbdl3          |  | Vash1         |  | Svep1         |  | Pknox2     |  | Fam212b       |  | Lor           |  | Dusp15       |  |
| Myof          |  | Kcng2           |  | Marveld1      |  | Atp1b2        |  | Pla2g7     |  | Aldh1a2       |  | Klhl29        |  | Nr4a3        |  |
| S100a13       |  | Snx31           |  | Mxra7         |  | H2-q6         |  | Uprt       |  | Rab7b         |  | Epha6         |  | Thsd7a       |  |
| Mpp3          |  | Arhgef26        |  | Slc9a3r2      |  | Slco2a1       |  | Tmem47     |  | Tpm1          |  | Lctl          |  | Rdh1         |  |
| Btg2          |  | Foxl1           |  | Inhbb         |  | Dock4         |  | Parp12     |  | Emp3          |  | Wsb2          |  | Stk26        |  |
| Gpsm3         |  | Zbtb8a          |  | Sptbn5        |  | Mpp5          |  | Slc39a6    |  | Socs2         |  | Lrrc10b       |  | Shisa3       |  |
| Tnfrsf12a     |  | 2010300c0       |  | Rnf150        |  | Mmp17         |  | Svep1      |  | Epha6         |  | Fxyd6         |  | Wif1         |  |
| Hip1          |  | Gja3            |  | Hs3st6        |  |               |  | Gm14403    |  | Nell2         |  | Cry1          |  | Fgfbp1       |  |
| Serpib6a      |  | Mgat5b          |  | Inf2          |  |               |  | Gm10509    |  | Anxa1         |  | Txlnb         |  | Magi2        |  |
| Unc13b        |  | Ngb             |  |               |  |               |  | Rab13      |  | Tmbim1        |  | Lysmd2        |  | Sema3e       |  |
| Actn1         |  | Slc37a2         |  |               |  |               |  | Fam114a1   |  | Vopp1         |  | 9930012k11rik |  | Unc5c        |  |
| Myh9          |  | Nphs1           |  |               |  |               |  | Atp1b2     |  | Gsta4         |  | Aard          |  | Ephb1        |  |
| Tshb          |  | Angptl2         |  |               |  |               |  | H2-Q6      |  | Vim           |  | Sspn          |  | Nphs2        |  |
| Emilin1       |  | Cables1         |  |               |  |               |  | Slco2a1    |  | Txlnb         |  | Nxn           |  | Enpep        |  |
| Iqgap1        |  | Abca9           |  |               |  |               |  | Dock4      |  | Lrtm2         |  | Col1a2        |  | Cmtm7        |  |
| Gsdmd         |  | Chst1           |  |               |  |               |  | Pros1      |  | Serpib6b      |  | E330009j07rik |  | Vtcn1        |  |
| Actn4         |  | Ddn             |  |               |  |               |  | Megf9      |  | Sec16b        |  | Tyro3         |  | Ras11a       |  |
| Prkci         |  | Pcsk6           |  |               |  |               |  | Sh3bp4     |  | Gm1673        |  | Vash1         |  | Srrm4        |  |
| Ncf2          |  | Plat            |  |               |  |               |  | Ormdl3     |  | Myoz1         |  | Man1a2        |  | Tdrd5        |  |
| Golm1         |  | Foxd2           |  |               |  |               |  | St3gal1    |  | Sparc         |  | Fzd2          |  | Tmem108      |  |
| Rarb          |  | Aplp1           |  |               |  |               |  | Eif3m      |  | Pamr1         |  | Ppfibp2       |  | Gabrb1       |  |
| Esyt1         |  | Metrnl          |  |               |  |               |  | Ehd4       |  | Il18          |  | Ehd2          |  | Steap3       |  |
| Emp2          |  | Col4a3          |  |               |  |               |  | Casz1      |  | Sspn          |  | Speg          |  | P3h2         |  |
| Pde3b         |  | Crb2            |  |               |  |               |  | Calm2      |  | Vash1         |  | Plekho1       |  | H2-Q7        |  |
| Myl12a        |  | Kirrel          |  |               |  |               |  | Epb4.115   |  | Anks1b        |  | Foxc1         |  | Dctd         |  |
| Prmt2         |  | Mtcl1           |  |               |  |               |  | Psd3       |  | 6030419c18rik |  | Marveld1      |  | Lingo2       |  |
| F2r           |  | Dpysl2          |  |               |  |               |  | Mpp5       |  | Mycl          |  | Mxra7         |  | R3hdml       |  |
| Cyr61         |  | Rassf10         |  |               |  |               |  | Rab6b      |  | Colgalt2      |  | Plxnb1        |  | Sncap        |  |
| Mdfic         |  | Galnt10         |  |               |  |               |  | Mmp17      |  | Pqlc3         |  | Slc9a3r2      |  | Ntrk3        |  |
| Nde1          |  | Ntng2           |  |               |  |               |  | Peli3      |  | Fgl2          |  | Pbx2          |  | Asb15        |  |
| Sipa1l2       |  | Mgat5           |  |               |  |               |  | Creb3l1    |  | Gulp1         |  | Lgals2        |  | Clic3        |  |
| Tubb2b        |  | Cldn5           |  |               |  |               |  | Gfod1      |  | S100a11       |  | Gbx1          |  | Gnao1        |  |
| Specc1l       |  | Sox5            |  |               |  |               |  | Rusc2      |  | Axl           |  | Inhbb         |  | Nr4a1        |  |
| Stxbp1        |  | Ccdc92          |  |               |  |               |  | Ajuba      |  | Tuba1a        |  | Bambi         |  | Hspa12a      |  |
| Anxa3         |  | Rcsd1           |  |               |  |               |  | Hivep2     |  | Tmsb4x        |  | Glp1r         |  | Bc029214     |  |
| Plekhg1       |  | Vegfa           |  |               |  |               |  | Parp4      |  | Ccdc80        |  | Sptbn5        |  | Podxl        |  |
| Fndc3b        |  | Pag1            |  |               |  |               |  | Pvrl4      |  | Sptbn5        |  | Nxph3         |  | Acpp         |  |
| Cd2ap         |  | Npr3            |  |               |  |               |  | Nedd9      |  | Rras          |  | Ube2ql1       |  | Ccdc167      |  |
| Arntl         |  | Mapt            |  |               |  |               |  | Kif5b      |  | Sync          |  | Kctd11        |  | Tmem150c     |  |
| Igfbp2        |  | Htra1           |  |               |  |               |  | Pard6b     |  | Filip1        |  | Pmp22         |  | St6galnac3   |  |
| Atf3          |  | Col4a5          |  |               |  |               |  | Elmo2      |  | Lrrc20        |  | Rnf150        |  | Dpp4         |  |
| Ankrd1        |  | Lmx1b           |  |               |  |               |  |            |  | Gdnf          |  | St6gal1       |  | Fam65a       |  |
| Adamts4       |  | Lingo1          |  |               |  |               |  |            |  | Ccdc109b      |  | Hs3st6        |  | Plagl1       |  |
| Cerk          |  | Tmem95          |  |               |  |               |  |            |  | Arhgap33      |  | Map1a         |  | Fndc5        |  |
| Cnp           |  | Mafa            |  |               |  |               |  |            |  | 2210013o21rik |  | E2f1          |  | Robo2        |  |

|          |  |         |  |  |  |  |  |  |  |  |               |  |        |  |          |
|----------|--|---------|--|--|--|--|--|--|--|--|---------------|--|--------|--|----------|
| Vgll3    |  | Kcnf1   |  |  |  |  |  |  |  |  | Pmepa1        |  | Zbtb7c |  | Arvcf    |
| Arhgap19 |  | Sox8    |  |  |  |  |  |  |  |  | Extl1         |  | Ksr1   |  | Golim4   |
| Synj2    |  | Mylk3   |  |  |  |  |  |  |  |  | Stx11         |  | Nod1   |  | Arhgap28 |
| Cbarp    |  | Bhlhe41 |  |  |  |  |  |  |  |  | Necab3        |  | Trib2  |  | Cd55     |
| Plekha2  |  | Dync1i1 |  |  |  |  |  |  |  |  | C1ra          |  | Inf2   |  | Cryab    |
| Sh3pxd2a |  | Sgip1   |  |  |  |  |  |  |  |  | Rasl11a       |  |        |  | Amigo2   |
| Fosl2    |  | Lrrc49  |  |  |  |  |  |  |  |  | Tmem98        |  |        |  | Hoxc6    |
| Rhbdf2   |  | Rarres1 |  |  |  |  |  |  |  |  | Gpx7          |  |        |  | Tm4sf1   |
| Zfp651   |  | Ptchd4  |  |  |  |  |  |  |  |  | Nr4a2         |  |        |  | Mertk    |
| Luzp1    |  | Ptpro   |  |  |  |  |  |  |  |  | Siva1         |  |        |  | Colec12  |
| Ucp2     |  | Sema6c  |  |  |  |  |  |  |  |  | Adm           |  |        |  | Igf2bp1  |
| Dtx4     |  | Foxc2   |  |  |  |  |  |  |  |  | Ndn           |  |        |  | Adm      |
| Plekhg2  |  | Rhpn1   |  |  |  |  |  |  |  |  | Ptgds         |  |        |  | Npnt     |
| Btg3     |  | Pde4b   |  |  |  |  |  |  |  |  | Nrep          |  |        |  | Cep85l   |
| Map1b    |  | Mmp23   |  |  |  |  |  |  |  |  | Il34          |  |        |  | Synpo    |
| Gadd45b  |  | Npr1    |  |  |  |  |  |  |  |  | Sh3bp5l       |  |        |  | Plce1    |
| Srf      |  | Wt1     |  |  |  |  |  |  |  |  | Zbtb42        |  |        |  | Sema3g   |
| Dusp8    |  | Pak1    |  |  |  |  |  |  |  |  | Tmem159       |  |        |  | Bcar3    |
| Amotl2   |  | Top1mt  |  |  |  |  |  |  |  |  | Cd59b         |  |        |  | Mafb     |
| Rnasel   |  | Tns2    |  |  |  |  |  |  |  |  | Inf2          |  |        |  | St3gal6  |
| Samd4    |  |         |  |  |  |  |  |  |  |  | P2ry6         |  |        |  | Hs3st3b1 |
| Nck2     |  |         |  |  |  |  |  |  |  |  | Anxa2         |  |        |  | Pdzd7    |
| Gab2     |  |         |  |  |  |  |  |  |  |  | Tcf21         |  |        |  | Alcam    |
| Aif1l    |  |         |  |  |  |  |  |  |  |  | Eml1          |  |        |  | Arhgap24 |
| Kank2    |  |         |  |  |  |  |  |  |  |  | Timp2         |  |        |  | Clic5    |
| Arl4c    |  |         |  |  |  |  |  |  |  |  | Hs3st3a1      |  |        |  | Lats2    |
| Mtch1    |  |         |  |  |  |  |  |  |  |  | Rbfox2        |  |        |  | Glcci1   |
| Ldlrap1  |  |         |  |  |  |  |  |  |  |  | Marveld1      |  |        |  | Cd59a    |
| Otud7b   |  |         |  |  |  |  |  |  |  |  | 4930523c07rik |  |        |  | Pard3b   |
|          |  |         |  |  |  |  |  |  |  |  | Tspan17       |  |        |  | Sema5a   |
|          |  |         |  |  |  |  |  |  |  |  | Pea15a        |  |        |  | Wipf3    |
|          |  |         |  |  |  |  |  |  |  |  | Ptrf          |  |        |  | Cttb2    |
|          |  |         |  |  |  |  |  |  |  |  | Fam78b        |  |        |  | Atp1b2   |
|          |  |         |  |  |  |  |  |  |  |  | Palld         |  |        |  | C1qtnf1  |
|          |  |         |  |  |  |  |  |  |  |  | Gpsm2         |  |        |  | Slain2   |
|          |  |         |  |  |  |  |  |  |  |  | Lix1l         |  |        |  | Mpp5     |
|          |  |         |  |  |  |  |  |  |  |  | Tppp          |  |        |  | Nsf      |
|          |  |         |  |  |  |  |  |  |  |  | Septin6       |  |        |  | Car13    |
|          |  |         |  |  |  |  |  |  |  |  | Cdr2l         |  |        |  | Mcc      |
|          |  |         |  |  |  |  |  |  |  |  | Ahnak         |  |        |  | Lamb2    |
|          |  |         |  |  |  |  |  |  |  |  | Zfp385b       |  |        |  | Atp8b1   |
|          |  |         |  |  |  |  |  |  |  |  | Plod2         |  |        |  | Nab2     |
|          |  |         |  |  |  |  |  |  |  |  | Myadm         |  |        |  | Cdc14a   |
|          |  |         |  |  |  |  |  |  |  |  | Hs3st6        |  |        |  | Mylk     |
|          |  |         |  |  |  |  |  |  |  |  | Bnip2         |  |        |  | Abca5    |
|          |  |         |  |  |  |  |  |  |  |  | Apba1         |  |        |  | Flrt2    |
|          |  |         |  |  |  |  |  |  |  |  | Hoxc8         |  |        |  | Prx      |
|          |  |         |  |  |  |  |  |  |  |  | Prkg1         |  |        |  | Myo1e    |
|          |  |         |  |  |  |  |  |  |  |  | Ptger4        |  |        |  | Cdkn1c   |
|          |  |         |  |  |  |  |  |  |  |  | Tmsb10        |  |        |  | Zak      |
