# Supplementary material
Source: publisher figshare collection journal article supplement (https://diabetesjournals.figshare.com/articles/dataset/_/14888034)
Supplement: Supplementary file 4 [file 1]

## Supplemental Figure legends

**Supplemental Figure S1.** (A) Fasting blood sugar in type 2 diabetic podocin-Cre; Rosa26<sup>fsTRAP</sup>; eNOS<sup>-/-</sup>; *db/db* mice. \**P* < 0.05, n = 6. (B) PAS staining showed more severe mesangial expansion and nodular glomerular sclerosis in 6 months old than 3 months old podocin-Cre; Rosa26<sup>fsTRAP</sup>; eNOS<sup>-/-</sup>; *db/db* mice. (C) Fasting blood sugar in streptozotocin (STZ)-induced type 1 diabetic podocin-Cre; Rosa26<sup>fsTRAP</sup>; eNOS<sup>-/-</sup>-mice (C). \**P* < 0.05, n = 6. (D) PAS staining showed mesangial expansion in podocin-Cre; Rosa26<sup>fsTRAP</sup>; eNOS<sup>-/-</sup>-mice 3 weeks after STZ injection but mesangial expansion and nodular glomerular sclerosis were observed in podocin-Cre; Rosa26<sup>fsTRAP</sup>; eNOS<sup>-/-</sup>-mice 24 weeks after STZ injection. Scale bar=100  $\mu$ m.

**Supplemental Figure S2.** Top 20 GO\_BP, GO\_MF, and KEGG enriched in 735 enriched genes in podocytes shows podocyte development and other pathways.

**Supplemental Figure S3.** Volcano plot distribution shows enriched genes in podocytes in an early stage (3 months old) of type 2 diabetic podocin-Cre; Rosa26<sup>fsTRAP</sup>; eNOS<sup>-/-</sup>; *db/db* mice.

**Supplemental Figure S4.** Volcano plot distribution shows enriched genes in podocytes in an advanced stage (6 months old) of type 2 diabetic podocin-Cre; Rosa26<sup>fsTRAP</sup>; eNOS<sup>-/-</sup>; *db/db* mice.

**Supplemental Figure S5.** Volcano plot distribution shows enriched genes in podocytes in an early stage (3 weeks) of streptozotocin-induced type 1 diabetic podocin-Cre; Rosa26<sup>fsTRAP</sup>; eNOS<sup>-/-</sup> mice.

**Supplemental Figure S6.** Volcano plot distribution shows enriched genes in podocytes in a later stage (24 weeks) of streptozotocin-induced type 1 diabetic podocin-Cre; Rosa26<sup>fsTRAP</sup>; eNOS<sup>-/-</sup> mice.

**Supplemental Figure S7.** Immunohistochemical staining showed that both Ngb and claudin 5 staining was primarily restricted to glomeruli in normal wild type mice. Original magnification: x 200.

**Supplemental Figure S8.** Claudin 5 and tetraspanin 2 expression in podocytes in T2DN and T1DN. **A.** Podocyte TRAP *Cldn5* levels were decreased in early and later stages of T2DN and T1DN. \**P* < 0.05, n = 3-5. Claudin 5 expression in podocytes was decreased in type 2 diabetic podocytes. **B.** In normal wild type mice, claudin 5 was primarily colocalized with nephrin, a podocyte marker. **C.** Podocyte TRAP *Tspan2* levels were increased in early T2DN. \**P* < 0.05, n = 3-5. Tetraspanin 2 expression in podocytes was higher in eNOS<sup>-/-</sup>; *db/db* than eNOS<sup>-/-</sup> mice. Magnification: x 600 for all.

**Supplemental Figure S9.** Magi2 expression in eNOS<sup>-/-</sup> mice (6 months old), STZ-treated eNOS<sup>-/-</sup> mice (24 weeks after STZ), and eNOS<sup>-/-</sup>; *db/db* mice (6 months old). Original magnification: x 600.

**Supplemental Figure S10.** Podocyte TRAP Npr1 and Npr3 levels were decreased in type 2 and type 1 diabetic nephropathy. Type 2 diabetic podocin-Cre; Rosa26<sup>fsTRAP</sup>; eNOS<sup>-/-</sup>; *db/db* mice and streptozotocin-induced type 1 diabetic podocin-Cre; Rosa26<sup>fsTRAP</sup>; eNOS<sup>-/-</sup>-mice were used. **A.** Podocyte TRAP Npr1 levels were decreased in early and later stages of type 2 diabetic nephropathy (T2DN) and T1DN. **B.** Podocyte TRAP Npr3 levels were decreased in early and laterstages of type 2 diabetic nephropathy (T2DN) and T1DN.

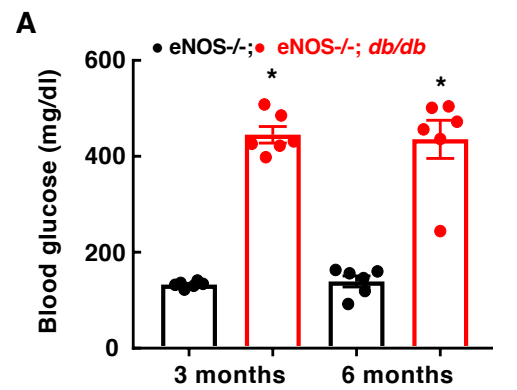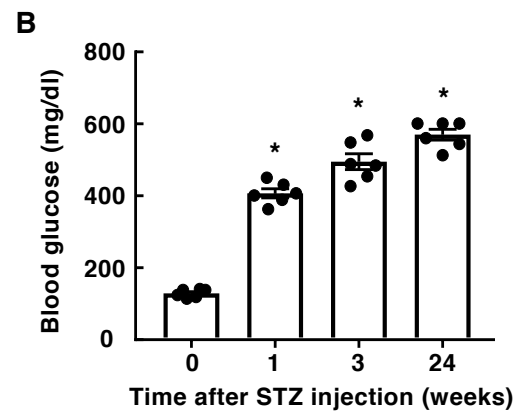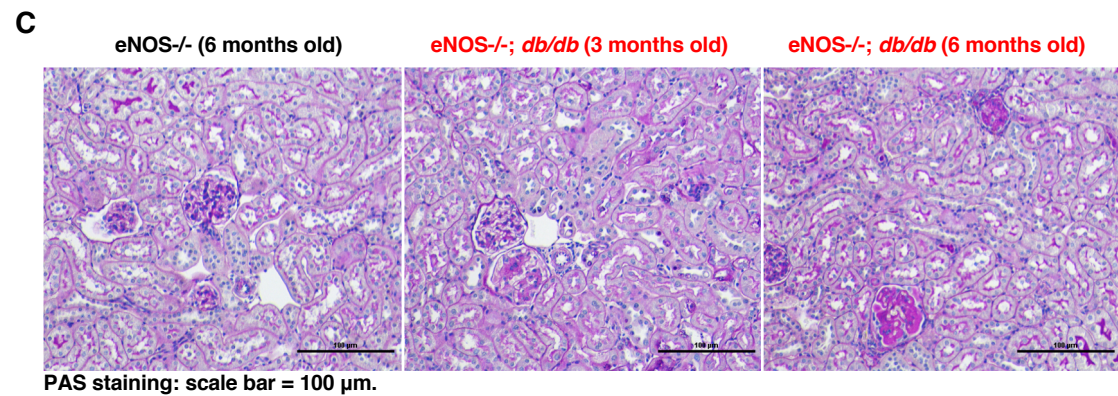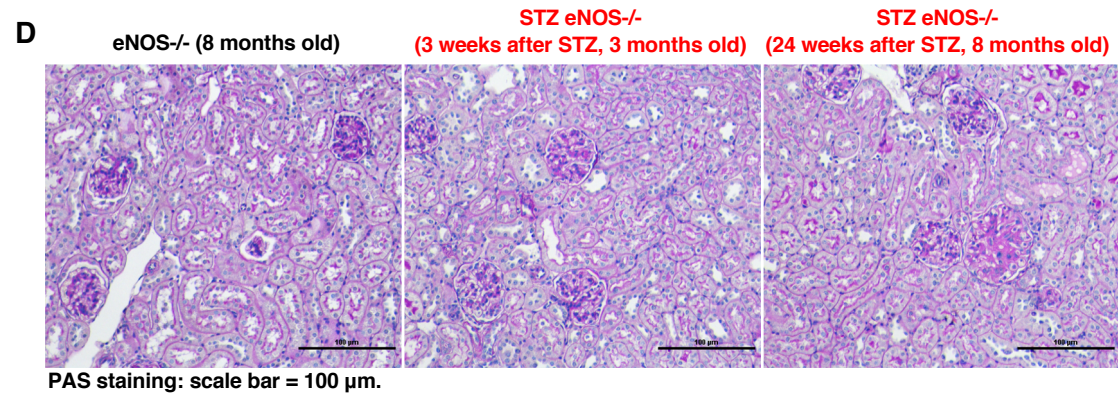

Supplementary Figure S1

### Top 20 GO/ KEGG pathways enriched in all 735 podocyte enriched genes

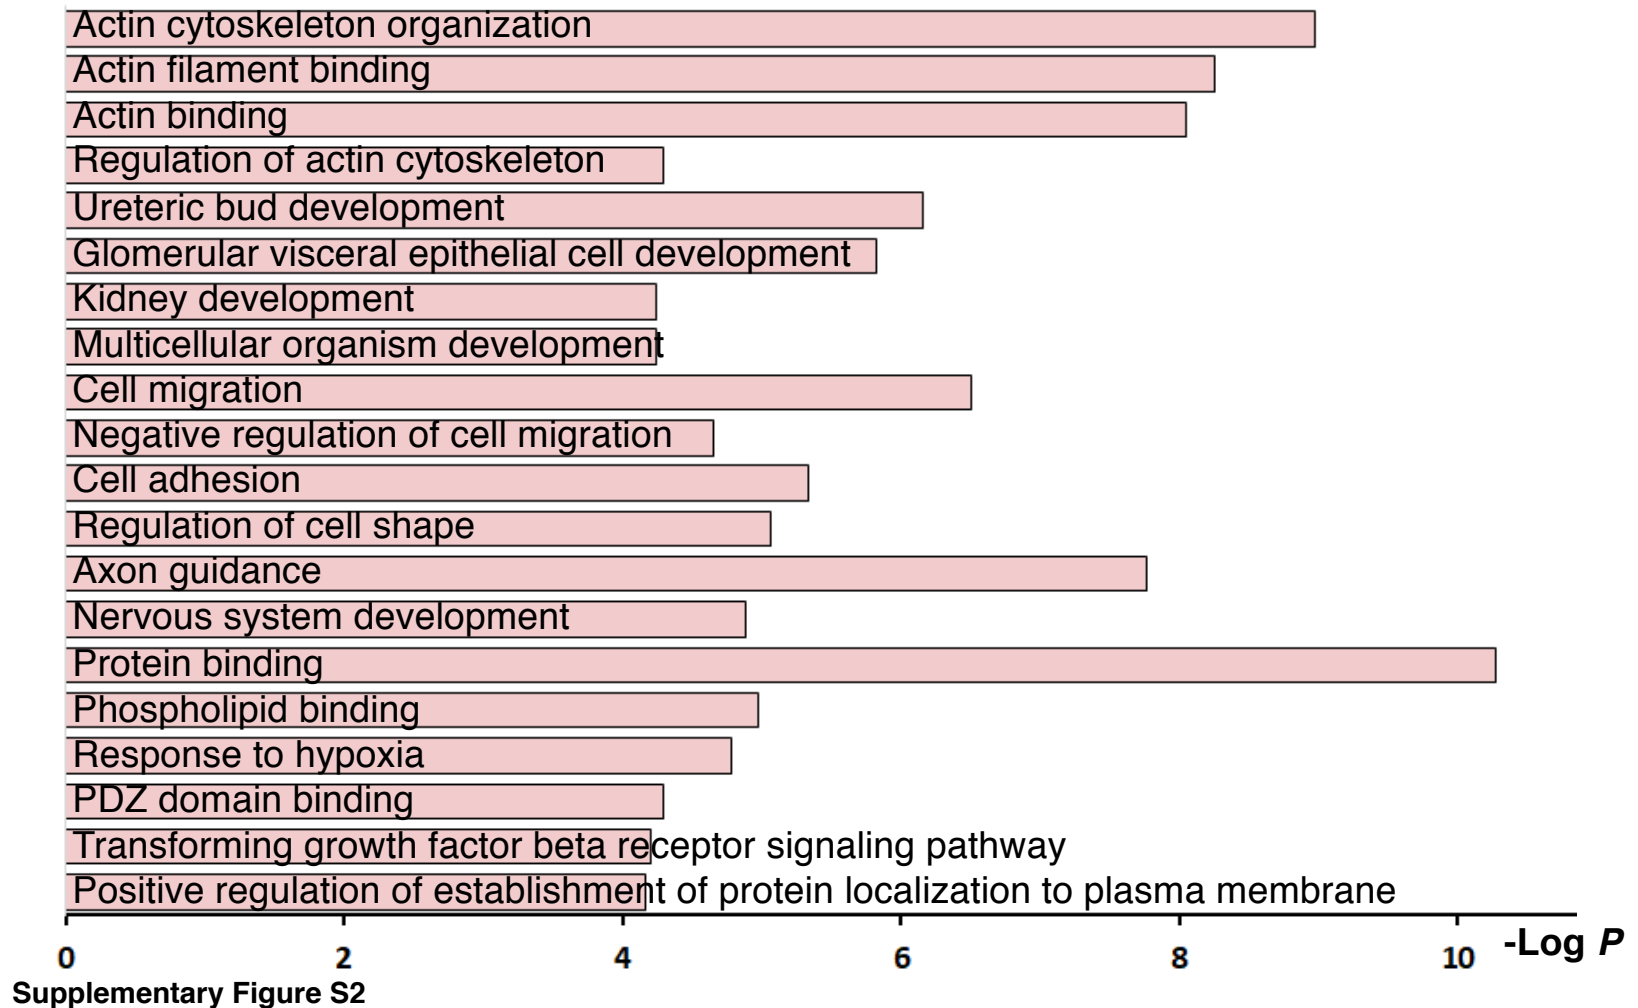



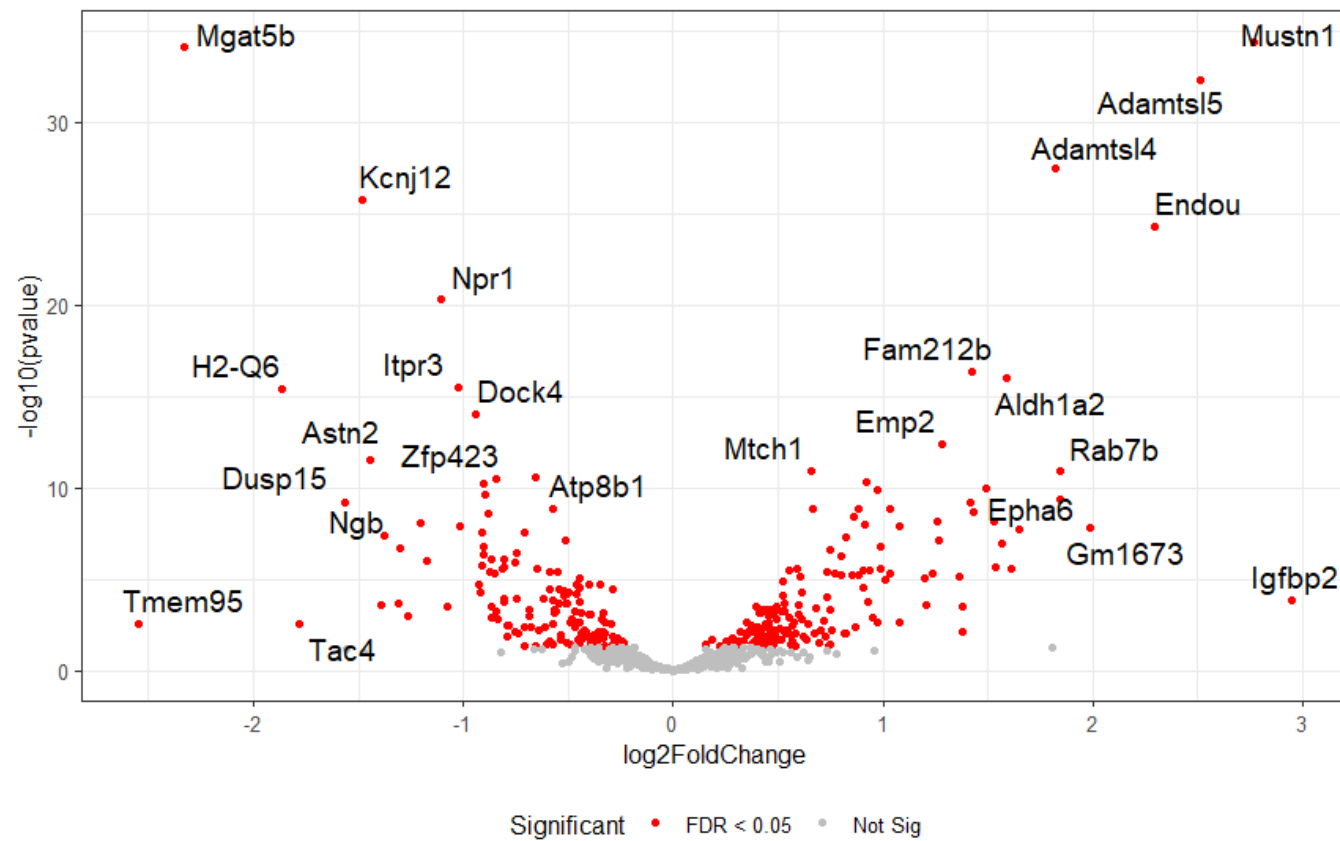

Supplementary Figure S3

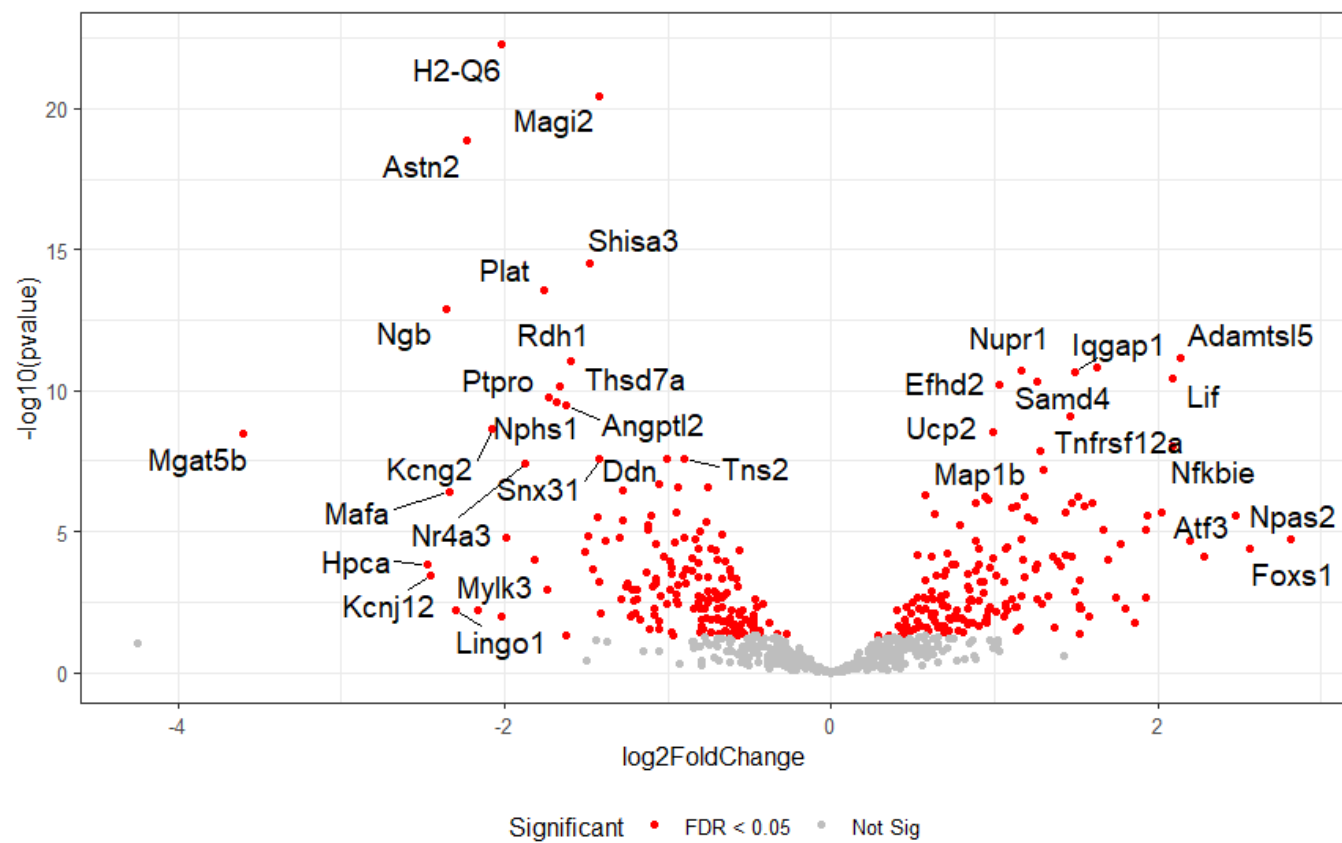

**Supplementary Figure S4**

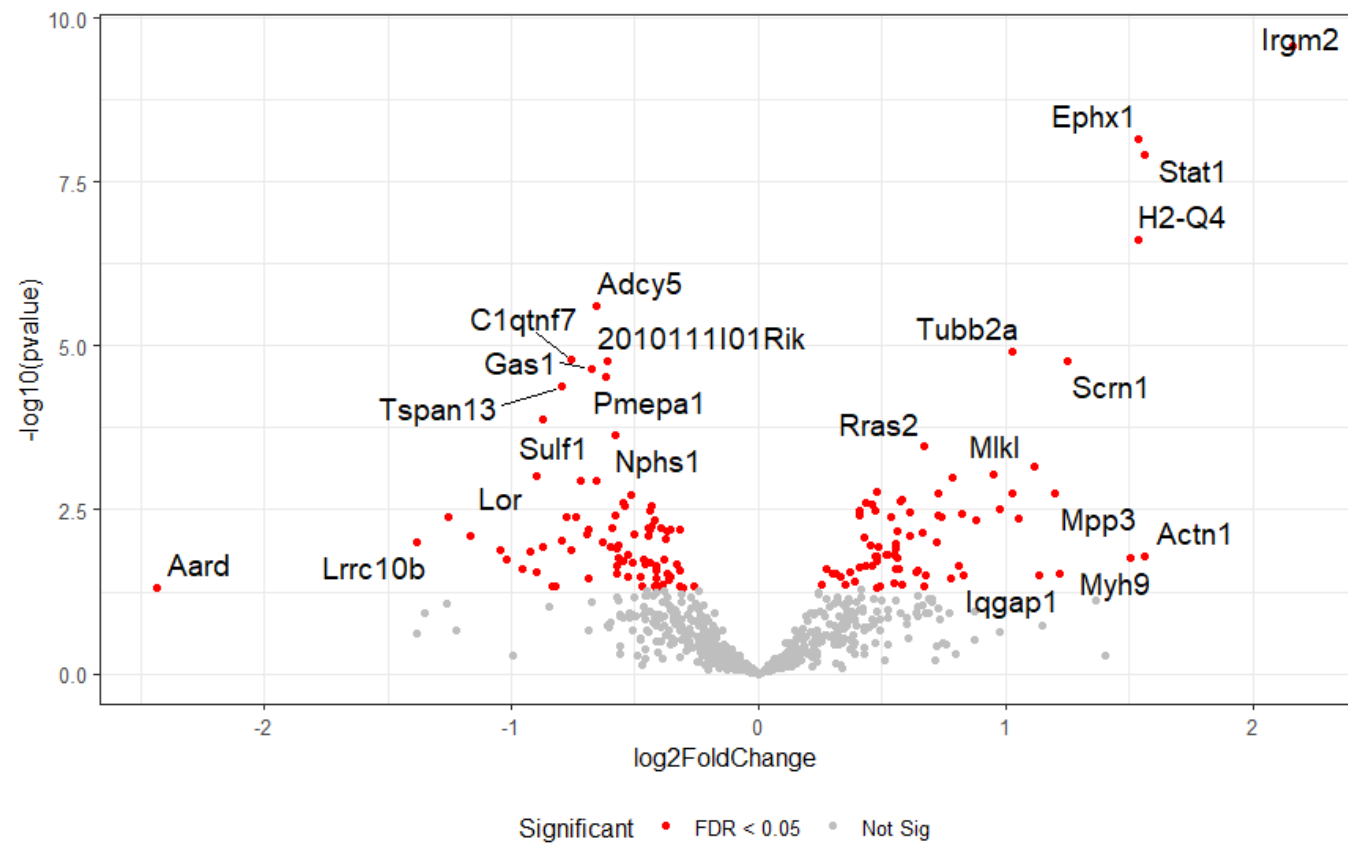

**Supplementary Figure S5**

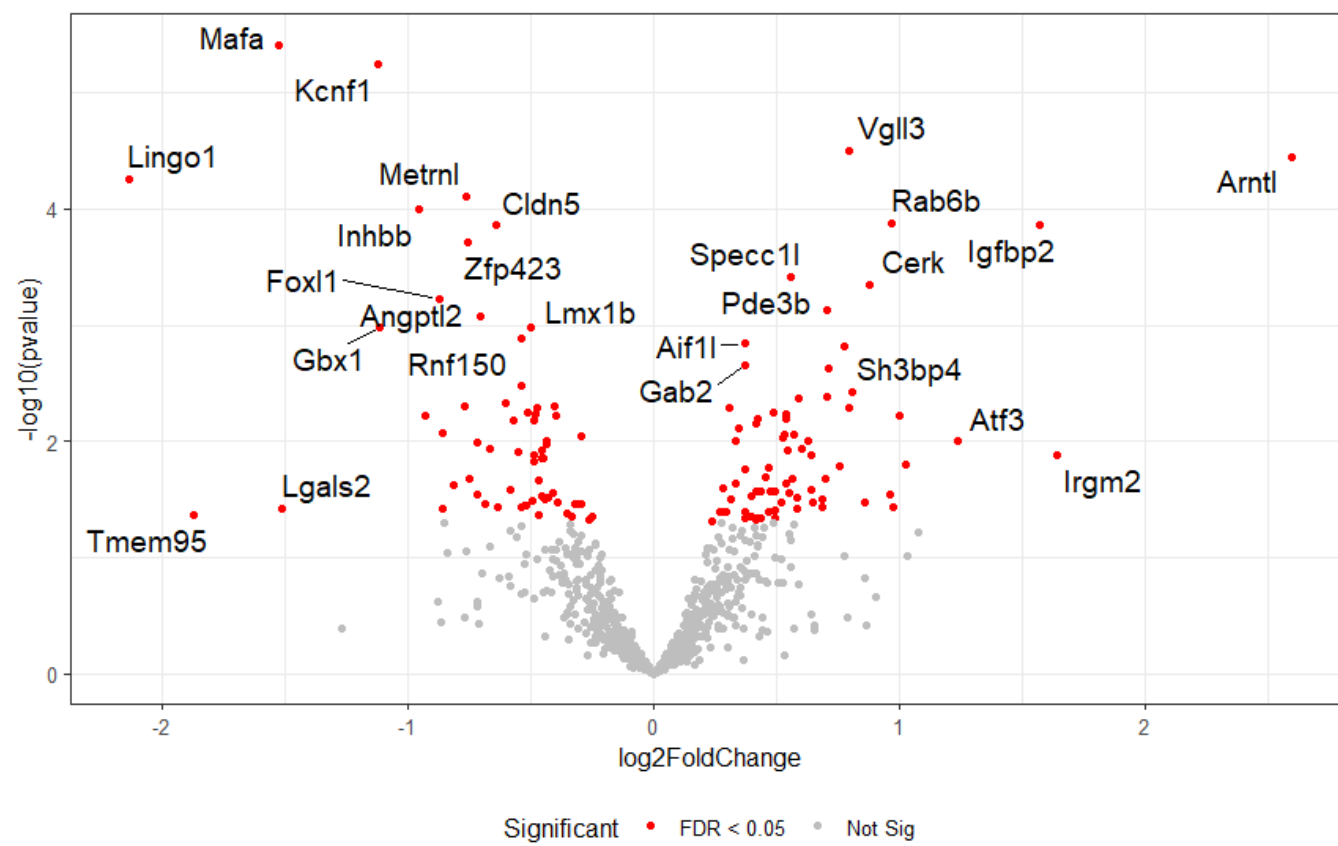

**Supplementary Figure S6**

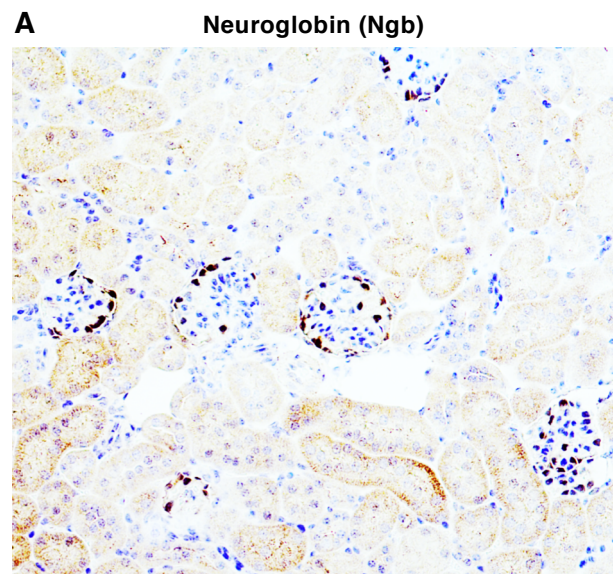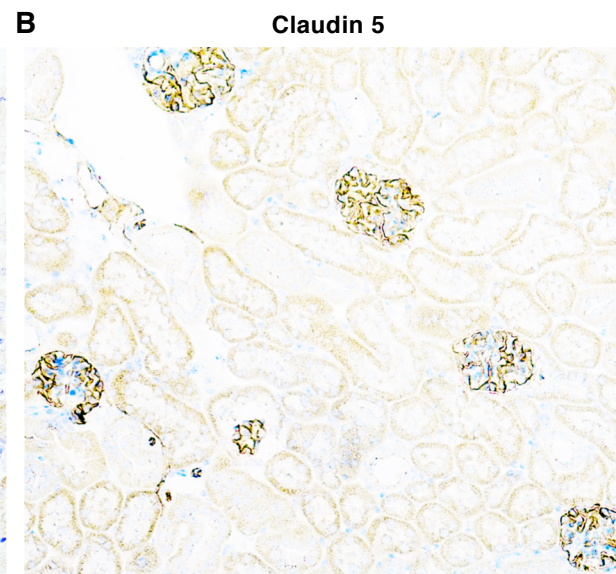

Original magnification: x 200.

**Supplementary Figure S7**

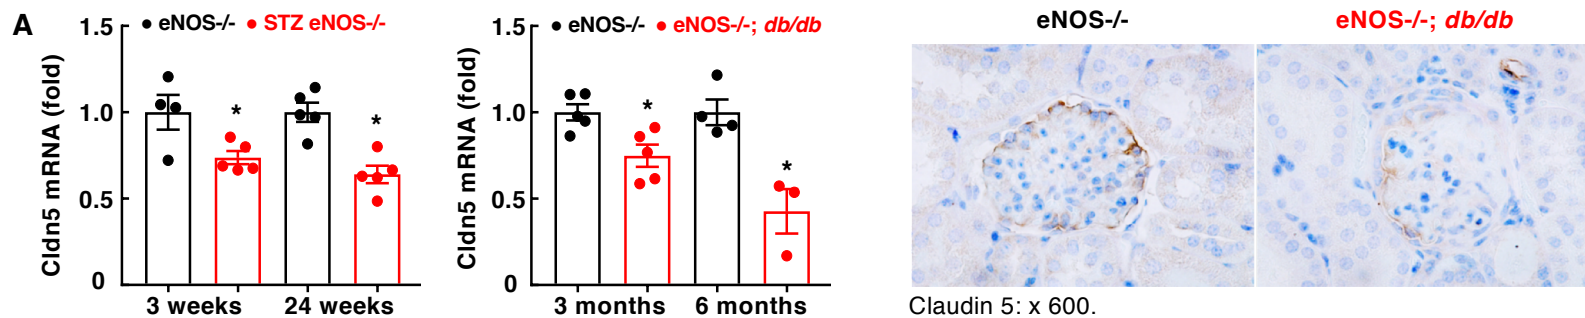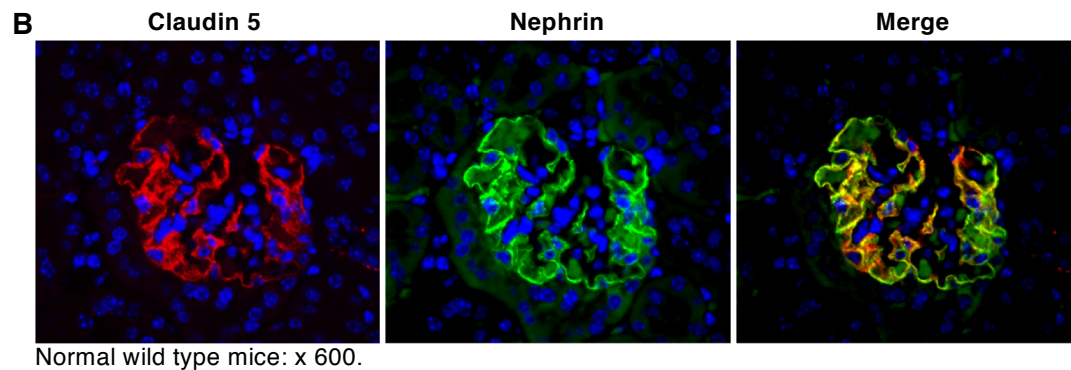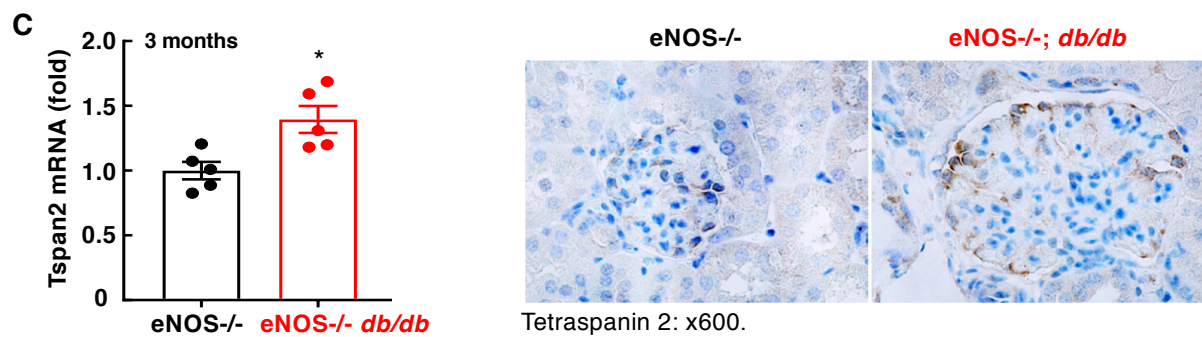

Supplementary Figure S8



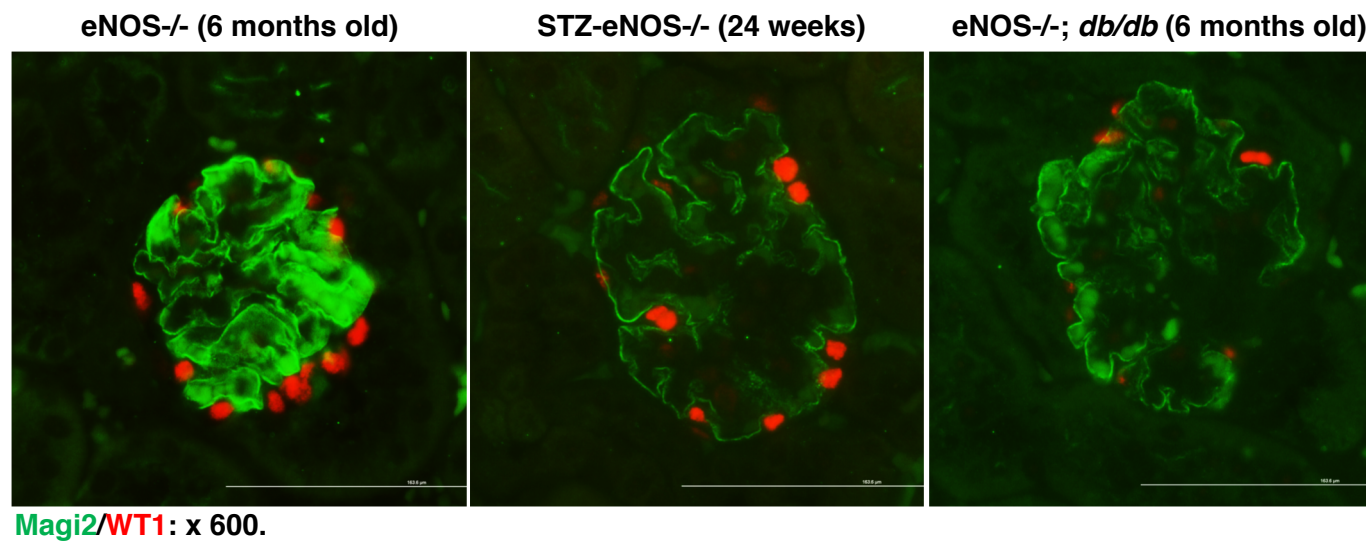

Supplementary Figure S9

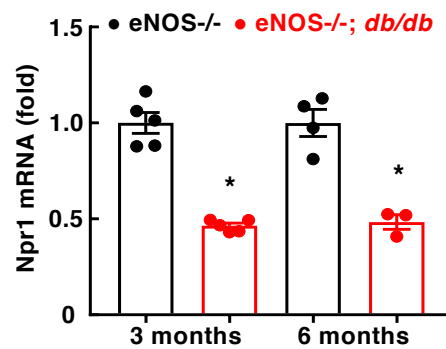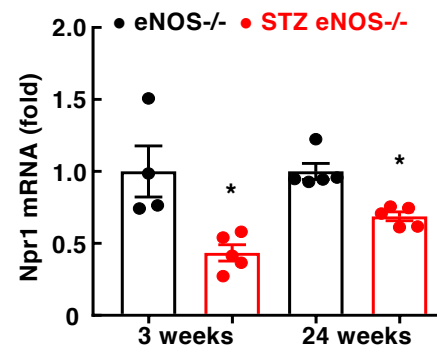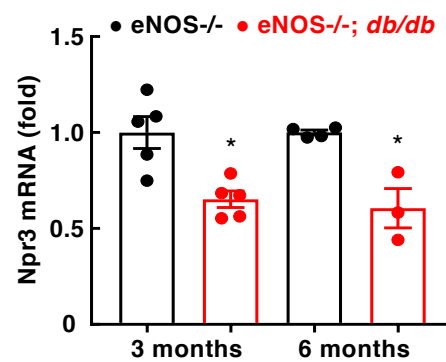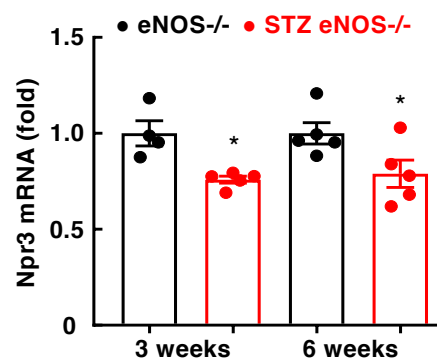

Supplementary Figure S10
