# Supplementary material
Source: publisher figshare collection journal article supplement (https://diabetesjournals.figshare.com/articles/dataset/_/14888034)
Supplement: Supplementary file 6 [file 1]

| 3w-up     |            |          | 3w-down   |            |          | 24w-up    |            |          | 24w-down |            |          | 3w-24w both up |  | 3w-24w both down |  | 3w-down 24w-up |  | 3w up only |  | 24w up only |  | 3w down only  |  | 24w down only |  |
|-----------|------------|----------|-----------|------------|----------|-----------|------------|----------|----------|------------|----------|----------------|--|------------------|--|----------------|--|------------|--|-------------|--|---------------|--|---------------|--|
| Gene      | FoldChange | pvalue   | Gene      | FoldChange | pvalue   | Gene      | FoldChange | pvalue   | Gene     | FoldChange | pvalue   | Gene           |  | Gene             |  | Gene           |  | Gene       |  | Gene        |  | Gene          |  | Gene          |  |
| Irgm2     | 4.478218   | 2.72E-19 | Adcy5     | -1.57568   | 2.51E-06 | Vgll3     | 1.732986   | 3.16E-05 | Mafa     | -2.882     | 3.92E-06 | Irgm2          |  | Adcy5            |  | Cry1           |  | Stat1      |  | Arntl       |  | 2010111i01rik |  | Lingo1        |  |
| Ephx1     | 2.897107   | 6.93E-09 | C1qtnf7   | -1.69475   | 1.59E-05 | Arntl     | 6.043081   | 3.52E-05 | Kcnf1    | -2.17608   | 5.69E-06 | Ephx1          |  | C1qtnf7          |  | Efhd2          |  | Tubb2a     |  | Igfbp2      |  | Gas1          |  | Tmem95        |  |
| Stat1     | 2.948447   | 1.19E-08 | 2010111i0 | -1.53097   | 1.7E-05  | Rab6b     | 1.956205   | 0.000131 | Lingo1   | -4.40781   | 5.60E-05 | H2-Q4          |  | Zfp423           |  |                |  | Scrn1      |  | Atf3        |  | Pmepa1        |  | Mafa          |  |
| H2-Q4     | 2.89708    | 2.38E-07 | Gas1      | -1.59615   | 2.18E-05 | Igfbp2    | 2.976413   | 0.000137 | Metrl    | -1.69929   | 7.74E-05 | Rras2          |  | Rhbdl3           |  |                |  | Mkl        |  | Ankrd1      |  | Tspan13       |  | Lgals2        |  |
| Tubb2a    | 2.0334     | 1.24E-05 | Pmepa1    | -1.53579   | 2.99E-05 | Specc1    | 1.469599   | 0.000384 | Inhbb    | -1.93742   | 0.000101 | Tnfrsf12a      |  | Kcng2            |  |                |  | Nfkbie     |  | Rab6b       |  | Sulf1         |  | Kcnf1         |  |
| Scrn1     | 2.38119    | 1.71E-05 | Tspan13   | -1.73477   | 4.21E-05 | Cerk      | 1.837833   | 0.00045  | Cldn5    | -1.55805   | 0.000139 | Emilin1        |  | Snx31            |  |                |  | Myof       |  | Adamts4     |  | Lor           |  | Gbx1          |  |
| Rras2     | 1.590693   | 0.000345 | Sulf1     | -1.83356   | 0.00013  | Pde3b     | 1.628564   | 0.000732 | Zfp423   | -1.68846   | 0.000192 | H2-Q6          |  | Foxl1            |  |                |  | S100a13    |  | Cerk        |  | Klh29         |  | Inhbb         |  |
| Mkl       | 2.167699   | 0.000692 | Nphs1     | -1.49591   | 0.000226 | Aif1l     | 1.294173   | 0.001445 | Foxl1    | -1.83253   | 0.000598 | Golm1          |  | Gja3             |  |                |  | Pknx2      |  | Mmp17       |  | Epha6         |  | Sox8          |  |
| Nfkbie    | 1.932925   | 0.000899 | Lor       | -1.86477   | 0.000988 | Sh3bp4    | 1.709507   | 0.001542 | Angptl2  | -1.63078   | 0.000839 | Slco2a1        |  | Mgat5b           |  |                |  | Mpp3       |  | Cnp         |  | Arhgef26      |  | Mylk3         |  |
| Myof      | 1.724211   | 0.001044 | Zfp423    | -1.64392   | 0.001114 | Gab2      | 1.295322   | 0.00222  | Lmx1b    | -1.41423   | 0.001029 | Ifngr1         |  | Nphs1            |  |                |  | Pla2g7     |  | Vgll3       |  | Extl1         |  | Bambi         |  |
| Ormdl3    | 1.394247   | 0.00169  | Rhbdl3    | -1.57924   | 0.001128 | Pros1     | 1.639305   | 0.002389 | Gbx1     | -2.16535   | 0.001047 | Pros1          |  | Angptl2          |  |                |  | Uprt       |  | Arhgap19    |  | Lct1          |  | Glp1r         |  |
| S100a13   | 2.039172   | 0.001778 | Vash1     | -1.43004   | 0.00188  | Cnp       | 1.749571   | 0.003725 | Rnf150   | -1.45661   | 0.001294 | Megf9          |  | Nxn              |  |                |  | Btg2       |  | Synj2       |  | Wsb2          |  | Bhlhe41       |  |
| Pknx2     | 1.653464   | 0.001779 | Ddn       | -1.46166   | 0.002464 | Golm1     | 1.630481   | 0.004171 | Lrrc49   | -1.4506    | 0.003286 | Sh3bp4         |  | Chst1            |  |                |  | Gpsm3      |  | Charp       |  | Lrrc10b       |  | Dync1i1       |  |
| Mpp3      | 2.28973    | 0.001808 | Mtcl1     | -1.3523    | 0.002754 | Sh3pxd2a  | 1.502623   | 0.00426  | Nxph3    | -1.52098   | 0.004705 | Pde3b          |  | Ddn              |  |                |  | Hip1       |  | Peli3       |  | Fxyd6         |  | Sgip1         |  |
| Fam114a1  | 1.492554   | 0.002183 | Pcsk6     | -1.45621   | 0.002764 | Ephx1     | 1.738332   | 0.005109 | Kcng2    | -1.70938   | 0.00497  | F2r            |  | Plat             |  |                |  | Serpinb6a  |  | Plekha2     |  | Zbtb8a        |  | Sptbn5        |  |
| Prkci     | 1.485497   | 0.002373 | Kirrel    | -1.35598   | 0.003229 | Kif5b     | 1.235468   | 0.005172 | Nphs1    | -1.32348   | 0.005016 | Cyr61          |  | Metrl            |  |                |  | Tmem47     |  | Creb3l1     |  | 2010300c02rik |  | Nxph3         |  |
| Eif3m     | 1.349846   | 0.00244  | Angptl2   | -1.49275   | 0.003861 | Ajuba     | 1.403318   | 0.005694 | Foxc2    | -1.39313   | 0.005115 | Nde1           |  | Cldn5            |  |                |  | Unc13b     |  | Sh3pxd2a    |  | Txlnb         |  | Ube2ql1       |  |
| Nde1      | 1.372043   | 0.002637 | Kcng2     | -1.66746   | 0.004011 | Ucp2      | 1.453516   | 0.005765 | Rhbdl3   | -1.43015   | 0.005637 | Tubb2b         |  | Lmx1b            |  |                |  | Parp12     |  | Fosl2       |  | Ngb           |  | Kctd11        |  |
| Pla2g7    | 1.966257   | 0.003061 | Klh29     | -1.71434   | 0.004063 | Ankrd1    | 1.997703   | 0.005968 | Chst1    | -1.39414   | 0.005826 | Ehd4           |  |                  |  |                |  | Actn1      |  | Rhbdl3      |  | Lysmd2        |  | Pmp22         |  |
| Specc1    | 1.3283     | 0.003215 | Epha6     | -2.39004   | 0.004074 | Rras2     | 1.342118   | 0.00634  | Mgat5b   | -1.90932   | 0.005972 | Specc1         |  |                  |  |                |  | Myh9       |  | Gfod1       |  | Slc37a2       |  | Rnf150        |  |
| Mdfic     | 1.384066   | 0.003291 | Speg      | -1.33874   | 0.004485 | Luzp1     | 1.455102   | 0.006345 | Zbtb7c   | -1.31804   | 0.006008 |                |  |                  |  |                |  | Tshb       |  | Zfp651      |  | 9930012k11rik |  | Lrrc49        |  |
| Uprt      | 1.526775   | 0.003451 | Dpysl2    | -1.35147   | 0.005537 | Samd4     | 1.331737   | 0.007104 | Ddn      | -1.40465   | 0.006662 |                |  |                  |  |                |  | Slc39a6    |  | Luzp1       |  | Aard          |  | Rarres1       |  |
| Btg2      | 1.766076   | 0.003559 | Snx31     | -1.51076   | 0.005828 | Kank2     | 1.268392   | 0.007613 | Kctd11   | -1.48344   | 0.006707 |                |  |                  |  |                |  | Iqgap1     |  | Ucp2        |  | Cables1       |  | Ptchd4        |  |
| Gpsm3     | 1.654924   | 0.003736 | Mgat5     | -1.31468   | 0.005961 | Rusc2     | 1.446534   | 0.008753 | Gja3     | -1.81858   | 0.008539 |                |  |                  |  |                |  | Gsdmd      |  | Dtx4        |  | Sspn          |  | Ptpro         |  |
| Stxbp1    | 1.328286   | 0.003773 | Crb2      | -1.36091   | 0.005986 | Megf9     | 1.485516   | 0.008779 | Inf2     | -1.22541   | 0.008969 |                |  |                  |  |                |  | Svep1      |  | Rusc2       |  | Abca9         |  | Sema6c        |  |
| Dock4     | 1.452117   | 0.004088 | Mapt      | -1.24829   | 0.006279 | PlekHG2   | 1.438527   | 0.009198 | Npr1     | -1.35646   | 0.00985  |                |  |                  |  |                |  | Actn4      |  | PlekHG2     |  | Col1a2        |  | Foxc2         |  |
| Tnfrsf12a | 1.668729   | 0.004167 | Slc9a3r2  | -1.28093   | 0.006358 | Arl4c     | 1.262384   | 0.009836 | Bhlhe41  | -1.64643   | 0.010153 |                |  |                  |  |                |  | Gm14403    |  | Btg3        |  | Pcsk6         |  | St6gal1       |  |
| Hip1      | 2.069195   | 0.004176 | Pfifibp2  | -1.35501   | 0.006384 | Atf3      | 2.354615   | 0.009886 | E2f1     | -1.3542    | 0.010667 |                |  |                  |  |                |  | Gm10509    |  | Map1b       |  | E330009j07rik |  | Rhpn1         |  |
| Serpinb6a | 1.842827   | 0.00462  | Arhgef26  | -1.61308   | 0.006404 | Plekha2   | 1.54473    | 0.009895 | Sgip1    | -1.58544   | 0.011775 |                |  |                  |  |                |  | Rab13      |  | Gadd45b     |  | Tyro3         |  | Hs3st6        |  |
| Golm1     | 1.473156   | 0.006579 | Vegfa     | -1.29134   | 0.006549 | Creb3l1   | 1.515865   | 0.01146  | Hs3st6   | -1.37243   | 0.011931 |                |  |                  |  |                |  | Fam114a1   |  | Ajuba       |  | Vash1         |  | Map1a         |  |
| Tmem47    | 1.582919   | 0.00709  | Man1a2    | -1.41437   | 0.007547 | Zfp651    | 1.458633   | 0.011864 | Pmp22    | -1.46617   | 0.012452 |                |  |                  |  |                |  | Atp1b2     |  | Srf         |  | Man1a2        |  | Pde4b         |  |
| Unc13b    | 1.530582   | 0.007776 | Extl1     | -1.61915   | 0.007634 | Irgm2     | 3.124269   | 0.013105 | C1qtnf7  | -1.40376   | 0.012947 |                |  |                  |  |                |  | Prkci      |  | Dusp8       |  | Foxd2         |  | Mmp23         |  |
| Ehd4      | 1.347186   | 0.008207 | Lct1      | -2.24412   | 0.007799 | Cyr61     | 1.561235   | 0.01314  | Map1a    | -1.37063   | 0.013846 |                |  |                  |  |                |  | Ncf2       |  | Amotl2      |  | Fzd2          |  | Npr1          |  |
| Parp12    | 1.649419   | 0.009799 | Col4a3    | -1.36292   | 0.007974 | Cry1      | 2.032604   | 0.015694 | Nxn      | -1.36854   | 0.014209 |                |  |                  |  |                |  | Rarb       |  | Rnasel      |  | Ap1p1         |  | E2f1          |  |
| Rarb      | 1.470409   | 0.01059  | Ccdc92    | -1.297     | 0.008949 | Arhgap19  | 1.686944   | 0.0165   | Sema6c   | -1.40529   | 0.014847 |                |  |                  |  |                |  | Esyt1      |  | Hivep2      |  | Col4a3        |  | Hs3st3a1      |  |
| Sipa1l2   | 1.366458   | 0.011093 | Foxl1     | -1.73775   | 0.009552 | Dusp8     | 1.383366   | 0.016741 | Bambi    | -1.6815    | 0.020994 |                |  |                  |  |                |  | Emp2       |  | Parp4       |  | Crb2          |  | Wt1           |  |
| Pde3b     | 1.400011   | 0.011808 | Wsb2      | -1.54574   | 0.009933 | Nedd9     | 1.291403   | 0.017204 | St6gal1  | -1.38633   | 0.021566 |                |  |                  |  |                |  | Dock4      |  | Samd4       |  | Kirrel        |  | Zbtb7c        |  |
| Slco2a1   | 1.467489   | 0.012057 | Lrrc10b   | -2.60136   | 0.010035 | Emilin1   | 1.372448   | 0.020194 | Mylk3    | -1.75875   | 0.023846 |                |  |                  |  |                |  | Ormdl3     |  | Pvrl4       |  | Pfifibp2      |  | Ksr1          |  |
| Emp2      | 1.462753   | 0.015325 | Col1a2    | -1.48412   | 0.011067 | Gfod1     | 1.48017    | 0.020813 | Ube2ql1  | -1.4983    | 0.026237 |                |  |                  |  |                |  | Myl12a     |  | Nck2        |  | Mtcl1         |  | Pak1          |  |
| Pros1     | 1.439212   | 0.01555  | Fxyd6     | -1.83457   | 0.011556 | Synj2     | 1.625224   | 0.021086 | Wt1      | -1.33104   | 0.027635 |                |  |                  |  |                |  | Prmt2      |  | Gab2        |  | Dpysl2        |  | Nod1          |  |
| Megf9     | 1.429732   | 0.015662 | Zbtb8a    | -1.51447   | 0.011586 | Dtx4      | 1.449586   | 0.022794 | Glp1r    | -1.64856   | 0.028447 |                |  |                  |  |                |  | Mdfic      |  | Aif1l       |  | Speg          |  | Trib2         |  |
| Cyr61     | 1.386354   | 0.015881 | Sspn      | -1.48785   | 0.011963 | Mtch1     | 1.25721    | 0.023434 | Pde4b    | -1.37049   | 0.029575 |                |  |                  |  |                |  | St3gal1    |  | Sash1       |  | Rassf10       |  | Inf2          |  |
| Actn1     | 2.952103   | 0.01623  | 2010300c0 | -1.69208   | 0.013247 | Otud7b    | 1.214544   | 0.025736 | Hs3st3a1 | -1.3481    | 0.030151 |                |  |                  |  |                |  | Sipa1l2    |  | Nedd9       |  | Galnt10       |  | Top1mt        |  |
| Myl12a    | 1.393525   | 0.016235 | Cry1      | -2.06005   | 0.013252 | H2-Q6     | 1.557867   | 0.026301 | Mmp23    | -1.36187   | 0.031114 |                |  |                  |  |                |  | Eif3m      |  | Kank2       |  | Plekho1       |  | Tns2          |  |
| H2-Q6     | 1.473852   | 0.017153 | Txlnb     | -1.89957   | 0.013546 | Srf       | 1.390998   | 0.026756 | Ptpro    | -1.40821   | 0.032189 |                |  |                  |  |                |  | Stxbp1     |  | Arl4c       |  | Ntng2         |  |               |  |
| Myh9      | 2.833041   | 0.0173   | E330009j0 | -1.44197   | 0.015579 | Efhd2     | 1.349736   | 0.027254 | Ksr1     | -1.3106    | 0.034072 |                |  |                  |  |                |  | Cas2       |  | Mtch1       |  | Foxc1         |  |               |  |
| F2r       | 1.391527   | 0.018785 | Abca9     | -1.48421   | 0.017543 | Map1b     | 1.409231   | 0.027315 | Trib2    | -1.24233   | 0.034376 |                |  |                  |  |                |  | Anxa3      |  | Kif5b       |  | Mgat5         |  |               |  |
| Tubb2b    | 1.350163   | 0.02272  | Gja3      | -2.02905   | 0.018054 | Hivep2    | 1.337238   | 0.027401 | Adcy5    | -1.22948   | 0.0346   |                |  |                  |  |                |  | PlekHG1    |  | Ldlrap1     |  | Sox5          |  |               |  |
| Tshb      | 1.749532   | 0.022838 | Mxra7     | -1.30495   | 0.018119 | Ifngr1    | 1.467761   | 0.028232 | Plat     | -1.24988   | 0.034773 |                |  |                  |  |                |  | Calm2      |  | Pard6b      |  | Marveld1      |  |               |  |
| St3gal1   | 1.371854   | 0.022857 | Ap1p1     | -1.38127   | 0.018131 | Adamts4   | 1.944099   | 0.028419 | Dync1i1  | -1.60814   | 0.035088 |                |  |                  |  |                |  | Epb4.1l5   |  | Otud7b      |  | Mxra7         |  |               |  |
| Cas2      | 1.325038   | 0.024264 | Chst1     | -1.46421   | 0.01924  | Nck2      | 1.31624    | 0.02995  | Rarres1  | -1.43855   | 0.035418 |                |  |                  |  |                |  | Fndc3b     |  | Elmo2       |  | Ccdc92        |  |               |  |
| Cd2ap     | 1.207283   | 0.024601 | Plat      | -1.42161   | 0.01981  | Fosl2     | 1.501312   | 0.030953 | Ptchd4   | -1.43522   | 0.035738 |                |  |                  |  |                |  | Psd3       |  | Ldlrap1     |  | Rcsd1         |  |               |  |
| Esyt1     | 1.469974   | 0.02504  | Efhd2     | -1.35397   | 0.0205   | Ehd4      | 1.242654   | 0.03142  | Snx31    | -1.45055   | 0.03638  |                |  |                  |  |                |  | Cd2ap      |  | Pard6b      |  | Vegfa         |  |               |  |
| Ncf2      | 1.481156   | 0.025768 | Pag1      | -1.25544   | 0.020759 | Charp     | 1.609474   | 0.031607 | Sptbn5   | -1.55172   | 0.036952 |                |  |                  |  |                |  | Mpp5       |  | Otud7b      |  | Plxnb1        |  |               |  |
| Emilin1   | 1.564568   | 0.025964 | Metrl     | -1.37366   | 0.021008 | Mmp17     | 1.81048    | 0.03331  | Sox8     | -1.81314   | 0.038085 |                |  |                  |  |                |  |            |  | Elmo2       |  | Slc9a3r2      |  |               |  |
| PlekHG1   | 1.290685   | 0.027695 | Nxn       | -1.48582   | 0.022153 | Btg3      | 1.433692   | 0.033392 | Lgals2   | -2.85298   | 0.038252 |                |  |                  |  |                |  |            |  |             |  | Pbx2          |  |               |  |
| Slc39a6   | 1.555281   | 0.028597 | Plekho1   | -1.33207   | 0.022719 | Tnfrsf12a | 1.5668     | 0.03358  | Pak1     | -1.27771   | 0.041896 |                |  |                  |  |                |  |            |  |             |  | Pag1          |  |               |  |
| Psd3      | 1.229128   |          |           |            |          |           |            |          |          |            |          |                |  |                  |  |                |  |            |  |             |  |               |  |               |  |
