# Supplementary material
Source: publisher figshare collection journal article supplement (https://diabetesjournals.figshare.com/articles/dataset/_/14888034)
Supplement: Supplementary file 7 [file 1]

| Category | Term                                                                                                                     | Count | %     | PValue   | Genes                                                                                                                                                                                                                                                  | List Total | Pop Hits | Pop Total | Fold Enrichment | Bonferroni  | Benjamini  | FDR      |
|----------|--------------------------------------------------------------------------------------------------------------------------|-------|-------|----------|--------------------------------------------------------------------------------------------------------------------------------------------------------------------------------------------------------------------------------------------------------|------------|----------|-----------|-----------------|-------------|------------|----------|
| GO_BP    | GO:0032835~glomerulus development                                                                                        | 4     | 3.23  | 1.79E-05 | WT1, PTPRO, TCF21, PLCE1                                                                                                                                                                                                                               | 111        | 9        | 18082     | 72.4004004      | 0.012640745 | 0.01270329 | 0.01265  |
| GO_BP    | GO:0072015~glomerular visceral epithelial cell development                                                               | 4     | 3.23  | 4.63E-05 | NPFS1, PODXL, WT1, MAGI2                                                                                                                                                                                                                               | 111        | 12       | 18082     | 54.3003003      | 0.032342694 | 0.01641511 | 0.016346 |
| GO_MF    | GO:0043565~sequence-specific DNA binding                                                                                 | 13    | 10.48 | 3.85E-04 | FOXC2, ZFP423, FOXD2, FOXD1, FOXL1, MAFA, NR4A1, NR4A3, MAFB, WT1, E2F1, LMX1B, HOXC8                                                                                                                                                                  | 105        | 633      | 17446     | 3.412292184     | 0.076633926 | 0.07971416 | 0.079714 |
| GO_BP    | GO:0007275~multicellular organism development                                                                            | 17    | 13.71 | 4.84E-04 | ROBO2, NTNG2, FOXC2, ZFP423, PRM1, FZD2, FOXD1, WIPF3, SHISA3, SEMA3E, TDRD5, NPFS1, WIF1, LMX1B, HOXC8, NES, GAS7                                                                                                                                     | 111        | 1029     | 18082     | 2.691268528     | 0.290691134 | 0.11429917 | 0.113816 |
| KEGG     | mmu04360:Axon guidance                                                                                                   | 6     | 4.84  | 7.09E-04 | ROBO2, NTNG2, ABLIM3, SEMA3G, SEMA3E, SRGAP1                                                                                                                                                                                                           | 44         | 129      | 7691      | 8.130021142     | 0.069816008 | 0.07305649 | 0.073056 |
| GO_BP    | GO:0072112~glomerular visceral epithelial cell differentiation                                                           | 3     | 2.42  | 7.55E-04 | FOXC2, WT1, PTPRO                                                                                                                                                                                                                                      | 111        | 7        | 18082     | 69.81467181     | 0.415039113 | 0.13381323 | 0.133247 |
| GO_BP    | GO:0019933~cAMP-mediated signaling                                                                                       | 4     | 3.23  | 0.001046 | KSR1, NPR3, ADM, ADCY1                                                                                                                                                                                                                                 | 111        | 33       | 18082     | 19.74556375     | 0.524478848 | 0.14072696 | 0.140132 |
| GO_MF    | GO:0001077~transcriptional activator activity, RNA polymerase II core promoter proximal region sequence-specific binding | 8     | 6.45  | 0.001166 | NR4A1, FOXC2, MAFB, NR4A3, FOXD1, WT1, TCF21, MAFA                                                                                                                                                                                                     | 105        | 270      | 17446     | 4.92303351      | 0.21451931  | 0.12065932 | 0.120659 |
| GO_BP    | GO:0001822~kidney development                                                                                            | 6     | 4.84  | 0.001191 | CDKN1C, ROBO2, FOXC2, FOXD1, WT1, TCF21                                                                                                                                                                                                                | 111        | 130      | 18082     | 7.518503119     | 0.570896268 | 0.14072696 | 0.140132 |
| GO_BP    | GO:0001657~ureteric bud development                                                                                      | 4     | 3.23  | 0.003105 | ROBO2, FOXC2, WT1, TCF21                                                                                                                                                                                                                               | 111        | 48       | 18082     | 13.57507508     | 0.890084146 | 0.28197156 | 0.280778 |
| GO_BP    | GO:0071850~mitotic cell cycle arrest                                                                                     | 3     | 2.42  | 0.003182 | GADD45A, MAGI2, CDC14A                                                                                                                                                                                                                                 | 111        | 14       | 18082     | 34.90733591     | 0.895915821 | 0.28197156 | 0.280778 |
| GO_BP    | GO:0007399~nervous system development                                                                                    | 8     | 6.45  | 0.008233 | ROBO2, NTNG2, ZFP423, MAGI2, SEMA3E, GDPD5, NES, GAS7                                                                                                                                                                                                  | 111        | 377      | 18082     | 3.456783043     | 0.997176518 | 0.64859494 | 0.645851 |
| GO_BP    | GO:0008360~regulation of cell shape                                                                                      | 5     | 4.03  | 0.010305 | ANXA1, WIPF3, PLEKHO1, SEMA3E, GAS7                                                                                                                                                                                                                    | 111        | 139      | 18082     | 5.859744637     | 0.999360279 | 0.73062145 | 0.72753  |
| GO_MF    | GO:0005515~protein binding                                                                                               | 36    | 29.03 | 0.011556 | RAB3B, CDKN1C, ZFP423, HSPB8, PTPRO, RASL11A, TCF21, ITPR3, RAVR2, E2F1, SRGAP1, ZBTB7C, NTNG2, KIRREL, FZD2, ANXA1, KSR1, GADD45A, APLP1, MAGI2, NGB, FNDC5, CLDN5, NR4A1, EHD2, MAFB, MYL7, NPFS1, WT1, NPFS2, PLEKHO1, VIM, NUPR1, ASTN2, SYNC, NES | 105        | 4092     | 17446     | 1.461751152     | 0.909822559 | 0.44598654 | 0.445987 |
| GO_BP    | GO:0043010~camera-type eye development                                                                                   | 4     | 3.23  | 0.011976 | CDKN1C, FOXC2, WT1, LMX1B                                                                                                                                                                                                                              | 111        | 78       | 18082     | 8.353892354     | 0.999807334 | 0.77193166 | 0.768665 |
| KEGG     | mmu04925:Aldosterone synthesis and secretion                                                                             | 4     | 3.23  | 0.012073 | NR4A1, NPR1, ITPR3, ADCY1                                                                                                                                                                                                                              | 44         | 86       | 7691      | 8.130021142     | 0.710293973 | 0.62173385 | 0.621734 |
| GO_MF    | GO:0017147~Wnt-protein binding                                                                                           | 3     | 2.42  | 0.013734 | FZD2, WIF1, PTPRO                                                                                                                                                                                                                                      | 105        | 30       | 17446     | 16.6152381      | 0.942878392 | 0.44598654 | 0.445987 |
| GO_MF    | GO:0003779~actin binding                                                                                                 | 7     | 5.65  | 0.015728 | PLEKHH2, INF2, ABLIM3, NEBL, WIPF3, SYNPO, CORO2B                                                                                                                                                                                                      | 105        | 338      | 17446     | 3.441025641     | 0.962433676 | 0.44598654 | 0.445987 |
| GO_MF    | GO:0003700~transcription factor activity, sequence-specific DNA binding                                                  | 12    | 9.68  | 0.016084 | NR4A1, FOXC2, FOXD2, MAFB, NR4A3, FOXD1, WT1, E2F1, FOXL1, LMX1B, MAFA, HOXC8                                                                                                                                                                          | 105        | 883      | 17446     | 2.258016502     | 0.965138678 | 0.44598654 | 0.445987 |
| GO_MF    | GO:0030144~alpha-1,6-mannosylglycoprotein 6-beta-N-acetylglucosaminyltransferase activity                                | 2     | 1.61  | 0.017778 | MGAT5, MGAT5B                                                                                                                                                                                                                                          | 105        | 3        | 17446     | 110.768254      | 0.975601388 | 0.44598654 | 0.445987 |
| GO_MF    | GO:0016941~natriuretic peptide receptor activity                                                                         | 2     | 1.61  | 0.017778 | NPR1, NPR3                                                                                                                                                                                                                                             | 105        | 3        | 17446     | 110.768254      | 0.975601388 | 0.44598654 | 0.445987 |
| GO_BP    | GO:0045944~positive regulation of transcription from RNA polymerase II promoter                                          | 13    | 10.48 | 0.017819 | FOXC2, FOXD1, TCF21, MAFA, DDN, NR4A1, NR4A3, MAFB, ABLIM3, WT1, E2F1, LMX1B, ZBTB7C                                                                                                                                                                   | 111        | 995      | 18082     | 2.128353479     | 0.999997142 | 0.90845757 | 0.904614 |
| GO_BP    | GO:0045103~intermediate filament-based process                                                                           | 2     | 1.61  | 0.01814  | VIM, SYNC                                                                                                                                                                                                                                              | 111        | 3        | 18082     | 108.6006006     | 0.999997735 | 0.90845757 | 0.904614 |
| GO_BP    | GO:0006487~protein N-linked glycosylation                                                                                | 3     | 2.42  | 0.020194 | MGAT5, MGAT5B, ST3GAL1                                                                                                                                                                                                                                 | 111        | 36       | 18082     | 13.57507508     | 0.999999488 | 0.90845757 | 0.904614 |
| GO_BP    | GO:0030513~positive regulation of BMP signaling pathway                                                                  | 3     | 2.42  | 0.020194 | CRB2, ZFP423, FOXD1                                                                                                                                                                                                                                    | 111        | 36       | 18082     | 13.57507508     | 0.999999488 | 0.90845757 | 0.904614 |
| GO_BP    | GO:0001656~metanephros development                                                                                       | 3     | 2.42  | 0.022358 | ROBO2, FOXC2, WT1                                                                                                                                                                                                                                      | 111        | 38       | 18082     | 12.86059744     | 0.999999893 | 0.90845757 | 0.904614 |
| GO_BP    | GO:0030199~collagen fibril organization                                                                                  | 3     | 2.42  | 0.023474 | FOXC2, LMX1B, LOXL2                                                                                                                                                                                                                                    | 111        | 39       | 18082     | 12.53083853     | 0.999999953 | 0.90845757 | 0.904614 |
| GO_MF    | GO:0019834~phospholipase A2 inhibitor activity                                                                           | 2     | 1.61  | 0.023635 | ANXA1, ANXA3                                                                                                                                                                                                                                           | 105        | 4        | 17446     | 83.07619048     | 0.99292448  | 0.44598654 | 0.445987 |
| GO_MF    | GO:0043533~inositol 1,3,4,5 tetrakisphosphate binding                                                                    | 2     | 1.61  | 0.023635 | ITPR3, ASTN2                                                                                                                                                                                                                                           | 105        | 4        | 17446     | 83.07619048     | 0.99292448  | 0.44598654 | 0.445987 |
| GO_MF    | GO:0005509~calcium ion binding                                                                                           | 10    | 8.06  | 0.0237   | CRB2, EHD2, ANXA1, MYL7, ANXA3, PROS1, ITPR3, MCC, RHBDL3, ASTN2                                                                                                                                                                                       | 105        | 699      | 17446     | 2.377001158     | 0.993021497 | 0.44598654 | 0.445987 |
| GO_BP    | GO:0071376~cellular response to corticotropin-releasing hormone stimulus                                                 | 2     | 1.61  | 0.024114 | NR4A1, NR4A3                                                                                                                                                                                                                                           | 111        | 4        | 18082     | 81.45045045     | 0.99999997  | 0.90845757 | 0.904614 |
| GO_BP    | GO:0045893~positive regulation of transcription, DNA-templated                                                           | 9     | 7.26  | 0.024345 | CDKN1C, NR4A1, FOXC2, ZFP423, FZD2, NR4A3, WT1, E2F1, MAFA                                                                                                                                                                                             | 111        | 576      | 18082     | 2.545326577     | 0.999999975 | 0.90845757 | 0.904614 |
| GO_MF    | GO:0008467~[heparan sulfate]-glucosamine 3-sulfotransferase 1 activity                                                   | 2     | 1.61  | 0.029456 | HS3ST3A1, HS3ST6                                                                                                                                                                                                                                       | 105        | 5        | 17446     | 66.46095238     | 0.997948268 | 0.50812192 | 0.508122 |
| KEGG     | mmu04110:Cell cycle                                                                                                      | 4     | 3.23  | 0.031616 | CDKN1C, GADD45A, E2F1, CDC14A                                                                                                                                                                                                                          | 44         | 124      | 7691      | 5.63856305      | 0.962256487 | 0.92392082 | 0.923921 |
| GO_BP    | GO:0001658~branching involved in ureteric bud morphogenesis                                                              | 3     | 2.42  | 0.034497 | FOXD1, WT1, TCF21                                                                                                                                                                                                                                      | 111        | 48       | 18082     | 10.18130631     | 1           | 1          | 0.997175 |
| GO_MF    | GO:0004859~phospholipase inhibitor activity                                                                              | 2     | 1.61  | 0.035244 | ANXA1, ANXA3                                                                                                                                                                                                                                           | 105        | 6        | 17446     | 55.38412698     | 0.999405089 | 0.53064375 | 0.530644 |
| GO_MF    | GO:0016757~transferase activity, transferring glycosyl groups                                                            | 5     | 4.03  | 0.035889 | MGAT5, MGAT5B, ST3GAL1, GALNT10, ST6GALNAC6                                                                                                                                                                                                            | 105        | 208      | 17446     | 3.994047619     | 0.999482034 | 0.53064375 | 0.530644 |
| GO_BP    | GO:0007096~regulation of exit from mitosis                                                                               | 2     | 1.61  | 0.035955 | CDKN1C, CDC14A                                                                                                                                                                                                                                         | 111        | 6        | 18082     | 54.3003003      | 1           | 1          | 0.997175 |
| GO_MF    | GO:0008146~sulfotransferase activity                                                                                     | 3     | 2.42  | 0.039832 | HS3ST3A1, CHST1, HS3ST6                                                                                                                                                                                                                                | 105        | 53       | 17446     | 9.404851752     | 0.999778221 | 0.54967501 | 0.549675 |
| GO_BP    | GO:0061469~regulation of type B pancreatic cell proliferation                                                            | 2     | 1.61  | 0.041821 | NR4A1, NR4A3                                                                                                                                                                                                                                           | 111        | 7        | 18082     | 46.54311454     | 1           | 1          | 0.997175 |
| GO_BP    | GO:0031100~organ regeneration                                                                                            | 3     | 2.42  | 0.045651 | NR4A3, ANXA3, ADM                                                                                                                                                                                                                                      | 111        | 56       | 18082     | 8.726833977     | 1           | 1          | 0.997175 |
| GO_MF    | GO:0046977~TAP binding                                                                                                   | 2     | 1.61  | 0.046716 | H2-Q6, H2-Q7                                                                                                                                                                                                                                           | 105        | 8        | 17446     | 41.53809524     | 0.999949994 | 0.56883533 | 0.568835 |
| GO_MF    | GO:0038191~neuropilin binding                                                                                            | 2     | 1.61  | 0.046716 | SEMA3G, SEMA3E                                                                                                                                                                                                                                         | 105        | 8        | 17446     | 41.53809524     | 0.999949994 | 0.56883533 | 0.568835 |
| GO_BP    | GO:0030154~cell differentiation                                                                                          | 10    | 8.06  | 0.048235 | ROBO2, NTNG2, ZFP423, PRM1, WIPF3, SPEG, SEMA3E, THSD7A, TDRD5, GAS7                                                                                                                                                                                   | 111        | 780      | 18082     | 2.088473088     | 1           | 1          | 0.997175 |
| KEGG     | mmu04921:Oxytocin signaling pathway                                                                                      | 4     | 3.23  | 0.050896 | NPR1, KCNJ12, ITPR3, ADCY1                                                                                                                                                                                                                             | 44         | 150      | 7691      | 4.661212121     | 0.995146901 | 0.92392082 | 0.923921 |
| GO_MF    | GO:0005198~structural molecule activity                                                                                  | 5     | 4.03  | 0.052727 | CLDN5, ANXA1, VIM, SYNC, NES                                                                                                                                                                                                                           | 105        | 236      | 17446     | 3.520177563     | 0.999986501 | 0.60636605 | 0.606366 |
| GO_BP    | GO:0060539~diaphragm development                                                                                         | 2     | 1.61  | 0.053449 | WT1, TCF21                                                                                                                                                                                                                                             | 111        | 9        | 18082     | 36.2002002      | 1           | 1          | 0.997175 |

|       |                                                                                  |    |       |          |                                                                                                                             |     |      |       |             |             |            |          |
|-------|----------------------------------------------------------------------------------|----|-------|----------|-----------------------------------------------------------------------------------------------------------------------------|-----|------|-------|-------------|-------------|------------|----------|
| GO_BP | GO:0060541~respiratory system development                                        | 2  | 1.61  | 0.053449 | TCF21, SPEG                                                                                                                 | 111 | 9    | 18082 | 36.2002002  | 1           | 1          | 0.997175 |
| GO_BP | GO:0032836~glomerular basement membrane development                              | 2  | 1.61  | 0.053449 | NPHS1, WT1                                                                                                                  | 111 | 9    | 18082 | 36.2002002  | 1           | 1          | 0.997175 |
| GO_BP | GO:0043065~positive regulation of apoptotic process                              | 6  | 4.84  | 0.053866 | NR4A1, ANXA1, GADD45A, WT1, ADM, NUPR1                                                                                      | 111 | 335  | 18082 | 2.917628076 | 1           | 1          | 0.997175 |
| GO_BP | GO:0030036~actin cytoskeleton organization                                       | 4  | 3.23  | 0.055784 | EHD2, INF2, ABLIM3, CORO2B                                                                                                  | 111 | 142  | 18082 | 4.588757772 | 1           | 1          | 0.997175 |
| KEGG  | mmu04514:Cell adhesion molecules (CAMs)                                          | 4  | 3.23  | 0.061348 | NTNG2, CLDN5, H2-Q6, H2-Q7                                                                                                  | 44  | 162  | 7691  | 4.315937149 | 0.998431538 | 0.92392082 | 0.923921 |
| GO_BP | GO:0007204~positive regulation of cytosolic calcium ion concentration            | 4  | 3.23  | 0.061613 | FZD2, C1QTNF1, ITPR3, ADM                                                                                                   | 111 | 148  | 18082 | 4.402727051 | 1           | 1          | 0.997175 |
| GO_BP | GO:0007411~axon guidance                                                         | 4  | 3.23  | 0.062611 | ROBO2, NR4A3, FOXD1, PTPRO                                                                                                  | 111 | 149  | 18082 | 4.373178548 | 1           | 1          | 0.997175 |
| GO_BP | GO:0030855~epithelial cell differentiation                                       | 3  | 2.42  | 0.062804 | FZD2, WT1, TCF21                                                                                                            | 111 | 67   | 18082 | 7.29407019  | 1           | 1          | 0.997175 |
| GO_BP | GO:0006351~transcription, DNA-templated                                          | 18 | 14.52 | 0.063341 | FOXC2, ZFP423, FOXD2, FOXD1, RASL11A, TCF21, FOXL1, MAFA, LOXL2, NR4A1, NR4A3, MAFB, ABLIM3, WT1, E2F1, LMX1B, NUPR1, HOXC8 | 111 | 1885 | 18082 | 1.555552369 | 1           | 1          | 0.997175 |
| KEGG  | mmu05202:Transcriptional misregulation in cancer                                 | 4  | 3.23  | 0.064108 | NR4A3, WT1, PLAT, NUPR1                                                                                                     | 44  | 165  | 7691  | 4.237465565 | 0.998838474 | 0.92392082 | 0.923921 |
| KEGG  | mmu05166:HTLV-I infection                                                        | 5  | 4.03  | 0.067124 | FZD2, H2-Q6, H2-Q7, E2F1, ADCY1                                                                                             | 44  | 276  | 7691  | 3.166584321 | 0.999164328 | 0.92392082 | 0.923921 |
| GO_MF | GO:0030881~beta-2-microglobulin binding                                          | 2  | 1.61  | 0.074809 | H2-Q6, H2-Q7                                                                                                                | 105 | 13   | 17446 | 25.56190476 | 0.999999898 | 0.791808   | 0.791808 |
| GO_BP | GO:0007507~heart development                                                     | 5  | 4.03  | 0.075143 | ROBO2, FOXC2, WT1, ADM, FOXL1                                                                                               | 111 | 261  | 18082 | 3.120706914 | 1           | 1          | 0.997175 |
| GO_MF | GO:0042802~identical protein binding                                             | 8  | 6.45  | 0.07977  | ROBO2, CLDN5, FOXC2, HSPB8, APLP1, VIM, SNCAIP, ACPP                                                                        | 105 | 625  | 17446 | 2.126750476 | 0.999999966 | 0.791808   | 0.791808 |
| GO_MF | GO:0042608~T cell receptor binding                                               | 2  | 1.61  | 0.080328 | H2-Q6, H2-Q7                                                                                                                | 105 | 14   | 17446 | 23.73605442 | 0.99999997  | 0.791808   | 0.791808 |
| KEGG  | mmu00533:Glycosaminoglycan biosynthesis - keratan sulfate                        | 2  | 1.61  | 0.080731 | CHST1, ST3GAL1                                                                                                              | 44  | 15   | 7691  | 23.30606061 | 0.999813298 | 0.92392082 | 0.923921 |
| KEGG  | mmu00604:Glycosphingolipid biosynthesis - ganglio series                         | 2  | 1.61  | 0.080731 | ST3GAL1, ST6GALNAC6                                                                                                         | 44  | 15   | 7691  | 23.30606061 | 0.999813298 | 0.92392082 | 0.923921 |
| GO_BP | GO:0042417~dopamine metabolic process                                            | 2  | 1.61  | 0.081909 | NPR1, SNCAIP                                                                                                                | 111 | 14   | 18082 | 23.27155727 | 1           | 1          | 0.997175 |
| GO_BP | GO:0007050~cell cycle arrest                                                     | 3  | 2.42  | 0.087199 | CDKN1C, GADD45A, VASH1                                                                                                      | 111 | 81   | 18082 | 6.0333667   | 1           | 1          | 0.997175 |
| GO_BP | GO:0045197~establishment or maintenance of epithelial cell apical/basal polarity | 2  | 1.61  | 0.087498 | CRB2, MTCL1                                                                                                                 | 111 | 15   | 18082 | 21.72012012 | 1           | 1          | 0.997175 |
| GO_BP | GO:0007588~excretion                                                             | 2  | 1.61  | 0.087498 | KIRREL, NPHS2                                                                                                               | 111 | 15   | 18082 | 21.72012012 | 1           | 1          | 0.997175 |
| GO_MF | GO:0030695~GTPase regulator activity                                             | 2  | 1.61  | 0.09127  | RHPN1, GPSM3                                                                                                                | 105 | 16   | 17446 | 20.76904762 | 0.999999998 | 0.85876322 | 0.858763 |
| GO_BP | GO:0006171~cAMP biosynthetic process                                             | 2  | 1.61  | 0.093054 | ADM, ADCY1                                                                                                                  | 111 | 16   | 18082 | 20.36261261 | 1           | 1          | 0.997175 |
| GO_BP | GO:0014002~astrocyte development                                                 | 2  | 1.61  | 0.098576 | TSPAN2, VIM                                                                                                                 | 111 | 17   | 18082 | 19.16481187 | 1           | 1          | 0.997175 |

| Category | Term                                                                                       | Count | %     | PValue   | Genes                                                                                                                                                                                                                                                                                                                                                                                                                                                                                                                                                                                                                                                                                                                                                                                                                                                                                                                                                                                                                                                                                                                                                                                                                                                                                                                                                                                                                                                                                                                                                          | List Total | Pop Hits | Pop Total | Id Enrichme | Bonferroni | Benjamini | FDR      |
|----------|--------------------------------------------------------------------------------------------|-------|-------|----------|----------------------------------------------------------------------------------------------------------------------------------------------------------------------------------------------------------------------------------------------------------------------------------------------------------------------------------------------------------------------------------------------------------------------------------------------------------------------------------------------------------------------------------------------------------------------------------------------------------------------------------------------------------------------------------------------------------------------------------------------------------------------------------------------------------------------------------------------------------------------------------------------------------------------------------------------------------------------------------------------------------------------------------------------------------------------------------------------------------------------------------------------------------------------------------------------------------------------------------------------------------------------------------------------------------------------------------------------------------------------------------------------------------------------------------------------------------------------------------------------------------------------------------------------------------------|------------|----------|-----------|-------------|------------|-----------|----------|
| GO_MF    | GO:0005515~protein binding                                                                 | 213   | 29.38 | 5.40E-11 | TDRKH, SPARC, SCX, RASSF2, ALCAM, DPYSL2, RAVR2, DAG1, SOX8, MYOZ1, EPHB1, SOX5, ANKS1B, CDON, PRKCI, RBFOX2, ACTN1, UNC5C, ACTN4, CD2AP, FNDC5, CLDN5, MYL6, MYL7, MAP1B, MAP1A, ASTN2, NBL1, OPTN, EPHA2, SPTBN5, NECAB3, STXBP1, IQGAP1, EPB41L5, FLRT2, MAP4, CHST14, PAG1, ZBTB7C, NTNG2, JUN, DTNA, FZD2, GADD45B, GADD45A, PBX2, PARVA, GDF5, VASN, EHD2, COL1A2, EHD4, FAT1, CDKN1C, BTG3, BTG2, HIP1, SLC44A2, SETD7, PTPRO, WFIKKN2, BHLHE41, OTUD7B, TCF21, STON2, SH3PXD2A, TMSB4X, PRX, ANKRD1, SH3BGRL2, RSPO1, LDLRAP1, TEAD4, ANXA1, ANXA2, PRMT2, TNFRSF12A, RRAS2, GAB2, CBFA2T3, SYN1, MDFIC, GAS1, PLEKHO1, TLR7, GLCCI1, MAPT, MYZAP, SYNC, MICU1, CRYAB, VAMP2, ARF6, PELI3, NKD1, ARNTL, RELB, ADCY5, PAK1, ARVCF, PLAGL1, DYNC1I1, GSN, SLC31A2, PLEKHA2, NDE1, WTIP, MPP5, VEGFA, TJP1, RIT1, WT1, APBA1, FRYL, RAB3B, STEAP3, NCF2, RASL11A, DACH1, KIF5B, SIRPA, DENND5A, LARGE1, BORCS6, NSF, CHRN1, KIRREL2, APLP1, MAGI2, ARMCX3, MYCL, FRMD6, ELMO1, FKBP7, AMPH, NUPR1, UTRN, AJUBA, HPCA, HTRA1, ITPR3, NREP, KLC1, AGER, NPAS2, SLC9A3R2, EFN1, NDN, SMYD1, KIF3C, ASIC2, SRGAP2, SRGAP1, PDZD7, WNT4, KIRREL, MLKL, ATP8B2, SYT9, SMAD6, TJAP1, ARHGAP33, NR4A2, GNAO1, NR4A1, MAFB, SERPINB6A, AMOTL2, PLXNB1, MAFK, NES, NFE2L1, FGFR2, FGFR1, BMPR1A, ITGB1, GPSM2, HSPB8, ARRB1, SYNE1, PPP1R9B, ADAMTS4, PDE4B, EFHD2, PMEPA1, LRRFIP1, PRKG1, ARHGEF12, KSR1, ITGA3, SGIP1, NGB, TGFBR3, CRY1, MYH9, ZFP423, NXN, SRF, NOD1, UACA, PARD6B, E2F1, FYN, NCAM1, LINGO1, NTRK3, PTPN12, MYO1D, TSPAN13, NPHS1, NPHS2, VIM | 608        | 4092     | 17446     | 1.493607    | 3.86E-08   | 3.86E-08  | 3.76E-08 |
| GO_BP    | GO:0030036~actin cytoskeleton organization                                                 | 24    | 3.31  | 1.06E-09 | CTTNBP2, SRF, ARHGEF17, TMOD3, SHROOM3, ARHGEF18, PARVA, CORO2B, PPP1R9B, EHD2, ABR, EPB41L5, PAK1, INF2, FMNL2, ABLIM3, PALLD, DAAM2, MOB2, TMSB4X, DLC1, SPECC1L, ELMO1, TMSB10                                                                                                                                                                                                                                                                                                                                                                                                                                                                                                                                                                                                                                                                                                                                                                                                                                                                                                                                                                                                                                                                                                                                                                                                                                                                                                                                                                              | 642        | 142      | 18082     | 4.7603      | 2.86E-06   | 2.86E-06  | 2.83E-06 |
| GO_MF    | GO:0051015~actin filament binding                                                          | 22    | 3.03  | 5.59E-09 | SPTBN5, HIP1, ACTN1, WIPF3, TPM1, SHROOM3, ACTN4, RCS1D1, IQGAP2, CORO2B, SPTB, AIF1L, PPP1R9B, SYNE1, MYO1D, MYO1E, MYH9, UTRN, AJUBA, CTNNAL1, PKNOX2, GAS7                                                                                                                                                                                                                                                                                                                                                                                                                                                                                                                                                                                                                                                                                                                                                                                                                                                                                                                                                                                                                                                                                                                                                                                                                                                                                                                                                                                                  | 608        | 132      | 17446     | 4.782346    | 3.99E-06   | 2.00E-06  | 1.95E-06 |
| GO_MF    | GO:0003779~actin binding                                                                   | 36    | 4.97  | 8.94E-09 | ITGB1, PLEKHH2, HIP1, WIPF3, HPCA, ABRA, MYLK, SYNE1, PPP1R9B, ABLIM3, MPRIP, TMSB4X, DAG1, MYOZ1, SYNPO, GSN, NEBL, ACTN1, TMOD3, TPM1, SHROOM3, PARVA, ACTN4, SPTB, CORO2B, AIF1L, MYO1D, MYO1E, INF2, FMNL2, PALLD, DAAM2, MAP1B, MAP1A, MYH9, UTRN                                                                                                                                                                                                                                                                                                                                                                                                                                                                                                                                                                                                                                                                                                                                                                                                                                                                                                                                                                                                                                                                                                                                                                                                                                                                                                         | 608        | 338      | 17446     | 3.056174    | 6.38E-06   | 2.13E-06  | 2.07E-06 |
| KEGG     | mmu04360:Axon guidance                                                                     | 21    | 2.90  | 1.71E-08 | ROBO2, SEMA5A, ITGB1, NTNG2, SEMA6C, ARHGEF12, EPHA6, SEMA3G, UNC5C, SEMA3E, EFN1, PAK1, ABLIM3, DPYSL2, NCK2, FYN, PLXNB1, SRGAP2, SRGAP1, EPHB1, EPHA2                                                                                                                                                                                                                                                                                                                                                                                                                                                                                                                                                                                                                                                                                                                                                                                                                                                                                                                                                                                                                                                                                                                                                                                                                                                                                                                                                                                                       | 270        | 129      | 7691      | 4.637123    | 3.45E-06   | 3.47E-06  | 3.14E-06 |
| GO_BP    | GO:0016477~cell migration                                                                  | 24    | 3.31  | 3.13E-07 | ITGB1, PRKCI, ENPEP, FOXC1, CD151, FNDC3B, EMP2, GAB2, VEGFA, PPP1R9B, CD2AP, PTK7, PODXL, BAMBI, PALLD, SPECC1L, ELMO1, NCK2, FAT1, ELMO2, SIRPA, SRGAP1, TNS3, EPHA2                                                                                                                                                                                                                                                                                                                                                                                                                                                                                                                                                                                                                                                                                                                                                                                                                                                                                                                                                                                                                                                                                                                                                                                                                                                                                                                                                                                         | 642        | 191      | 18082     | 3.539071    | 8.48E-04   | 4.24E-04  | 4.20E-04 |
| GO_BP    | GO:0001657~ureteric bud development                                                        | 12    | 1.66  | 6.97E-07 | ROBO2, FOXC2, FOXC1, SDC4, GDNF, WT1, TCF21, RARB, NPNT, SMAD6, FGFR2, FGFR1                                                                                                                                                                                                                                                                                                                                                                                                                                                                                                                                                                                                                                                                                                                                                                                                                                                                                                                                                                                                                                                                                                                                                                                                                                                                                                                                                                                                                                                                                   | 642        | 48       | 18082     | 7.041277    | 0.001886   | 6.29E-04  | 6.23E-04 |
| GO_BP    | GO:0072015~glomerular visceral epithelial cell development                                 | 7     | 0.97  | 1.49E-06 | MYO1E, NPHS1, PODXL, WT1, MAGI2, IQGAP1, GLCCI1                                                                                                                                                                                                                                                                                                                                                                                                                                                                                                                                                                                                                                                                                                                                                                                                                                                                                                                                                                                                                                                                                                                                                                                                                                                                                                                                                                                                                                                                                                                | 642        | 12       | 18082     | 16.42965    | 0.004031   | 0.001009  | 0.001    |
| GO_BP    | GO:0007155~cell adhesion                                                                   | 39    | 5.38  | 4.59E-06 | ITGB1, COL18A1, TENM3, ITGB5, AMIGO2, NEDD9, CYR61, DPP4, ARVCF, ALCAM, FLRT2, PODXL, EMILIN1, NCAM1, SVBP, CTNNAL1, EPHB1, CDON, CADM4, TNFRSF12A, LAMB2, ITGA3, ITGA2, APLP1, EMP2, PARVA, ATP1B2, NPNT, SULF1, BCAM, NPHS1, PTK7, SPECC1L, COL4A3, TYRO3, MYH9, NECTIN4, AJUBA, EPHA2                                                                                                                                                                                                                                                                                                                                                                                                                                                                                                                                                                                                                                                                                                                                                                                                                                                                                                                                                                                                                                                                                                                                                                                                                                                                       | 642        | 485      | 18082     | 2.264823    | 0.012353   | 0.002485  | 0.002462 |
| GO_BP    | GO:0008360~regulation of cell shape                                                        | 18    | 2.48  | 8.73E-06 | ANXA1, WIPF3, TPM1, SHROOM3, ARHGEF18, SEMA3E, PARVA, MYL12A, VEGFA, BAMBI, DLC1, S100A13, MYH9, PLEKHO1, FYN, PLXNB1, CDC42SE2, GAS7                                                                                                                                                                                                                                                                                                                                                                                                                                                                                                                                                                                                                                                                                                                                                                                                                                                                                                                                                                                                                                                                                                                                                                                                                                                                                                                                                                                                                          | 642        | 139      | 18082     | 3.64728     | 0.023356   | 0.003937  | 0.003901 |
| GO_MF    | GO:0005543~phospholipid binding                                                            | 14    | 1.93  | 1.05E-05 | PRKCI, HIP1, ANXA1, SGIP1, PLEKHA2, MYOF, AGAP1, SPTB, PLA2G7, ARHGAP44, MAP1B, PSD3, AMPH, VAMP2                                                                                                                                                                                                                                                                                                                                                                                                                                                                                                                                                                                                                                                                                                                                                                                                                                                                                                                                                                                                                                                                                                                                                                                                                                                                                                                                                                                                                                                              | 608        | 88       | 17446     | 4.564967    | 0.007492   | 0.00188   | 0.001833 |
| GO_BP    | GO:0007399~nervous system development                                                      | 32    | 4.41  | 1.32E-05 | SEMA5A, ROBO2, ZFP423, ZC4H2, SEMA3E, GDPD5, PPP1R9B, EFN1, DCDC2A, DPYSL2, ATOH8, SRGAP2, EPHB1, SEMA6C, NTNG2, SRRM4, NDE1, NTRK3, MAGI2, CABLES1, FOS, VEGFA, NR4A2, GDNF, MAP1B, KCTD11, MAFK, NES, NBL1, ARF6, BMPR1A, GAS7                                                                                                                                                                                                                                                                                                                                                                                                                                                                                                                                                                                                                                                                                                                                                                                                                                                                                                                                                                                                                                                                                                                                                                                                                                                                                                                               | 642        | 377      | 18082     | 2.390672    | 0.035007   | 0.005089  | 0.005042 |
| GO_BP    | GO:0001666~response to hypoxia                                                             | 21    | 2.90  | 1.67E-05 | PRMT2, SRF, ITGA2, IL18, PLOD2, PLAT, ADM, ACTN4, WTIP, AGER, CBFA2T3, VEGFA, FOSL2, LOXL2, DPP4, NR4A2, TGFBR3, PAK1, UCP2, AJUBA, CRYAB                                                                                                                                                                                                                                                                                                                                                                                                                                                                                                                                                                                                                                                                                                                                                                                                                                                                                                                                                                                                                                                                                                                                                                                                                                                                                                                                                                                                                      | 642        | 192      | 18082     | 3.080559    | 0.044242   | 0.005654  | 0.005602 |
| GO_BP    | GO:0030336~negative regulation of cell migration                                           | 15    | 2.07  | 2.24E-05 | KANK1, SRF, MAGI2, TPM1, SULF1, AGER, ABR, DACH1, RRAS, DLC1, DAG1, SRGAP2, SRGAP1, RECK, WNT4                                                                                                                                                                                                                                                                                                                                                                                                                                                                                                                                                                                                                                                                                                                                                                                                                                                                                                                                                                                                                                                                                                                                                                                                                                                                                                                                                                                                                                                                 | 642        | 106      | 18082     | 3.985629    | 0.058834   | 0.006735  | 0.006672 |
| GO_MF    | GO:0030165~PDZ domain binding                                                              | 15    | 2.07  | 5.06E-05 | NSF, MPP3, DOCK4, FZD2, DTNA, KCNJ12, PLEKHA2, MAGI2, ARHGEF16, CRIM1, SYNJ2, NKD1, SLC9A3R2, TGFBR3, APBA1                                                                                                                                                                                                                                                                                                                                                                                                                                                                                                                                                                                                                                                                                                                                                                                                                                                                                                                                                                                                                                                                                                                                                                                                                                                                                                                                                                                                                                                    | 608        | 116      | 17446     | 3.710441    | 0.035466   | 0.007222  | 0.00704  |
| KEGG     | mmu04810:Regulation of actin cytoskeleton                                                  | 21    | 2.90  | 5.15E-05 | ITGB1, ARHGEF12, GSN, ITGB5, ITGA3, ITGA2, ACTN1, F2R, RRAS2, ACTN4, IQGAP1, IQGAP2, MYL12A, MYLK3, MYLK, PAK1, MYL7, RRAS, TMSB4X, FGFR2, FGFR1                                                                                                                                                                                                                                                                                                                                                                                                                                                                                                                                                                                                                                                                                                                                                                                                                                                                                                                                                                                                                                                                                                                                                                                                                                                                                                                                                                                                               | 270        | 213      | 7691      | 2.808399    | 0.010345   | 0.005225  | 0.004736 |
| GO_BP    | GO:0007275~multicellular organism development                                              | 62    | 8.55  | 5.69E-05 | SEMA5A, ROBO2, COL18A1, ZFP521, WIPF3, TCF23, TNFAIP2, SCX, PPP1R9B, DACH1, DPYSL2, CREB3L1, QK, ZFP37, SEMA6C, PRKCI, PRM1, FOXD1, TNFRSF12A, SHROOM3, UNC5C, SHISA3, NPNT, DISP1, SMO, KCTD11, LMX1B, KCTD15, GAS7, FOXC2, ZFP423, CASZ1, PKDCC, NXN, ZC4H2, SRF, SEMA3E, NKD1, EFN1, ARVCF, FLRT2, WIF1, ATOH8, HIVEP1, HOXC5, HOXC4, FYN, HIVEP2, HOXC8, WNT4, HOXC6, NTNG2, FZD2, GADD45B, NDE1, NTRK3, EYA4, TDRD5, ARHGAP24, VEGFA, NPHS1, NES                                                                                                                                                                                                                                                                                                                                                                                                                                                                                                                                                                                                                                                                                                                                                                                                                                                                                                                                                                                                                                                                                                          | 642        | 1029     | 18082     | 1.697023    | 0.142715   | 0.01415   | 0.014019 |
| GO_BP    | GO:0001822~kidney development                                                              | 16    | 2.21  | 5.80E-05 | CDKN1C, ROBO2, FOXC2, FOXC1, FOXD1, TCF21, SULF1, VEGFA, MYO1E, WT1, ALDH1A2, MMP17, NEK1, LZTS2, TNS2, WNT4                                                                                                                                                                                                                                                                                                                                                                                                                                                                                                                                                                                                                                                                                                                                                                                                                                                                                                                                                                                                                                                                                                                                                                                                                                                                                                                                                                                                                                                   | 642        | 130      | 18082     | 3.466475    | 0.14526    | 0.01415   | 0.014019 |
| GO_BP    | GO:0007179~transforming growth factor beta receptor signaling pathway                      | 12    | 1.66  | 6.35E-05 | TGFBR3, ITGB1, CLDN5, JUN, COL1A2, ITGB5, GDNF, BAMBI, WFIKKN2, FOS, DUSP15, SMAD6                                                                                                                                                                                                                                                                                                                                                                                                                                                                                                                                                                                                                                                                                                                                                                                                                                                                                                                                                                                                                                                                                                                                                                                                                                                                                                                                                                                                                                                                             | 642        | 75       | 18082     | 4.506417    | 0.157875   | 0.01415   | 0.014019 |
| GO_BP    | GO:0090004~positive regulation of establishment of protein localization to plasma membrane | 8     | 1.10  | 6.80E-05 | ITGB1, PRKCI, ITGA3, KIF5B, ARHGEF16, ARF6, PPP1R9B, EPHA2                                                                                                                                                                                                                                                                                                                                                                                                                                                                                                                                                                                                                                                                                                                                                                                                                                                                                                                                                                                                                                                                                                                                                                                                                                                                                                                                                                                                                                                                                                     | 642        | 30       | 18082     | 7.510696    | 0.16808    | 0.01415   | 0.014019 |
| GO_BP    | GO:0007411~axon guidance                                                                   | 17    | 2.34  | 7.97E-05 | ROBO2, SEMA5A, SEMA6C, FOXD1, LAMB2, PTPRO, UNC5C, EFN1, ALCAM, NR4A3, FLRT2, DPYSL2, KIF5B, GAS1, NCAM1, FYN, EPHB1                                                                                                                                                                                                                                                                                                                                                                                                                                                                                                                                                                                                                                                                                                                                                                                                                                                                                                                                                                                                                                                                                                                                                                                                                                                                                                                                                                                                                                           | 642        | 149      | 18082     | 3.213469    | 0.194024   | 0.015401  | 0.015259 |
| GO_MF    | GO:0004714~transmembrane receptor protein tyrosine kinase activity                         | 10    | 1.38  | 9.24E-05 | EPHA6, PTK7, AXL, NTRK3, TYRO3, MERTK, EPHB1, FGFR2, FGFR1, EPHA2                                                                                                                                                                                                                                                                                                                                                                                                                                                                                                                                                                                                                                                                                                                                                                                                                                                                                                                                                                                                                                                                                                                                                                                                                                                                                                                                                                                                                                                                                              | 608        | 54       | 17446     | 5.313718    | 0.063824   | 0.010991  | 0.010714 |
| KEGG     | mmu04510:Focal adhesion                                                                    | 20    | 2.76  | 1.08E-04 | ITGB1, JUN, ITGB5, LAMB2, ITGA3, ITGA2, ACTN1, PARVA, ACTN4, MYL12A, MYLK3, VEGFA, MYLK, PAK1, MYL7, COL1A2, COL4A3, COL4A6, COL4A5, FYN                                                                                                                                                                                                                                                                                                                                                                                                                                                                                                                                                                                                                                                                                                                                                                                                                                                                                                                                                                                                                                                                                                                                                                                                                                                                                                                                                                                                                       | 270        | 207      | 7691      | 2.752192    | 0.021491   | 0.007277  | 0.006596 |
| GO_BP    | GO:0035914~skeletal muscle cell differentiation                                            | 10    | 1.38  | 1.24E-04 | NR4A1, BTG2, PLAGL1, ANKRD1, SCX, SMYD1, SOX8, NUPR1, FOS, ATF3                                                                                                                                                                                                                                                                                                                                                                                                                                                                                                                                                                                                                                                                                                                                                                                                                                                                                                                                                                                                                                                                                                                                                                                                                                                                                                                                                                                                                                                                                                | 642        | 55       | 18082     | 5.120929    | 0.284177   | 0.021124  | 0.020929 |
| GO_BP    | GO:0031175~neuron projection development                                                   | 16    | 2.21  | 1.25E-04 | ITGB1, LINGO1, BTG2, LAMB2, SRF, NGB, GDPD5, AGER, GNAO1, GDNF, PALLD, RAB13, NCAM1, MAP4, FRYL, FGFR1                                                                                                                                                                                                                                                                                                                                                                                                                                                                                                                                                                                                                                                                                                                                                                                                                                                                                                                                                                                                                                                                                                                                                                                                                                                                                                                                                                                                                                                         | 642        | 139      | 18082     | 3.242027    | 0.286897   | 0.021124  | 0.020929 |
| GO_BP    | GO:0032836~glomerular basement membrane development                                        | 5     | 0.69  | 1.71E-04 | MYO1E, NPHS1, WT1, COL4A3, SULF1                                                                                                                                                                                                                                                                                                                                                                                                                                                                                                                                                                                                                                                                                                                                                                                                                                                                                                                                                                                                                                                                                                                                                                                                                                                                                                                                                                                                                                                                                                                               | 642        | 9        | 18082     | 15.64728    | 0.370425   | 0.025694  | 0.025457 |
| GO_BP    | GO:0032835~glomerulus development                                                          | 5     | 0.69  | 1.71E-04 | ENPEP, WT1, PTPRO, TCF21, PLCE1                                                                                                                                                                                                                                                                                                                                                                                                                                                                                                                                                                                                                                                                                                                                                                                                                                                                                                                                                                                                                                                                                                                                                                                                                                                                                                                                                                                                                                                                                                                                | 642        | 9        | 18082     | 15.64728    | 0.370425   | 0.025694  | 0.025457 |

|       |                                                                                 |    |      |          |                                                                                                                                                                                                                                                                                                                                                                                               |     |     |       |          |          |          |          |
|-------|---------------------------------------------------------------------------------|----|------|----------|-----------------------------------------------------------------------------------------------------------------------------------------------------------------------------------------------------------------------------------------------------------------------------------------------------------------------------------------------------------------------------------------------|-----|-----|-------|----------|----------|----------|----------|
| GO_MF | GO:0005178~integrin binding                                                     | 13 | 1.79 | 1.82E-04 | ITGB1, CD151, ITGB5, LAMB2, ITGA3, ITGA2, ACTN1, EMP2, NPNT, CYR61, COL4A3, TIMP2, UTRN                                                                                                                                                                                                                                                                                                       | 608 | 100 | 17446 | 3.73023  | 0.121602 | 0.015298 | 0.014913 |
| GO_MF | GO:0015631~tubulin binding                                                      | 9  | 1.24 | 1.94E-04 | SGIP1, DAG1, FYN, MAPT, TPPP, MAP4, KLC1, EML1, EML2                                                                                                                                                                                                                                                                                                                                          | 608 | 47  | 17446 | 5.494611 | 0.129586 | 0.015298 | 0.014913 |
| GO_MF | GO:0017048~Rho GTPase binding                                                   | 8  | 1.10 | 2.07E-04 | DOCK11, FMNL2, INF2, DAAM2, ARHGEF16, IQGAP1, IQGAP2, SRGAP1                                                                                                                                                                                                                                                                                                                                  | 608 | 36  | 17446 | 6.376462 | 0.137134 | 0.015298 | 0.014913 |
| GO_BP | GO:0016525~negative regulation of angiogenesis                                  | 11 | 1.52 | 2.16E-04 | FOXC1, SPARC, CD59A, STAT1, PDE3B, COL4A3, LIF, SEMA3E, VASH1, SULF1, EPHA2                                                                                                                                                                                                                                                                                                                   | 642 | 72  | 18082 | 4.303003 | 0.442389 | 0.030727 | 0.030443 |
| GO_MF | GO:0043236~laminin binding                                                      | 7  | 0.97 | 2.20E-04 | ITGB1, BCAM, ITGA3, PLEKHA2, GPC1, ITGA2, DAG1                                                                                                                                                                                                                                                                                                                                                | 608 | 26  | 17446 | 7.725329 | 0.145194 | 0.015298 | 0.014913 |
| KEGG  | mmu04512:ECM-receptor interaction                                               | 12 | 1.66 | 2.29E-04 | ITGB1, COL1A2, ITGB5, SDC4, ITGA3, LAMB2, ITGA2, COL4A3, DAG1, COL4A6, COL4A5, NPNT                                                                                                                                                                                                                                                                                                           | 270 | 88  | 7691  | 3.884343 | 0.04514  | 0.011604 | 0.010517 |
| GO_MF | GO:0017124~SH3 domain binding                                                   | 14 | 1.93 | 2.36E-04 | DOCK4, CTTNBP2, SGIP1, WIPF3, SYNJ2, PTPN12, CD2AP, SH3BP5L, ELMO1, ELMO2, SH3BGRL2, SIRPA, QK, MAPT                                                                                                                                                                                                                                                                                          | 608 | 118 | 17446 | 3.404382 | 0.154902 | 0.015298 | 0.014913 |
| GO_BP | GO:0045944~positive regulation of transcription from RNA polymerase II promoter | 58 | 8.00 | 2.41E-04 | GLP1R, CRTC1, TCF21, SCX, ARRB1, CYR61, ABRA, CREB3L1, NCK2, SOX8, SOX5, CDON, TEAD4, FOXD1, IL18, ARID5A, FOS, ARMCX3, SMO, ELF4, RARB, LMX1B, MAML3, ATF3, FOXC2, FOXC1, RNASEL, SRF, NPAS2, DDN, MLLT6, ARNTL, RELB, ABLIM3, PLAGL1, E2F1, NDN, ZBTB7C, ZFP462, JUN, STAT1, LIF, PBX2, MAFA, VEGFA, FOSL2, NR4A2, NR4A1, MAFB, NR4A3, GDNF, WT1, FOSB, LPIN2, NFE2L1, FGFR2, BMPR1A, FGFR1 | 642 | 995 | 18082 | 1.641785 | 0.478967 | 0.032581 | 0.03228  |
| GO_BP | GO:0030154~cell differentiation                                                 | 48 | 6.62 | 2.82E-04 | SEMA5A, ROBO2, TDRKH, ZFP423, HIP1, PKDCC, TENM3, ZFP521, NXN, WIPF3, TCF23, TNFAIP2, SCX, ILDR2, SEMA3E, NKD1, PPP1R9B, EFN1, DPYSL2, ATOH8, SPEG, QK, THSD7A, ZFP37, WNT4, SEMA6C, NTNG2, SRRM4, PRM1, TNFRSF12A, GADD45B, NDE1, NTRK3, EYA4, NPNT, TDRD5, CBFA2T3, ARHGAP24, VEGFA, SYT17, ELF4, AXL, PMP22, KCTD11, ARF6, BMPR1A, EPHA2, GAS7                                             | 642 | 780 | 18082 | 1.733237 | 0.533762 | 0.036318 | 0.035982 |
| GO_BP | GO:0007264~small GTPase mediated signal transduction                            | 21 | 2.90 | 2.96E-04 | RAB3B, BCAR3, GM266, DOCK5, DOCK4, RASL11A, RRAS2, AGAP1, ARHGEF18, ARHGAP33, ARL4C, DOCK11, ARL4D, RAB30, RIT1, RRAS, RAB13, PLCE1, RAB7B, RAB6B, ARF6                                                                                                                                                                                                                                       | 642 | 236 | 18082 | 2.506217 | 0.551359 | 0.036414 | 0.036078 |
| GO_MF | GO:0098641~cadherin binding involved in cell-cell adhesion                      | 23 | 3.17 | 3.19E-04 | ITGB1, ANXA1, ANXA2, AHNAC, STAT1, TMOD3, ARHGEF16, PARVA, IQGAP1, VASN, CD2AP, FAM129B, SLC9A3R2, TJP1, FMNL2, EHD4, MPRIP, KIF5B, EFHD2, HIST2H3C2, MYH9, LRRFIP1, EPHA2                                                                                                                                                                                                                    | 608 | 279 | 17446 | 2.365462 | 0.203792 | 0.018988 | 0.018509 |
| GO_BP | GO:0001525~angiogenesis                                                         | 21 | 2.90 | 3.49E-04 | COL18A1, ENPEP, JUN, TNFRSF12A, ANXA2, PDE3B, TNFAIP2, IL18, TGFA, SEMA3E, PARVA, VASH1, ARHGAP24, VEGFA, CCDC80, MYH9, THSD7A, EPHB1, FGFR2, FGFR1, EPHA2                                                                                                                                                                                                                                    | 642 | 239 | 18082 | 2.474759 | 0.61141  | 0.041075 | 0.040695 |
| GO_MF | GO:0005085~guanyl-nucleotide exchange factor activity                           | 16 | 2.21 | 3.64E-04 | BCAR3, DOCK5, ARHGEF10, DOCK4, ARHGEF12, PLEKHG2, ARHGEF17, ARHGEF16, ARHGEF18, DOCK11, ABR, PSD3, ELMO1, PLCE1, DENND5A, ARFGEF3                                                                                                                                                                                                                                                             | 608 | 156 | 17446 | 2.942982 | 0.228691 | 0.01982  | 0.01932  |
| GO_BP | GO:0030199~collagen fibril organization                                         | 8  | 1.10 | 3.90E-04 | FOXC2, FOXC1, COL1A2, ANXA2, P3H1, SCX, LMX1B, LOXL2                                                                                                                                                                                                                                                                                                                                          | 642 | 39  | 18082 | 5.777458 | 0.65158  | 0.042955 | 0.042558 |
| GO_BP | GO:0043065~positive regulation of apoptotic process                             | 26 | 3.59 | 3.97E-04 | ITGB1, MTCH1, STEAP3, ADM, AGER, UACA, CYR61, RASSF2, ADAMTSL4, ANKRD1, UNC13B, JUN, ANXA1, TNFRSF12A, GADD45B, PRMT2, GADD45A, NTRK3, IL18, UNC5C, NR4A1, LATS2, WT1, ALDH1A2, RARB, NUPR1                                                                                                                                                                                                   | 642 | 335 | 18082 | 2.185949 | 0.658529 | 0.042955 | 0.042558 |
| GO_MF | GO:0005509~calcium ion binding                                                  | 43 | 5.93 | 4.14E-04 | CRB2, NECAB3, SPARC, PROS1, HPCA, ITPR3, MYL12A, NKD1, MAN1A2, EFHD2, DAG1, S100A13, SVEP1, RHBDL3, PAMR1, S100A11, C1RA, GSN, ANXA1, ANXA2, ANXA3, ACTN1, ACTN4, NPNT, SULF1, SYT9, MCC, DLK2, AIF1L, SYT17, NELL2, EHD2, MYL6, MYL7, EHD4, MMP17, MYL3, FAT1, FKBP7, MICU1, ASTN2, MEGF8, CALM2                                                                                             | 608 | 699 | 17446 | 1.765158 | 0.255728 | 0.01982  | 0.01932  |
| GO_MF | GO:0043565~sequence-specific DNA binding                                        | 40 | 5.52 | 4.16E-04 | FOXC2, FOXC1, ZFP423, SRF, SCX, ARNTL, FOXS1, ZFP13, GBX1, CREB3L1, HOXC5, E2F1, HOXC4, SOX8, HIVEP2, HOXC8, HOXC6, PKNOX2, TEAD4, FOXD2, JUN, FOXD1, STAT1, PBX2, FOS, FOXL1, MAFA, FOSL2, NR4A2, NR4A1, NR4A3, MAFB, WT1, ELF4, FOSB, RARB, MAFK, LMX1B, ATF3, NFE2L1                                                                                                                       | 608 | 633 | 17446 | 1.813212 | 0.257222 | 0.01982  | 0.01932  |
| GO_MF | GO:0008373~sialyltransferase activity                                           | 6  | 0.83 | 5.03E-04 | ST6GAL1, ST3GAL6, ST6GALNAC3, ST3GAL1, ST6GALNAC6, ST3GAL3                                                                                                                                                                                                                                                                                                                                    | 608 | 20  | 17446 | 8.608224 | 0.302018 | 0.022467 | 0.021901 |
| KEGG  | mmu04024:cAMP signaling pathway                                                 | 18 | 2.48 | 5.13E-04 | GLP1R, JUN, NPR1, F2R, PDE3B, RRAS2, FOS, ADCY1, ATP1B2, PLD1, ADCY5, PAK1, RRAS, CREB3L1, PDE4B, PDE3A, PLCE1, CALM2                                                                                                                                                                                                                                                                         | 270 | 197 | 7691  | 2.602707 | 0.098487 | 0.020834 | 0.018884 |
| GO_BP | GO:0043524~negative regulation of neuron apoptotic process                      | 16 | 2.21 | 5.80E-04 | GLP1R, BTG2, PRKCI, JUN, STXB1P1, F2R, GDF5, VEGFA, NR4A2, NR4A3, GDNF, AXL, TYRO3, FYN, NES, OPTN                                                                                                                                                                                                                                                                                            | 642 | 160 | 18082 | 2.816511 | 0.791742 | 0.060305 | 0.059748 |
| KEGG  | mmu04611:Platelet activation                                                    | 14 | 1.93 | 6.37E-04 | ITGB1, PRKCI, ARHGEF12, ITGA2, F2R, ITPR3, ADCY1, MYL12A, MYLK3, ADCY5, MYLK, COL1A2, FYN, PRKG1                                                                                                                                                                                                                                                                                              | 270 | 131 | 7691  | 3.044218 | 0.120704 | 0.02092  | 0.018962 |
| GO_BP | GO:0007015~actin filament organization                                          | 11 | 1.52 | 6.91E-04 | PRKCI, SRF, TMSB4X, TMOD3, ACTN1, NCK2, FAT1, SIRPA, EMP2, TMSB10, PPP1R9B                                                                                                                                                                                                                                                                                                                    | 642 | 83  | 18082 | 3.732725 | 0.845998 | 0.069239 | 0.068599 |
| KEGG  | mmu05205:Proteoglycans in cancer                                                | 18 | 2.48 | 7.21E-04 | ITGB1, ARHGEF12, FZD2, ITGB5, SDC4, ITGA2, RRAS2, ITPR3, IQGAP1, VEGFA, PAK1, COL1A2, RRAS, SMO, GPC1, PLCE1, FGFR1, WNT4                                                                                                                                                                                                                                                                     | 270 | 203 | 7691  | 2.52578  | 0.135646 | 0.02092  | 0.018962 |
| GO_BP | GO:0051271~negative regulation of cellular component movement                   | 4  | 0.55 | 8.18E-04 | TGFBR3, TMOD3, ACTN1, ACTN4                                                                                                                                                                                                                                                                                                                                                                   | 642 | 6   | 18082 | 18.77674 | 0.890929 | 0.079072 | 0.078342 |
| GO_BP | GO:0019933~cAMP-mediated signaling                                              | 7  | 0.97 | 9.48E-04 | GLP1R, KSR1, NPR3, PDE3A, ADM, ADCY1, ADCY5                                                                                                                                                                                                                                                                                                                                                   | 642 | 33  | 18082 | 5.974417 | 0.923144 | 0.088402 | 0.087585 |
| GO_MF | GO:0005518~collagen binding                                                     | 9  | 1.24 | 9.51E-04 | DPP4, ITGB1, MRC2, PAK1, SPARC, C1QTNF1, ITGA3, ITGA2, MAP1A                                                                                                                                                                                                                                                                                                                                  | 608 | 59  | 17446 | 4.377063 | 0.493025 | 0.039939 | 0.038933 |
| GO_MF | GO:0005089~Rho guanyl-nucleotide exchange factor activity                       | 10 | 1.38 | 0.001037 | DOCK11, ARHGEF10, ABR, PLEKHG1, ARHGEF12, PLEKHG2, ARHGEF26, ARHGEF17, ARHGEF16, ARHGEF18                                                                                                                                                                                                                                                                                                     | 608 | 74  | 17446 | 3.877578 | 0.523199 | 0.041126 | 0.040089 |
| GO_BP | GO:0045666~positive regulation of neuron differentiation                        | 12 | 1.66 | 0.001058 | SOCS2, ITGB1, MAP1B, TIMP2, RARB, BNIP2, KCTD11, GDPD5, GDF5, NBL1, CDON, FGFR1                                                                                                                                                                                                                                                                                                               | 642 | 103 | 18082 | 3.281372 | 0.943049 | 0.095433 | 0.094551 |
| KEGG  | mmu04530:Tight junction                                                         | 11 | 1.52 | 0.001123 | TJP1, CLDN5, PRKCI, PARD6B, ACTN1, RAB13, MYH9, ACTN4, MPP5, MYL12A, TJAP1                                                                                                                                                                                                                                                                                                                    | 270 | 90  | 7691  | 3.481523 | 0.203056 | 0.028496 | 0.025829 |
| KEGG  | mmu05032:Morphine addiction                                                     | 11 | 1.52 | 0.001447 | GNAO1, GABRB1, PDE10A, GRK5, GABRA4, PDE3B, PDE4B, PDE3A, ARRB1, ADCY1, ADCY5                                                                                                                                                                                                                                                                                                                 | 270 | 93  | 7691  | 3.369215 | 0.253591 | 0.032635 | 0.029581 |
| GO_MF | GO:0005200~structural constituent of cytoskeleton                               | 10 | 1.38 | 0.001513 | EPB41L5, TUBB2B, TUBB2A, FRMD6, TUBA1A, TPM1, VIM, SPTB, MYOM2, LOR                                                                                                                                                                                                                                                                                                                           | 608 | 78  | 17446 | 3.678728 | 0.660849 | 0.056868 | 0.055434 |
| GO_BP | GO:0001764~neuron migration                                                     | 13 | 1.79 | 0.00152  | ITGA3, NDE1, NTRK3, SRF, NR4A2, TUBB2B, DCDC2A, AXL, NDN, FYN, MAPT, LMX1B, PRKG1                                                                                                                                                                                                                                                                                                             | 642 | 124 | 18082 | 2.952794 | 0.983689 | 0.123838 | 0.122693 |
| GO_BP | GO:0030513~positive regulation of BMP signaling pathway                         | 7  | 0.97 | 0.001523 | TGFBR3, CRB2, ZFP423, FOXD1, SULF1, GDF5, CYR61                                                                                                                                                                                                                                                                                                                                               | 642 | 36  | 18082 | 5.476549 | 0.983837 | 0.123838 | 0.122693 |
| GO_BP | GO:0016337~single organismal cell-cell adhesion                                 | 12 | 1.66 | 0.001562 | CLDN5, ARVCF, KIRREL, KIRREL2, CCDC80, SRF, FAT1, MYH9, NECTIN4, CYR61, CDON, CD2AP                                                                                                                                                                                                                                                                                                           | 642 | 108 | 18082 | 3.129457 | 0.985449 | 0.123838 | 0.122693 |
| GO_BP | GO:0035023~regulation of Rho protein signal transduction                        | 10 | 1.38 | 0.001572 | ARHGEF10, ABR, PLEKHG1, ARHGEF12, PLEKHG2, ARHGEF26, DLC1, ARHGEF17, ARHGEF16, ARHGEF18                                                                                                                                                                                                                                                                                                       | 642 | 77  | 18082 | 3.657806 | 0.985832 | 0.123838 | 0.122693 |
| GO_BP | GO:0001755~neural crest cell migration                                          | 8  | 1.10 | 0.001602 | SEMA5A, SEMA6C, EFN1, SMO, GDNF, SEMA3G, SOX8, SEMA3E                                                                                                                                                                                                                                                                                                                                         | 642 | 49  | 18082 | 4.598385 | 0.986956 | 0.123838 | 0.122693 |
| GO_BP | GO:0002053~positive regulation of mesenchymal cell proliferation                | 7  | 0.97 | 0.001764 | SMO, STAT1, GAS1, FGFR2, VEGFA, FGFR1, BMPR1A                                                                                                                                                                                                                                                                                                                                                 | 642 | 37  | 18082 | 5.328534 | 0.991593 | 0.132576 | 0.13135  |
| GO_MF | GO:0017134~fibroblast growth factor binding                                     | 6  | 0.83 | 0.001798 | TGFBR3, FGFBP1, GPC1, S100A13, FGFR2, FGFR1                                                                                                                                                                                                                                                                                                                                                   | 608 | 26  | 17446 | 6.621711 | 0.723257 | 0.064176 | 0.062558 |
| GO_BP | GO:0008284~positive regulation of cell proliferation                            | 34 | 4.69 | 0.001876 | PTGER4, ITGB1, GLP1R, COL18A1, SCX, TGFA, IL6RA, ADM, DPP4, PAK1, GRK5, S100A13, TNS3, JUN, FGFBP1, STAT1, NTRK3, IL34, F2R, LIF, EMP2, GAB2, VEGFA, TGFBR3, SMO, GDNF, BAMBI, ALDH1A2, RARB, GAS1, ATF3, OPTN, FGFR2, FGFR1                                                                                                                                                                  | 642 | 542 | 18082 | 1.766815 | 0.993786 | 0.135411 | 0.134159 |

|       |                                                                                                                          |    |      |          |                                                                                                                                                                                                                 |     |     |       |          |          |          |          |
|-------|--------------------------------------------------------------------------------------------------------------------------|----|------|----------|-----------------------------------------------------------------------------------------------------------------------------------------------------------------------------------------------------------------|-----|-----|-------|----------|----------|----------|----------|
| GO_BP | GO:0048675~axon extension                                                                                                | 6  | 0.83 | 0.001952 | SEMA5A, ITGB1, MAP1B, NDN, PLXNB1, MAPT                                                                                                                                                                         | 642 | 26  | 18082 | 6.499641 | 0.994949 | 0.135411 | 0.134159 |
| GO_BP | GO:0032967~positive regulation of collagen biosynthetic process                                                          | 6  | 0.83 | 0.001952 | CREB3L1, ITGA2, F2R, IL18, SCX, WNT4                                                                                                                                                                            | 642 | 26  | 18082 | 6.499641 | 0.994949 | 0.135411 | 0.134159 |
| GO_BP | GO:0007528~neuromuscular junction development                                                                            | 7  | 0.97 | 0.002033 | UNC13B, PAK1, LAMB2, ZC4H2, COL4A5, UTRN, FGFR2                                                                                                                                                                 | 642 | 38  | 18082 | 5.18831  | 0.995946 | 0.135749 | 0.134495 |
| GO_BP | GO:0048661~positive regulation of smooth muscle cell proliferation                                                       | 10 | 1.38 | 0.002058 | JUN, NR4A3, STAT1, ITGA2, IL18, IL6RA, SULF1, AGER, FGFR2, VEGFA                                                                                                                                                | 642 | 80  | 18082 | 3.520639 | 0.996203 | 0.135749 | 0.134495 |
| GO_BP | GO:0034097~response to cytokine                                                                                          | 10 | 1.38 | 0.002244 | GNAO1, JUN, SPARC, STAT1, ALDH1A2, SRF, TIMP2, IL6RA, FOS, RELB                                                                                                                                                 | 642 | 81  | 18082 | 3.477174 | 0.997708 | 0.143274 | 0.14195  |
| GO_BP | GO:0006909~phagocytosis                                                                                                  | 8  | 1.10 | 0.002278 | ANXA1, ANXA3, AXL, ELMO1, ELMO2, MERTK, GULP1, CDC42SE2                                                                                                                                                         | 642 | 52  | 18082 | 4.333094 | 0.997909 | 0.143274 | 0.14195  |
| GO_BP | GO:0030335~positive regulation of cell migration                                                                         | 17 | 2.34 | 0.002437 | ITGB1, SEMA6C, COL18A1, NTRK3, F2R, SEMA3G, RRAS2, SEMA3E, ACTN4, PLD1, AGER, CYR61, VEGFA, MYLK, PAK1, PODXL, MYADM                                                                                            | 642 | 203 | 18082 | 2.358654 | 0.998643 | 0.149812 | 0.148427 |
| GO_BP | GO:0055010~ventricular cardiac muscle tissue morphogenesis                                                               | 6  | 0.83 | 0.002751 | TGFBR3, FOXC2, FOXC1, TPM1, MYL3, FGFR2                                                                                                                                                                         | 642 | 28  | 18082 | 6.035381 | 0.999422 | 0.165395 | 0.163866 |
| GO_MF | GO:0001968~fibronectin binding                                                                                           | 6  | 0.83 | 0.002978 | ITGB1, CCDC80, SDC4, ITGA3, PLEKHA2, VEGFA                                                                                                                                                                      | 608 | 29  | 17446 | 5.936706 | 0.881119 | 0.10126  | 0.098707 |
| GO_BP | GO:0009311~oligosaccharide metabolic process                                                                             | 5  | 0.69 | 0.003219 | ST6GAL1, ST3GAL6, ST6GALNAC3, ST3GAL1, ST3GAL3                                                                                                                                                                  | 642 | 18  | 18082 | 7.823641 | 0.999838 | 0.181418 | 0.179741 |
| GO_BP | GO:0021954~central nervous system neuron development                                                                     | 5  | 0.69 | 0.003219 | LINGO1, GABRB1, BTG2, LMX1B, FGFR1                                                                                                                                                                              | 642 | 18  | 18082 | 7.823641 | 0.999838 | 0.181418 | 0.179741 |
| GO_BP | GO:0001574~ganglioside biosynthetic process                                                                              | 5  | 0.69 | 0.003219 | ST3GAL6, ST6GALNAC3, ST3GAL1, ST6GALNAC6, ST3GAL3                                                                                                                                                               | 642 | 18  | 18082 | 7.823641 | 0.999838 | 0.181418 | 0.179741 |
| KEGG  | mmu04015:Rap1 signaling pathway                                                                                          | 17 | 2.34 | 0.003308 | ITGB1, PRKCI, DOCK4, MAGI2, F2R, ADCY1, SIPA1L2, ADCY5, VEGFA, GNAO1, PARD6B, RRAS, PLCE1, CALM2, FGFR2, FGFR1, EPHA2                                                                                           | 270 | 214 | 7691  | 2.262842 | 0.487905 | 0.067144 | 0.06086  |
| GO_MF | GO:0004713~protein tyrosine kinase activity                                                                              | 12 | 1.66 | 0.003323 | EPHA6, PKDCC, AXL, NTRK3, TYRO3, NEK1, FYN, MERTK, EPHB1, FGFR2, FGFR1, EPHA2                                                                                                                                   | 608 | 121 | 17446 | 2.845694 | 0.90714  | 0.10785  | 0.105131 |
| GO_BP | GO:0030900~forebrain development                                                                                         | 10 | 1.38 | 0.003385 | GNAO1, CNP, DLC1, NDE1, ALDH1A2, SRF, APLP1, E2F1, FYN, PRKG1                                                                                                                                                   | 642 | 86  | 18082 | 3.275013 | 0.999896 | 0.186844 | 0.185117 |
| GO_BP | GO:0051250~negative regulation of lymphocyte activation                                                                  | 3  | 0.41 | 0.003676 | AXL, TYRO3, MERTK                                                                                                                                                                                               | 642 | 3   | 18082 | 28.16511 | 0.999953 | 0.192097 | 0.190322 |
| GO_BP | GO:0032387~negative regulation of intracellular transport                                                                | 3  | 0.41 | 0.003676 | MAP1B, MAPT, CRYAB                                                                                                                                                                                              | 642 | 3   | 18082 | 28.16511 | 0.999953 | 0.192097 | 0.190322 |
| GO_BP | GO:0010976~positive regulation of neuron projection development                                                          | 13 | 1.79 | 0.003721 | ITGB1, PRKCI, TENM3, ITGA3, MAGI2, LIF, PTK7, MOB2, ANKRD1, QK, FYN, KIF3C, FGFR1                                                                                                                               | 642 | 138 | 18082 | 2.653235 | 0.999958 | 0.192097 | 0.190322 |
| GO_BP | GO:0001937~negative regulation of endothelial cell proliferation                                                         | 6  | 0.83 | 0.003764 | SPARC, STAT1, ATOH8, VASH1, SULF1, AGER                                                                                                                                                                         | 642 | 30  | 18082 | 5.633022 | 0.999963 | 0.192097 | 0.190322 |
| GO_MF | GO:0046982~protein heterodimerization activity                                                                           | 31 | 4.28 | 0.004109 | ITGB1, SPTBN5, ZFP423, HIP1, TENM3, H2-Q6, H2-Q7, BHLHE41, H2-Q4, SCX, ADCY5, ARNTL, SOX8, PDZD7, SOX5, JUN, FZD2, ITGA3, ITGA2, INHBB, FOS, SPTB, VEGFA, DLK2, NR4A2, NR4A1, AXL, TYRO3, AMPH, MICU1, ATF3     | 608 | 514 | 17446 | 1.730577 | 0.947136 | 0.127565 | 0.124349 |
| GO_BP | GO:0018279~protein N-linked glycosylation via asparagine                                                                 | 6  | 0.83 | 0.004359 | ST6GAL1, ST3GAL6, ST6GALNAC3, ST3GAL1, ST6GALNAC6, ST3GAL3                                                                                                                                                      | 642 | 31  | 18082 | 5.451311 | 0.999993 | 0.21327  | 0.211299 |
| GO_BP | GO:0070372~regulation of ERK1 and ERK2 cascade                                                                           | 6  | 0.83 | 0.004359 | TGFBR3, RRAS, EPHB1, CYR61, FGFR2, EPHA2                                                                                                                                                                        | 642 | 31  | 18082 | 5.451311 | 0.999993 | 0.21327  | 0.211299 |
| GO_BP | GO:0032963~collagen metabolic process                                                                                    | 4  | 0.55 | 0.004415 | TGFBR3, P3H2, P3H1, TNS2                                                                                                                                                                                        | 642 | 10  | 18082 | 11.26604 | 0.999994 | 0.21327  | 0.211299 |
| GO_BP | GO:0016311~dephosphorylation                                                                                             | 11 | 1.52 | 0.005348 | DUSP10, DUSP3, PTPRO, PTPN21, PTPN12, SYNJ2, DUSP15, DUSP8, ACPP, PTPN14, CDC14A                                                                                                                                | 642 | 109 | 18082 | 2.84235  | 1        | 0.253784 | 0.251439 |
| GO_BP | GO:0051894~positive regulation of focal adhesion assembly                                                                | 5  | 0.69 | 0.005788 | EPB41L5, SDC4, IQGAP1, WNT4, VEGFA                                                                                                                                                                              | 642 | 21  | 18082 | 6.705978 | 1        | 0.257945 | 0.255561 |
| GO_BP | GO:0032060~bleb assembly                                                                                                 | 4  | 0.55 | 0.005912 | PMP22, EMP2, EMP3, MYLK                                                                                                                                                                                         | 642 | 11  | 18082 | 10.24186 | 1        | 0.257945 | 0.255561 |
| GO_BP | GO:0009100~glycoprotein metabolic process                                                                                | 4  | 0.55 | 0.005912 | MAN1A2, PCSK6, ST6GALNAC3, ST6GALNAC6                                                                                                                                                                           | 642 | 11  | 18082 | 10.24186 | 1        | 0.257945 | 0.255561 |
| GO_BP | GO:0048333~mesodermal cell differentiation                                                                               | 4  | 0.55 | 0.005912 | ITGB1, ITGA3, ITGA2, FGFR2                                                                                                                                                                                      | 642 | 11  | 18082 | 10.24186 | 1        | 0.257945 | 0.255561 |
| GO_BP | GO:0032940~secretion by cell                                                                                             | 4  | 0.55 | 0.005912 | AXL, TYRO3, PCSK6, MERTK                                                                                                                                                                                        | 642 | 11  | 18082 | 10.24186 | 1        | 0.257945 | 0.255561 |
| GO_BP | GO:0032870~cellular response to hormone stimulus                                                                         | 7  | 0.97 | 0.006047 | ROBO2, SOCS2, JUN, NCF2, IGF2BP2, FOSB, FOS                                                                                                                                                                     | 642 | 47  | 18082 | 4.194803 | 1        | 0.259643 | 0.257243 |
| GO_MF | GO:0019904~protein domain specific binding                                                                               | 20 | 2.76 | 0.006156 | ITGB1, PRKCI, GSN, ZFP521, ITGA3, NDE1, ACTN1, STXBP1, IQGAP1, GAB2, MPP5, TJP1, MYO1D, EHD2, EPB41L5, TUBA1A, NPHS1, MYH9, MAPT, CALM2                                                                         | 608 | 289 | 17446 | 1.985749 | 0.987831 | 0.159949 | 0.155916 |
| GO_MF | GO:0004672~protein kinase activity                                                                                       | 31 | 4.28 | 0.006502 | RNASEL, PKDCC, MAST4, NPR1, MYLK3, MYLK, PPP1R9B, PAK1, RASSF2, GRK5, SPEG, NEK1, FYN, EPHB1, PRKG1, PRKCI, EPHA6, KSR1, MLKL, NTRK3, MERTK, LATS2, PTK7, AXL, STK26, TYRO3, TRIB2, FGFR2, BMPR1A, EPHA2, FGFR1 | 608 | 531 | 17446 | 1.675172 | 0.990513 | 0.159949 | 0.155916 |
| KEGG  | mmu04390:Hippo signaling pathway                                                                                         | 13 | 1.79 | 0.006523 | TEAD4, CRB2, PRKCI, FZD2, WTIP, MPP5, GDF5, PARD6B, FRMD6, LATS2, AJUBA, BMPR1A, WNT4                                                                                                                           | 270 | 151 | 7691  | 2.452367 | 0.733369 | 0.115427 | 0.104624 |
| GO_MF | GO:0008022~protein C-terminus binding                                                                                    | 16 | 2.21 | 0.006541 | NSF, SPTBN5, KSR1, NCF2, EML2, PPP1R9B, CD2AP, SLC9A3R2, TJP1, BCAM, AMPH, VIM, OPTN, VAMP2, SASH1, VGLL3                                                                                                       | 608 | 209 | 17446 | 2.196676 | 0.990773 | 0.159949 | 0.155916 |
| GO_MF | GO:0008201~heparin binding                                                                                               | 13 | 1.79 | 0.006567 | APLP1, PCSK6, AGER, CYR61, VEGFA, NELL2, TGFBR3, CCDC80, ADAMTSL5, NCAM1, RSPO1, FGFR2, FGFR1                                                                                                                   | 608 | 151 | 17446 | 2.470351 | 0.990943 | 0.159949 | 0.155916 |
| GO_MF | GO:0001077~transcriptional activator activity, RNA polymerase II core promoter proximal region sequence-specific binding | 19 | 2.62 | 0.006567 | TEAD4, FOXC2, JUN, FOXD1, SRF, TCF21, FOS, MAFA, RELB, ARNTL, NR4A2, NR4A1, NR4A3, MAFB, ELF4, WT1, CREB3L1, NDN, FOSB                                                                                          | 608 | 270 | 17446 | 2.019213 | 0.990945 | 0.159949 | 0.155916 |

|       |                                                                                           |    |      |          |                                                                                                                                                                                                                                                                                                             |     |     |       |          |          |          |          |
|-------|-------------------------------------------------------------------------------------------|----|------|----------|-------------------------------------------------------------------------------------------------------------------------------------------------------------------------------------------------------------------------------------------------------------------------------------------------------------|-----|-----|-------|----------|----------|----------|----------|
| GO_MF | GO:0004725~protein tyrosine phosphatase activity                                          | 10 | 1.38 | 0.006643 | DUSP10, DUSP3, EYA4, PTPRO, PTPN21, PTPN12, DUSP15, DUSP8, PTPN14, CDC14A                                                                                                                                                                                                                                   | 608 | 97  | 17446 | 2.958152 | 0.991424 | 0.159949 | 0.155916 |
| GO_BP | GO:0048286~lung alveolus development                                                      | 7  | 0.97 | 0.006709 | PKDCC, MAN1A2, LIF, TCF21, TNS3, FGFR2, VEGFA                                                                                                                                                                                                                                                               | 642 | 48  | 18082 | 4.107412 | 1        | 0.273643 | 0.271114 |
| GO_BP | GO:0045444~fat cell differentiation                                                       | 9  | 1.24 | 0.006822 | NR4A2, NR4A1, RNASEL, NR4A3, GRK5, INHBB, SOX8, SMAD6, METRNL                                                                                                                                                                                                                                               | 642 | 79  | 18082 | 3.208683 | 1        | 0.273643 | 0.271114 |
| KEGG  | mmu04145:Phagosome                                                                        | 14 | 1.93 | 0.006823 | COLEC12, ITGB1, C1RA, ITGB5, NCF2, ITGA2, H2-Q6, H2-Q7, MRC2, TUBB2B, TUBB2A, TUBA1A, RAB7B, DYNC111                                                                                                                                                                                                        | 270 | 171 | 7691  | 2.33212  | 0.749182 | 0.115427 | 0.104624 |
| GO_BP | GO:0032332~positive regulation of chondrocyte differentiation                             | 5  | 0.69 | 0.006879 | PKDCC, MUSTN1, GDF5, LOXL2, SOX5                                                                                                                                                                                                                                                                            | 642 | 22  | 18082 | 6.401161 | 1        | 0.273643 | 0.271114 |
| GO_BP | GO:1902895~positive regulation of pri-miRNA transcription from RNA polymerase II promoter | 5  | 0.69 | 0.006879 | JUN, SRF, FOS, SMAD6, BMPR1A                                                                                                                                                                                                                                                                                | 642 | 22  | 18082 | 6.401161 | 1        | 0.273643 | 0.271114 |
| GO_BP | GO:0035329~hippo signaling                                                                | 5  | 0.69 | 0.006879 | TEAD4, LATS2, AMOTL2, WTIP, AJUBA                                                                                                                                                                                                                                                                           | 642 | 22  | 18082 | 6.401161 | 1        | 0.273643 | 0.271114 |
| GO_MF | GO:0019834~phospholipase A2 inhibitor activity                                            | 3  | 0.41 | 0.006921 | ANXA1, ANXA2, ANXA3                                                                                                                                                                                                                                                                                         | 608 | 4   | 17446 | 21.52056 | 0.992977 | 0.159949 | 0.155916 |
| GO_BP | GO:1901491~negative regulation of lymphangiogenesis                                       | 3  | 0.41 | 0.007179 | FOXC1, VASH1, EPHA2                                                                                                                                                                                                                                                                                         | 642 | 4   | 18082 | 21.12383 | 1        | 0.277402 | 0.274839 |
| GO_BP | GO:0071376~cellular response to corticotropin-releasing hormone stimulus                  | 3  | 0.41 | 0.007179 | NR4A2, NR4A1, NR4A3                                                                                                                                                                                                                                                                                         | 642 | 4   | 18082 | 21.12383 | 1        | 0.277402 | 0.274839 |
| GO_MF | GO:0044548~S100 protein binding                                                           | 4  | 0.55 | 0.00729  | ANXA2, AHNAK, IQGAP1, AGER                                                                                                                                                                                                                                                                                  | 608 | 12  | 17446 | 9.564693 | 0.994614 | 0.159949 | 0.155916 |
| GO_MF | GO:0017166~vinculin binding                                                               | 4  | 0.55 | 0.00729  | DLC1, ACTN1, DAG1, UTRN                                                                                                                                                                                                                                                                                     | 608 | 12  | 17446 | 9.564693 | 0.994614 | 0.159949 | 0.155916 |
| GO_BP | GO:0003007~heart morphogenesis                                                            | 8  | 1.10 | 0.00735  | FOXC2, FOXC1, FLRT2, SMO, DLC1, ALDH1A2, VEGFA, BMPR1A                                                                                                                                                                                                                                                      | 642 | 64  | 18082 | 3.520639 | 1        | 0.278599 | 0.276024 |
| GO_MF | GO:0032403~protein complex binding                                                        | 23 | 3.17 | 0.007393 | NSF, ITGB1, MLKL, ITGA2, PROS1, MAGI2, ACTN4, IQGAP1, PPP1R9B, CD2AP, GNAO1, MYO1E, RRAS, MAP1B, NCK2, RARB, APBA1, AMPH, FYN, MAPT, EPHB1, VAMP2, FGFR1                                                                                                                                                    | 608 | 358 | 17446 | 1.843474 | 0.994998 | 0.159949 | 0.155916 |
| GO_BP | GO:0048589~developmental growth                                                           | 6  | 0.83 | 0.007416 | SMO, SRF, GAS1, IL6RA, ADM, BMPR1A                                                                                                                                                                                                                                                                          | 642 | 35  | 18082 | 4.828304 | 1        | 0.278599 | 0.276024 |
| GO_BP | GO:0098609~cell-cell adhesion                                                             | 15 | 2.07 | 0.00757  | STAT1, ARHGEF16, PARVA, VASN, FAM129B, SLC9A3R2, TJP1, TMEM47, FMNL2, EHD4, MPRIP, EFHD2, ELMO2, HIST2H3C2, LRRFIP1                                                                                                                                                                                         | 642 | 189 | 18082 | 2.235326 | 1        | 0.280492 | 0.2779   |
| GO_BP | GO:1904754~positive regulation of vascular associated smooth muscle cell migration        | 4  | 0.55 | 0.007677 | DOCK5, DOCK4, PAK1, IQGAP1                                                                                                                                                                                                                                                                                  | 642 | 12  | 18082 | 9.38837  | 1        | 0.280639 | 0.278045 |
| KEGG  | mmu05146:Amoebiasis                                                                       | 11 | 1.52 | 0.007686 | COL1A2, SERPINB6A, SERPINB6B, LAMB2, ACTN1, COL4A3, COL4A6, COL4A5, ACTN4, ADCY1, RAB7B                                                                                                                                                                                                                     | 270 | 117 | 7691  | 2.678094 | 0.789548 | 0.119436 | 0.108257 |
| GO_BP | GO:0060045~positive regulation of cardiac muscle cell proliferation                       | 5  | 0.69 | 0.008098 | TGFBR3, NCAM1, FGFR2, FGFR1, BMPR1A                                                                                                                                                                                                                                                                         | 642 | 23  | 18082 | 6.12285  | 1        | 0.292057 | 0.289357 |
| GO_MF | GO:0005525~GTP binding                                                                    | 24 | 3.31 | 0.008101 | RAB3B, GM266, NPR1, RASL11A, IRGM2, RRAS2, AGAP1, ARL4C, GNAO1, EHD2, ARL4D, TUBB2B, RAB30, RIT1, TUBB2A, TUBA1A, EHD4, RRAS, RRAGB, RAB13, UPRT, RAB7B, RAB6B, ARF6                                                                                                                                        | 608 | 383 | 17446 | 1.798062 | 0.996996 | 0.170125 | 0.165836 |
| KEGG  | mmu05414:Dilated cardiomyopathy                                                           | 9  | 1.24 | 0.008237 | ITGB1, ITGB5, ITGA3, ITGA2, TPM1, MYL3, DAG1, ADCY1, ADCY5                                                                                                                                                                                                                                                  | 270 | 83  | 7691  | 3.088755 | 0.811895 | 0.119436 | 0.108257 |
| GO_BP | GO:0010634~positive regulation of epithelial cell migration                               | 6  | 0.83 | 0.008366 | EPB41L5, DOCK5, JUN, ITGA3, ITGA2, GAB2                                                                                                                                                                                                                                                                     | 642 | 36  | 18082 | 4.694185 | 1        | 0.297761 | 0.29501  |
| GO_MF | GO:0008134~transcription factor binding                                                   | 22 | 3.03 | 0.008757 | FOXC1, JUN, RFXO2, SRF, NAB1, NAB2, ARID5A, PBX2, ARRB1, FOS, MED12L, ARNTL, NR4A1, MAFB, MDFIC, CSDC2, ATOH8, E2F1, ANKRD1, CRY1, SOX8, TRIB2                                                                                                                                                              | 608 | 342 | 17446 | 1.845818 | 0.998127 | 0.17569  | 0.171261 |
| GO_BP | GO:0035556~intracellular signal transduction                                              | 25 | 3.45 | 0.008766 | MAST4, NPR1, NOD1, ADCY1, ASB15, ADCY5, SOCS2, ABR, DCDC2A, PLCE1, TNS3, PAG1, TNS2, PEA15A, UNC13B, PRKCI, ARHGEF12, KSR1, WSB2, GAB2, TGFBR3, DOK1, SH3BP5L, LATS2, MYZAP                                                                                                                                 | 642 | 400 | 18082 | 1.760319 | 1        | 0.307944 | 0.305098 |
| KEGG  | mmu05222:Small cell lung cancer                                                           | 9  | 1.24 | 0.008837 | ITGB1, ITGA3, LAMB2, ITGA2, COL4A3, E2F1, COL4A6, RARB, COL4A5                                                                                                                                                                                                                                              | 270 | 84  | 7691  | 3.051984 | 0.833528 | 0.119589 | 0.108396 |
| GO_MF | GO:0070412~R-SMAD binding                                                                 | 5  | 0.69 | 0.008858 | JUN, ANKRD1, PMEPA1, FOS, SMAD6                                                                                                                                                                                                                                                                             | 608 | 24  | 17446 | 5.977933 | 0.998259 | 0.17569  | 0.171261 |
| GO_BP | GO:0003148~outflow tract septum morphogenesis                                             | 5  | 0.69 | 0.00945  | RARB, PARVA, SMAD6, FGFR2, BMPR1A                                                                                                                                                                                                                                                                           | 642 | 24  | 18082 | 5.867731 | 1        | 0.327712 | 0.324683 |
| GO_MF | GO:0005102~receptor binding                                                               | 25 | 3.45 | 0.009879 | ITGB1, ITGB5, NXPB3, H2-Q6, H2-Q7, H2-Q4, PLAT, VTCN1, SYNE1, DPP4, SLC9A3R2, ENSA, TAC4, FYN, RSP01, LDLRAP1, TNS2, WNT4, CADM4, F2R, LIF, GDF5, EML2, VEGFA, NECTIN4                                                                                                                                      | 608 | 412 | 17446 | 1.741146 | 0.999166 | 0.187286 | 0.182564 |
| GO_MF | GO:0048306~calcium-dependent protein binding                                              | 8  | 1.10 | 0.009968 | MYO1D, ANXA1, ANXA2, ANXA3, CALM2, S100A11, SYN1, VAMP2                                                                                                                                                                                                                                                     | 608 | 69  | 17446 | 3.32685  | 0.999217 | 0.187286 | 0.182564 |
| KEGG  | mmu04925:Aldosterone synthesis and secretion                                              | 9  | 1.24 | 0.010133 | NR4A2, NR4A1, DAGLA, NPR1, CREB3L1, ITPR3, ADCY1, CALM2, ADCY5                                                                                                                                                                                                                                              | 270 | 86  | 7691  | 2.981008 | 0.872205 | 0.122154 | 0.110721 |
| GO_BP | GO:0008285~negative regulation of cell proliferation                                      | 24 | 3.31 | 0.010326 | KANK2, ITGB1, BTG2, JUN, SRF, MAGI2, F2R, P3H2, LIF, ADM, SMAD6, CBFA2T3, PTPN14, WT1, DLC1, ALDH1A2, TIMP2, PMP22, NDN, SH3BP4, RARB, LZTS2, FGFR2, TNS2                                                                                                                                                   | 642 | 384 | 18082 | 1.760319 | 1        | 0.353571 | 0.350304 |
| GO_MF | GO:0008017~microtubule binding                                                            | 15 | 2.07 | 0.010387 | SGIP1, MTCL1, NDE1, EML1, EML2, DPYSL2, MAP1B, KIF5B, MAP1A, MAPT, TPPP, KIF3C, MAP4, CRYAB, DYNC111                                                                                                                                                                                                        | 608 | 200 | 17446 | 2.152056 | 0.999422 | 0.190165 | 0.185371 |
| GO_MF | GO:0003700~transcription factor activity, sequence-specific DNA binding                   | 45 | 6.21 | 0.010699 | FOXC2, FOXC1, SRF, NPAS2, ARNTL, RELB, FOXS1, DACH1, ZFP13, CREB3L1, ATOH8, HOXC5, E2F1, HOXC4, SOX8, HIVEP2, HOXC8, HOXC6, SOX5, TEAD4, FOXD2, JUN, FOXD1, STAT1, PBX2, FOS, FOXL1, MAFA, SMAD6, CBFA2T3, FOSL2, NR4A2, NR4A1, MYCL, NR4A3, MAFB, WT1, ELF4, FOSB, RARB, MAFK, LMX1B, ZFP772, ATF3, NFE2L1 | 608 | 883 | 17446 | 1.462326 | 0.999538 | 0.190982 | 0.186168 |
| KEGG  | mmu04918:Thyroid hormone synthesis                                                        | 8  | 1.10 | 0.010834 | CREB3L1, GPX8, GPX7, ITPR3, ADCY1, ATP1B2, TSHB, ADCY5                                                                                                                                                                                                                                                      | 270 | 70  | 7691  | 3.25545  | 0.88924  | 0.122154 | 0.110721 |
| KEGG  | mmu05200:Pathways in cancer                                                               | 24 | 3.31 | 0.010978 | PTGER4, ITGB1, JUN, ARHGEF12, FZD2, LAMB2, STAT1, ITGA3, ITGA2, F2R, TGFA, FOS, ADCY1, ADCY5, VEGFA, SMO, COL4A3, COL4A6, E2F1, RARB, COL4A5, FGFR2, FGFR1, WNT4                                                                                                                                            | 270 | 395 | 7691  | 1.730745 | 0.892455 | 0.122154 | 0.110721 |
| GO_MF | GO:0008467~[heparan sulfate]-glucosamine 3-sulfotransferase 1 activity                    | 3  | 0.41 | 0.011127 | HS3ST3B1, HS3ST3A1, HS3ST6                                                                                                                                                                                                                                                                                  | 608 | 5   | 17446 | 17.21645 | 0.999694 | 0.194703 | 0.189794 |
| GO_MF | GO:0042608~T cell receptor binding                                                        | 4  | 0.55 | 0.011453 | H2-Q6, H2-Q7, H2-Q4, FYN                                                                                                                                                                                                                                                                                    | 608 | 14  | 17446 | 8.198308 | 0.999732 | 0.194703 | 0.189794 |
| GO_BP | GO:0043410~positive regulation of MAPK cascade                                            | 10 | 1.38 | 0.011579 | ITGB1, C1QTNF1, KSR1, F2R, TIMP2, LIF, BNIP2, FGFR2, CDON, FGFR1                                                                                                                                                                                                                                            | 642 | 104 | 18082 | 2.708184 | 1        | 0.386494 | 0.382922 |

|       |                                                                 |    |      |          |                                                                                                                                                                                                                                                                                          |     |     |       |          |          |          |          |
|-------|-----------------------------------------------------------------|----|------|----------|------------------------------------------------------------------------------------------------------------------------------------------------------------------------------------------------------------------------------------------------------------------------------------------|-----|-----|-------|----------|----------|----------|----------|
| GO_BP | GO:0072162~metanephric mesenchymal cell differentiation         | 3  | 0.41 | 0.011684 | STAT1, TCF21, WNT4                                                                                                                                                                                                                                                                       | 642 | 5   | 18082 | 16.89907 | 1        | 0.386494 | 0.382922 |
| KEGG  | mmu04022:cGMP-PKG signaling pathway                             | 13 | 1.79 | 0.011686 | NPR1, SRF, PDE3B, ITPR3, ADCY1, ATP1B2, MYLK3, ADCY5, MYLK, CREB3L1, PDE3A, CALM2, PRKG1                                                                                                                                                                                                 | 270 | 163 | 7691  | 2.271825 | 0.906941 | 0.122154 | 0.110721 |
| GO_BP | GO:0014911~positive regulation of smooth muscle cell migration  | 6  | 0.83 | 0.011716 | PTGER4, P2RY6, TMSB4X, ITGA2, IL18, AGER                                                                                                                                                                                                                                                 | 642 | 39  | 18082 | 4.333094 | 1        | 0.386494 | 0.382922 |
| GO_BP | GO:0006915~apoptotic process                                    | 32 | 4.41 | 0.012489 | KANK2, MTCH1, STEAP3, HIP1, NOD1, PAK1, GRK5, ZFP385B, ADAMTSL4, E2F1, BNIP2, PEA15A, GSN, TNFRSF12A, GADD45B, SIVA1, STAT1, APLP1, NGB, UNC5C, SULF1, GULP1, NR4A1, WT1, STK26, DLC1, ELMO1, ELMO2, MAPT, FGFR2, FAIM, EPHA2                                                            | 642 | 570 | 18082 | 1.581199 | 1        | 0.404493 | 0.400754 |
| KEGG  | mmu04971:Gastric acid secretion                                 | 8  | 1.10 | 0.012554 | HRH2, ITPR3, ADCY1, ATP1B2, CALM2, MYLK3, ADCY5, MYLK                                                                                                                                                                                                                                    | 270 | 72  | 7691  | 3.165021 | 0.922069 | 0.122154 | 0.110721 |
| GO_BP | GO:0001954~positive regulation of cell-matrix adhesion          | 5  | 0.69 | 0.012575 | EPB41L5, PLEKHA2, DAG1, EMP2, UTRN                                                                                                                                                                                                                                                       | 642 | 26  | 18082 | 5.416367 | 1        | 0.404493 | 0.400754 |
| KEGG  | mmu04380:Osteoclast differentiation                             | 11 | 1.52 | 0.012637 | JUN, NCF2, IFNGR1, STAT1, FOSB, SIRPA, FYN, GAB2, FOS, RELB, FOSL2                                                                                                                                                                                                                       | 270 | 126 | 7691  | 2.486802 | 0.923378 | 0.122154 | 0.110721 |
| GO_BP | GO:0001568~blood vessel development                             | 8  | 1.10 | 0.012742 | TGFBR3, FOXC2, FOXC1, FOXS1, COL1A2, ALDH1A2, VEGFA, EPHA2                                                                                                                                                                                                                               | 642 | 71  | 18082 | 3.173533 | 1        | 0.404493 | 0.400754 |
| GO_BP | GO:0034613~cellular protein localization                        | 7  | 0.97 | 0.012882 | ARMCX3, PRKCI, FRMD6, LATS2, RRAGB, AJUBA, OPTN                                                                                                                                                                                                                                          | 642 | 55  | 18082 | 3.58465  | 1        | 0.404493 | 0.400754 |
| GO_BP | GO:0034446~substrate adhesion-dependent cell spreading          | 6  | 0.83 | 0.01301  | AXL, FNDC3B, TYRO3, PARVA, MERTK, SRGAP2                                                                                                                                                                                                                                                 | 642 | 40  | 18082 | 4.224766 | 1        | 0.404493 | 0.400754 |
| GO_MF | GO:0042803~protein homodimerization activity                    | 41 | 5.66 | 0.013153 | ZFP423, HIP1, TENM3, MTCL1, SRF, PTPRO, NPR3, BHLHE41, IL6RA, NOD1, SYNE1, DPP4, S100A13, LRRFIP1, SRGAP2, PRKG1, PDZD7, JUN, CADM4, ANXA1, PRMT2, STAT1, ACTN1, TPM1, INHBB, ACTN4, VEGFA, DLK2, NR4A1, NR4A3, GDNF, STK26, MYH9, NECTIN4, ACP, CRYAB, NBL1, ATF3, FGFR2, BMPR1A, FGFR1 | 608 | 798 | 17446 | 1.474257 | 0.999922 | 0.213869 | 0.208477 |
| GO_MF | GO:0048365~Rac GTPase binding                                   | 6  | 0.83 | 0.013363 | DOCK4, NCF2, IQGAP1, IQGAP2, SRGAP2, SRGAP1                                                                                                                                                                                                                                              | 608 | 41  | 17446 | 4.199134 | 0.999933 | 0.213869 | 0.208477 |
| GO_MF | GO:0045499~chemorepellent activity                              | 5  | 0.69 | 0.013479 | SEMA5A, SEMA6C, FLRT2, SEMA3G, SEMA3E                                                                                                                                                                                                                                                    | 608 | 27  | 17446 | 5.313718 | 0.999938 | 0.213869 | 0.208477 |
| GO_BP | GO:0007409~axonogenesis                                         | 10 | 1.38 | 0.013776 | NTNG2, LINGO1, PAK1, CNP, LRTM2, MAP1B, NDN, MAPT, ADCY1, FGFR2                                                                                                                                                                                                                          | 642 | 107 | 18082 | 2.632253 | 1        | 0.41871  | 0.414841 |
| GO_BP | GO:0001501~skeletal system development                          | 10 | 1.38 | 0.013776 | CDKN1C, FOXC2, FOXC1, RASSF2, PKDCC, COL1A2, NPR3, WFIKKN2, HOXC4, EPHA2                                                                                                                                                                                                                 | 642 | 107 | 18082 | 2.632253 | 1        | 0.41871  | 0.414841 |
| GO_BP | GO:0045893~positive regulation of transcription, DNA-templated  | 32 | 4.41 | 0.014275 | CDKN1C, FOXC2, FOXC1, ZFP423, SRF, SETD7, SCX, ABRA, NPAS2, ARNTL, TMSB4X, ATOH8, E2F1, SOX8, WNT4, JUN, FZD2, PRMT2, STAT1, F2R, FOS, MAFA, FOSL2, NR4A2, NR4A1, NR4A3, SMO, MDFIC, WT1, BAMBI, ELF4, BMPR1A                                                                            | 642 | 576 | 18082 | 1.564728 | 1        | 0.423271 | 0.419359 |
| GO_BP | GO:0070830~bicellular tight junction assembly                   | 5  | 0.69 | 0.014357 | ITGB1, SRF, RAB13, ACTN4, MPP5                                                                                                                                                                                                                                                           | 642 | 27  | 18082 | 5.215761 | 1        | 0.423271 | 0.419359 |
| GO_BP | GO:0010595~positive regulation of endothelial cell migration    | 6  | 0.83 | 0.014396 | FOXC2, SPARC, ANXA3, ATOH8, SASH1, VEGFA                                                                                                                                                                                                                                                 | 642 | 41  | 18082 | 4.121723 | 1        | 0.423271 | 0.419359 |
| KEGG  | mmu04010:MAPK signaling pathway                                 | 17 | 2.34 | 0.014596 | JUN, DUSP3, GADD45B, GADD45A, SRF, RRAS2, ARR1, FOS, DUSP8, RELB, NR4A1, PAK1, DUSP10, RRAS, MAPT, FGFR2, FGFR1                                                                                                                                                                          | 270 | 251 | 7691  | 1.929275 | 0.948705 | 0.134683 | 0.122077 |
| GO_BP | GO:0043149~stress fiber assembly                                | 4  | 0.55 | 0.014672 | ITGB1, ITGB5, SRF, ARR1                                                                                                                                                                                                                                                                  | 642 | 15  | 18082 | 7.510696 | 1        | 0.426758 | 0.422814 |
| GO_BP | GO:0010628~positive regulation of gene expression               | 24 | 3.31 | 0.015741 | PTGER4, SEC16B, FOXC1, GSN, FOXD1, ITGA3, NTRK3, IL18, LIF, SCX, VASH1, AGER, VEGFA, RELB, C1QTNF1, SMO, MUSTN1, ALDH1A2, E2F1, SOX8, QK, VIM, ATF3, FGFR2                                                                                                                               | 642 | 399 | 18082 | 1.694142 | 1        | 0.452105 | 0.447926 |
| KEGG  | mmu04921:Oxytocin signaling pathway                             | 12 | 1.66 | 0.015863 | GNAO1, MYL6, JUN, NPR1, KCNJ12, ITPR3, ADCY1, FOS, CALM2, MYLK3, ADCY5, MYLK                                                                                                                                                                                                             | 270 | 150 | 7691  | 2.278815 | 0.960441 | 0.140005 | 0.126902 |
| GO_BP | GO:0010811~positive regulation of cell-substrate adhesion       | 6  | 0.83 | 0.015878 | ITGB1, CCDC80, ITGA3, EMILIN1, NPNT, CYR61                                                                                                                                                                                                                                               | 642 | 42  | 18082 | 4.023587 | 1        | 0.452105 | 0.447926 |
| GO_BP | GO:0042542~response to hydrogen peroxide                        | 7  | 0.97 | 0.016463 | GNAO1, JUN, NR4A3, GJA3, STAT1, STK26, CRYAB                                                                                                                                                                                                                                             | 642 | 58  | 18082 | 3.399237 | 1        | 0.463874 | 0.459587 |
| GO_MF | GO:0004859~phospholipase inhibitor activity                     | 3  | 0.41 | 0.016517 | ANXA1, ANXA2, ANXA3                                                                                                                                                                                                                                                                      | 608 | 6   | 17446 | 14.34704 | 0.999993 | 0.256371 | 0.249908 |
| GO_BP | GO:0097350~neutrophil clearance                                 | 3  | 0.41 | 0.017117 | ANXA1, AXL, MERTK                                                                                                                                                                                                                                                                        | 642 | 6   | 18082 | 14.08255 | 1        | 0.471118 | 0.466764 |
| GO_BP | GO:0001974~blood vessel remodeling                              | 6  | 0.83 | 0.017458 | TGFBR3, FOXC2, FOXC1, AXL, LIF, VEGFA                                                                                                                                                                                                                                                    | 642 | 43  | 18082 | 3.930015 | 1        | 0.471118 | 0.466764 |
| GO_BP | GO:0048013~ephrin receptor signaling pathway                    | 6  | 0.83 | 0.017458 | EFNB1, EPHA6, NCK2, FYN, EPHB1, EPHA2                                                                                                                                                                                                                                                    | 642 | 43  | 18082 | 3.930015 | 1        | 0.471118 | 0.466764 |
| GO_BP | GO:0090303~positive regulation of wound healing                 | 4  | 0.55 | 0.017591 | PTGER4, KANK1, ANXA1, MYLK                                                                                                                                                                                                                                                               | 642 | 16  | 18082 | 7.041277 | 1        | 0.471118 | 0.466764 |
| GO_BP | GO:0006198~cAMP catabolic process                               | 4  | 0.55 | 0.017591 | PDE10A, PDE3B, PDE4B, PDE3A                                                                                                                                                                                                                                                              | 642 | 16  | 18082 | 7.041277 | 1        | 0.471118 | 0.466764 |
| GO_MF | GO:0005096~GTPase activator activity                            | 16 | 2.21 | 0.017798 | DOCK4, JUN, ARHGAP12, ARHGAP19, AGAP1, ARHGAP28, ARR1, SIPA1L2, ARHGAP24, ARHGAP23, ARHGAP33, ARHGAP44, ABR, DLC1, SRGAP2, SRGAP1                                                                                                                                                        | 608 | 235 | 17446 | 1.953639 | 0.999997 | 0.270382 | 0.263566 |
| GO_BP | GO:0050679~positive regulation of epithelial cell proliferation | 8  | 1.10 | 0.018028 | NR4A3, SMO, HTRA1, GAS1, TGFA, FGFR2, VEGFA, BMPR1A                                                                                                                                                                                                                                      | 642 | 76  | 18082 | 2.964748 | 1        | 0.478107 | 0.473688 |
| GO_BP | GO:0043392~negative regulation of DNA binding                   | 5  | 0.69 | 0.018381 | JUN, SMO, WFIKKN2, E2F1, ZFP462                                                                                                                                                                                                                                                          | 642 | 29  | 18082 | 4.856053 | 1        | 0.479081 | 0.474654 |
| GO_BP | GO:0042060~wound healing                                        | 9  | 1.24 | 0.018419 | PAK1, SPARC, SDC4, PTK7, MUSTN1, ITGA2, TPM1, TGFA, DCBLD2                                                                                                                                                                                                                               | 642 | 94  | 18082 | 2.696659 | 1        | 0.479081 | 0.474654 |
| KEGG  | mmu05132:Salmonella infection                                   | 8  | 1.10 | 0.018886 | TJP1, JUN, IFNGR1, IL18, FOS, KLC1, RAB7B, DYNC1I1                                                                                                                                                                                                                                       | 270 | 78  | 7691  | 2.921557 | 0.97875  | 0.159741 | 0.14479  |
| GO_BP | GO:0042552~myelination                                          | 7  | 0.97 | 0.019199 | CLDN5, NAB1, NAB2, PMP22, QK, FYN, TSPAN2                                                                                                                                                                                                                                                | 642 | 60  | 18082 | 3.285929 | 1        | 0.481081 | 0.476635 |
| GO_BP | GO:0030198~extracellular matrix organization                    | 10 | 1.38 | 0.020084 | COL18A1, CCDC80, ADAMTSL4, LAMB2, APLP1, COL4A6, EMILIN1, NPNT, RECK, CYR61                                                                                                                                                                                                              | 642 | 114 | 18082 | 2.470624 | 1        | 0.481081 | 0.476635 |
| KEGG  | mmu04144:Endocytosis                                            | 17 | 2.34 | 0.020389 | PRKCI, H2-Q6, H2-Q7, AGAP1, ARR1, PLD1, EPN3, EHD2, PARD6B, EHD4, GRK5, KIF5B, PSD3, AMPH, LDLRAP1, FGFR2, ARF6                                                                                                                                                                          | 270 | 261 | 7691  | 1.855357 | 0.98441  | 0.165558 | 0.150062 |
| GO_BP | GO:0043010~camera-type eye development                          | 8  | 1.10 | 0.020521 | CDKN1C, FOXC2, FOXC1, WT1, ALDH1A2, GAS1, LMX1B, CRYAB                                                                                                                                                                                                                                   | 642 | 78  | 18082 | 2.888729 | 1        | 0.481081 | 0.476635 |
| GO_BP | GO:0007160~cell-matrix adhesion                                 | 8  | 1.10 | 0.020521 | ITGB1, BCAM, ITGB5, SRF, ITGA2, SIRPA, EMP2, NPNT                                                                                                                                                                                                                                        | 642 | 78  | 18082 | 2.888729 | 1        | 0.481081 | 0.476635 |

|       |                                                                                           |    |      |          |                                                                                                                               |     |     |       |          |          |          |          |
|-------|-------------------------------------------------------------------------------------------|----|------|----------|-------------------------------------------------------------------------------------------------------------------------------|-----|-----|-------|----------|----------|----------|----------|
| GO_BP | GO:0007568~aging                                                                          | 13 | 1.79 | 0.020546 | CDKN1C, JUN, GSN, CNP, IGFBP2, ADM, FOS, PPP1R9B, GNAO1, UCP2, TIMP2, NCAM1, CRYAB                                            | 642 | 173 | 18082 | 2.116453 | 1        | 0.481081 | 0.476635 |
| GO_BP | GO:0001701~in utero embryonic development                                                 | 19 | 2.62 | 0.020617 | TEAD4, ITGB1, FOXC1, DUSP3, SRF, TPM1, VEGFA, TGFB3, EPB41L5, MYO1E, SMO, SPEG, MYH9, SOX8, APBA1, FGFR2, SOX5, FGFR1, BMPR1A | 642 | 299 | 18082 | 1.789756 | 1        | 0.481081 | 0.476635 |
| GO_BP | GO:0071560~cellular response to transforming growth factor beta stimulus                  | 7  | 0.97 | 0.020677 | EPB41L5, PDE3A, ANKRD1, SCX, FYN, WNT4, SOX5                                                                                  | 642 | 61  | 18082 | 3.232062 | 1        | 0.481081 | 0.476635 |
| GO_BP | GO:0002042~cell migration involved in sprouting angiogenesis                              | 4  | 0.55 | 0.020808 | ITGB1, NR4A1, SRF, VEGFA                                                                                                      | 642 | 17  | 18082 | 6.627084 | 1        | 0.481081 | 0.476635 |
| GO_BP | GO:0035024~negative regulation of Rho protein signal transduction                         | 4  | 0.55 | 0.020808 | ITGB1, KANK1, ITGA3, DLC1                                                                                                     | 642 | 17  | 18082 | 6.627084 | 1        | 0.481081 | 0.476635 |
| GO_BP | GO:1900745~positive regulation of p38MAPK cascade                                         | 4  | 0.55 | 0.020808 | GADD45B, GADD45A, SASH1, VEGFA                                                                                                | 642 | 17  | 18082 | 6.627084 | 1        | 0.481081 | 0.476635 |
| GO_BP | GO:0014032~neural crest cell development                                                  | 4  | 0.55 | 0.020808 | FOXC2, FOXC1, ALDH1A2, BMPR1A                                                                                                 | 642 | 17  | 18082 | 6.627084 | 1        | 0.481081 | 0.476635 |
| GO_BP | GO:0014002~astrocyte development                                                          | 4  | 0.55 | 0.020808 | LAMB2, TSPAN2, VIM, AGER                                                                                                      | 642 | 17  | 18082 | 6.627084 | 1        | 0.481081 | 0.476635 |
| GO_BP | GO:0042692~muscle cell differentiation                                                    | 4  | 0.55 | 0.020808 | ANKRD1, SPEG, QK, SYNE1                                                                                                       | 642 | 17  | 18082 | 6.627084 | 1        | 0.481081 | 0.476635 |
| GO_MF | GO:0016791~phosphatase activity                                                           | 10 | 1.38 | 0.022033 | DUSP10, DUSP3, PTPRO, PTPN21, PTPN12, DUSP15, DUSP8, ACPP, PTPN14, CDC14A                                                     | 608 | 118 | 17446 | 2.431702 | 1        | 0.327734 | 0.319472 |
| GO_MF | GO:0003836~beta-galactoside (CMP) alpha-2,3-sialyltransferase activity                    | 3  | 0.41 | 0.022595 | ST3GAL6, ST3GAL1, ST3GAL3                                                                                                     | 608 | 7   | 17446 | 12.29746 | 1        | 0.328749 | 0.320461 |
| GO_BP | GO:0002062~chondrocyte differentiation                                                    | 6  | 0.83 | 0.022812 | MUSTN1, ARID5A, SCX, GDF5, FGFR1, BMPR1A                                                                                      | 642 | 46  | 18082 | 3.67371  | 1        | 0.500786 | 0.496158 |
| GO_BP | GO:0001837~epithelial to mesenchymal transition                                           | 5  | 0.69 | 0.02304  | TGFB3, EPB41L5, FGFR2, LOXL2, WNT4                                                                                            | 642 | 31  | 18082 | 4.54276  | 1        | 0.500786 | 0.496158 |
| GO_MF | GO:0051393~alpha-actinin binding                                                          | 4  | 0.55 | 0.023165 | ITGB1, PDLIM2, NPHS1, DAG1                                                                                                    | 608 | 18  | 17446 | 6.376462 | 1        | 0.328749 | 0.320461 |
| GO_BP | GO:0072112~glomerular visceral epithelial cell differentiation                            | 3  | 0.41 | 0.023406 | FOXC2, WT1, PTPRO                                                                                                             | 642 | 7   | 18082 | 12.07076 | 1        | 0.500786 | 0.496158 |
| GO_BP | GO:0002043~blood vessel endothelial cell proliferation involved in sprouting angiogenesis | 3  | 0.41 | 0.023406 | SEMA5A, VEGFA, EPHA2                                                                                                          | 642 | 7   | 18082 | 12.07076 | 1        | 0.500786 | 0.496158 |
| GO_BP | GO:0014037~Schwann cell differentiation                                                   | 3  | 0.41 | 0.023406 | NAB1, GPC1, NAB2                                                                                                              | 642 | 7   | 18082 | 12.07076 | 1        | 0.500786 | 0.496158 |
| GO_BP | GO:0032288~myelin assembly                                                                | 3  | 0.41 | 0.023406 | GPC1, PMP22, MPP5                                                                                                             | 642 | 7   | 18082 | 12.07076 | 1        | 0.500786 | 0.496158 |
| GO_BP | GO:0032534~regulation of microvillus assembly                                             | 3  | 0.41 | 0.023406 | PODXL, ATP8B1, PLD1                                                                                                           | 642 | 7   | 18082 | 12.07076 | 1        | 0.500786 | 0.496158 |
| GO_BP | GO:0048842~positive regulation of axon extension involved in axon guidance                | 3  | 0.41 | 0.023406 | SEMA5A, MEGF8, VEGFA                                                                                                          | 642 | 7   | 18082 | 12.07076 | 1        | 0.500786 | 0.496158 |
| GO_MF | GO:0004721~phosphoprotein phosphatase activity                                            | 11 | 1.52 | 0.023482 | DUSP10, DUSP3, EYA4, PTPRO, PTPN21, PTPN12, DUSP15, DUSP8, PTPN14, CDC14A, TNS2                                               | 608 | 139 | 17446 | 2.270754 | 1        | 0.328749 | 0.320461 |
| GO_BP | GO:0009612~response to mechanical stimulus                                                | 7  | 0.97 | 0.02386  | BTG2, JUN, STAT1, IGFBP2, FOSB, INHBB, ASIC2                                                                                  | 642 | 63  | 18082 | 3.129457 | 1        | 0.500786 | 0.496158 |
| GO_BP | GO:0030326~embryonic limb morphogenesis                                                   | 7  | 0.97 | 0.02386  | MUSTN1, ALDH1A2, PBX2, LMX1B, MEGF8, GDF5, FGFR1                                                                              | 642 | 63  | 18082 | 3.129457 | 1        | 0.500786 | 0.496158 |
| GO_BP | GO:0030111~regulation of Wnt signaling pathway                                            | 4  | 0.55 | 0.024326 | DCDC2A, MDFIC, ITGA3, FOXL1                                                                                                   | 642 | 18  | 18082 | 6.258913 | 1        | 0.500786 | 0.496158 |
| GO_BP | GO:0060996~dendritic spine development                                                    | 4  | 0.55 | 0.024326 | PAK1, NCK2, SRGAP2, EPHB1                                                                                                     | 642 | 18  | 18082 | 6.258913 | 1        | 0.500786 | 0.496158 |
| GO_BP | GO:0051693~actin filament capping                                                         | 4  | 0.55 | 0.024326 | GSN, TPM1, MYH9, SPTB                                                                                                         | 642 | 18  | 18082 | 6.258913 | 1        | 0.500786 | 0.496158 |
| GO_BP | GO:0007166~cell surface receptor signaling pathway                                        | 15 | 2.07 | 0.024598 | GLP1R, FZD2, ANXA1, CD151, NPR1, VASN, TSPAN15, CD59B, TSPAN13, SMO, TSPAN17, COL4A3, NCAM1, FYN, TSPAN2                      | 642 | 219 | 18082 | 1.929117 | 1        | 0.500786 | 0.496158 |
| GO_BP | GO:0007565~female pregnancy                                                               | 8  | 1.10 | 0.024693 | ENDOU, ITGA2, UCP2, IGFBP2, FOSB, UPRT, ADM, FOS                                                                              | 642 | 81  | 18082 | 2.781739 | 1        | 0.500786 | 0.496158 |
| GO_BP | GO:0007265~Ras protein signal transduction                                                | 6  | 0.83 | 0.024808 | DOK1, RIT1, JUN, KSR1, PLCE1, RRAS2                                                                                           | 642 | 47  | 18082 | 3.595546 | 1        | 0.500786 | 0.496158 |
| GO_BP | GO:0050796~regulation of insulin secretion                                                | 6  | 0.83 | 0.024808 | STXBP1, PDE3B, ENSA, SYT9, VAMP2, ARNTL                                                                                       | 642 | 47  | 18082 | 3.595546 | 1        | 0.500786 | 0.496158 |
| GO_BP | GO:0007605~sensory perception of sound                                                    | 11 | 1.52 | 0.025168 | TJP1, SLC9A3R2, CLIC5, SRRM4, DCDC2A, SERPINB6A, ATP8B1, EYA4, MAP1A, ASIC2, FGFR1                                            | 642 | 138 | 18082 | 2.245045 | 1        | 0.504297 | 0.499636 |
| GO_BP | GO:0001658~branching involved in ureteric bud morphogenesis                               | 6  | 0.83 | 0.026912 | FOXD1, GDNF, WT1, TCF21, NPNT, WNT4                                                                                           | 642 | 48  | 18082 | 3.520639 | 1        | 0.535281 | 0.530333 |
| KEGG  | mmu00510:N-Glycan biosynthesis                                                            | 6  | 0.83 | 0.027439 | ST6GAL1, MAN1A2, MGAT5, MGAT4A, MGAT5B, ALG14                                                                                 | 270 | 49  | 7691  | 3.487982 | 0.996376 | 0.214234 | 0.194183 |
| GO_BP | GO:0006897~endocytosis                                                                    | 13 | 1.79 | 0.027995 | HIP1, SGIP1, WIPF3, APLP1, STON1, ARRB1, STON2, MRC2, EHD2, MYO1E, DPYSL2, SH3BP4, LDLRAP1                                    | 642 | 181 | 18082 | 2.022908 | 1        | 0.536121 | 0.531166 |
| GO_BP | GO:0048255~mRNA stabilization                                                             | 4  | 0.55 | 0.028144 | GDNF, E2F1, QK, VEGFA                                                                                                         | 642 | 19  | 18082 | 5.929497 | 1        | 0.536121 | 0.531166 |
| GO_BP | GO:0048598~embryonic morphogenesis                                                        | 4  | 0.55 | 0.028144 | GAS1, AI597479, CDON, BMPR1A                                                                                                  | 642 | 19  | 18082 | 5.929497 | 1        | 0.536121 | 0.531166 |
| GO_BP | GO:0031589~cell-substrate adhesion                                                        | 4  | 0.55 | 0.028144 | ITGB1, ITGA2, SMAD6, EPHB1                                                                                                    | 642 | 19  | 18082 | 5.929497 | 1        | 0.536121 | 0.531166 |
| GO_BP | GO:0010951~negative regulation of endopeptidase activity                                  | 4  | 0.55 | 0.028144 | CRB2, SERPINB6A, SERPINB6B, TIMP2                                                                                             | 642 | 19  | 18082 | 5.929497 | 1        | 0.536121 | 0.531166 |
| GO_BP | GO:0050880~regulation of blood vessel size                                                | 4  | 0.55 | 0.028144 | TGFB3, FOXC2, FOXC1, NPR1                                                                                                     | 642 | 19  | 18082 | 5.929497 | 1        | 0.536121 | 0.531166 |

|       |                                                                                             |    |      |          |                                                                                                                                                                                                                          |     |     |       |          |          |          |          |
|-------|---------------------------------------------------------------------------------------------|----|------|----------|--------------------------------------------------------------------------------------------------------------------------------------------------------------------------------------------------------------------------|-----|-----|-------|----------|----------|----------|----------|
| GO_MF | GO:0008046~axon guidance receptor activity                                                  | 3  | 0.41 | 0.029441 | ROBO2, SEMA5A, EPHB1                                                                                                                                                                                                     | 608 | 8   | 17446 | 10.76028 | 1        | 0.389484 | 0.379666 |
| GO_MF | GO:0046977~TAP binding                                                                      | 3  | 0.41 | 0.029441 | H2-Q6, H2-Q7, H2-Q4                                                                                                                                                                                                      | 608 | 8   | 17446 | 10.76028 | 1        | 0.389484 | 0.379666 |
| GO_MF | GO:0070888~E-box binding                                                                    | 5  | 0.69 | 0.029457 | ATOH8, BHLHE41, SCX, TCF21, ARNTL                                                                                                                                                                                        | 608 | 34  | 17446 | 4.219717 | 1        | 0.389484 | 0.379666 |
| GO_MF | GO:0016757~transferase activity, transferring glycosyl groups                               | 14 | 1.93 | 0.030364 | COLGALT2, ST6GAL1, GALNT10, EXTL1, MGAT5, MGAT4A, MGAT5B, B3GALT2, ST3GAL6, LARGE1, ST6GALNAC3, ST3GAL1, ST6GALNAC6, ST3GAL3                                                                                             | 608 | 208 | 17446 | 1.931332 | 1        | 0.393952 | 0.384021 |
| KEGG  | mmu04540:Gap junction                                                                       | 8  | 1.10 | 0.030419 | TJP1, TUBB2B, TUBB2A, TUBA1A, ITPR3, ADCY1, PRKG1, ADCY5                                                                                                                                                                 | 270 | 86  | 7691  | 2.649785 | 0.99805  | 0.228704 | 0.207298 |
| GO_BP | GO:0032287~peripheral nervous system myelin maintenance                                     | 3  | 0.41 | 0.030484 | FA2H, PRX, MPP5                                                                                                                                                                                                          | 642 | 8   | 18082 | 10.56192 | 1        | 0.568676 | 0.563421 |
| GO_BP | GO:0010518~positive regulation of phospholipase activity                                    | 3  | 0.41 | 0.030484 | HPCA, CYR61, FGFR2                                                                                                                                                                                                       | 642 | 8   | 18082 | 10.56192 | 1        | 0.568676 | 0.563421 |
| GO_BP | GO:0038063~collagen-activated tyrosine kinase receptor signaling pathway                    | 3  | 0.41 | 0.030484 | COL4A3, COL4A6, COL4A5                                                                                                                                                                                                   | 642 | 8   | 18082 | 10.56192 | 1        | 0.568676 | 0.563421 |
| GO_MF | GO:0042802~identical protein binding                                                        | 32 | 4.41 | 0.030898 | ROBO2, GPSM2, FOXC2, STXBP1, HSPB8, NOD1, AGER, DPP4, GJA3, BNIP2, SH3BP4, EMILIN1, JUN, STAT1, NDE1, APLP1, SNCAIP, SMAD6, GDF5, VEGFA, NELL2, CLDN5, COL1A2, STK26, AMOTL2, VIM, MICU1, ACPP, CRYAB, ATF3, OPTN, FGFR1 | 608 | 625 | 17446 | 1.469137 | 1        | 0.393952 | 0.384021 |
| GO_BP | GO:0006919~activation of cysteine-type endopeptidase activity involved in apoptotic process | 7  | 0.97 | 0.031174 | MTCH1, HIP1, STAT1, DLC1, COL4A3, F2R, NOD1                                                                                                                                                                              | 642 | 67  | 18082 | 2.942623 | 1        | 0.571029 | 0.565751 |
| GO_BP | GO:0048709~oligodendrocyte differentiation                                                  | 5  | 0.69 | 0.031264 | DUSP10, CNP, SOX8, TSPAN2, SOX5                                                                                                                                                                                          | 642 | 34  | 18082 | 4.141928 | 1        | 0.571029 | 0.565751 |
| GO_BP | GO:0071526~semaphorin-plexin signaling pathway                                              | 5  | 0.69 | 0.031264 | SEMA5A, SEMA6C, SEMA3G, PLXNB1, SEMA3E                                                                                                                                                                                   | 642 | 34  | 18082 | 4.141928 | 1        | 0.571029 | 0.565751 |
| GO_BP | GO:0006936~muscle contraction                                                               | 6  | 0.83 | 0.031454 | CHRN1, MYL6, ANXA1, ANXA2, TMOD3, MYOM2                                                                                                                                                                                  | 642 | 50  | 18082 | 3.379813 | 1        | 0.571029 | 0.565751 |
| GO_BP | GO:0007520~myoblast fusion                                                                  | 4  | 0.55 | 0.03226  | NPHS1, MYH9, PLEKHO1, CDON                                                                                                                                                                                               | 642 | 20  | 18082 | 5.633022 | 1        | 0.581757 | 0.57638  |
| GO_BP | GO:0001570~vasculogenesis                                                                   | 7  | 0.97 | 0.033207 | TGFBR3, MYO1E, SMO, WT1, QK, ADM, EPHA2                                                                                                                                                                                  | 642 | 68  | 18082 | 2.899349 | 1        | 0.594859 | 0.589361 |
| KEGG  | mmu04270:Vascular smooth muscle contraction                                                 | 10 | 1.38 | 0.033605 | MYL6, ARHGEF12, NPR1, ITPR3, ADCY1, CALM2, PRKG1, MYLK3, ADCY5, MYLK                                                                                                                                                     | 270 | 127 | 7691  | 2.242928 | 0.998997 | 0.243633 | 0.22083  |
| GO_BP | GO:0051591~response to cAMP                                                                 | 6  | 0.83 | 0.033894 | JUN, SPARC, STAT1, PDE3A, FOSB, FOS                                                                                                                                                                                      | 642 | 51  | 18082 | 3.313542 | 1        | 0.603178 | 0.597604 |
| GO_BP | GO:0001707~mesoderm formation                                                               | 5  | 0.69 | 0.034341 | CRB2, NR4A3, SRF, SCX, BMPR1A                                                                                                                                                                                            | 642 | 35  | 18082 | 4.023587 | 1        | 0.607137 | 0.601526 |
| GO_MF | GO:0030215~semaphorin receptor binding                                                      | 4  | 0.55 | 0.034972 | SEMA5A, SEMA6C, SEMA3G, SEMA3E                                                                                                                                                                                           | 608 | 21  | 17446 | 5.465539 | 1        | 0.435777 | 0.424791 |
| GO_MF | GO:0035091~phosphatidylinositol binding                                                     | 8  | 1.10 | 0.035399 | ARHGAP33, MYO1E, HIP1, SH3PXD2A, ITPR3, PXDC1, PLD1, SNX31                                                                                                                                                               | 608 | 89  | 17446 | 2.579243 | 1        | 0.435777 | 0.424791 |
| GO_BP | GO:0031532~actin cytoskeleton reorganization                                                | 6  | 0.83 | 0.036448 | PAK1, ANXA1, PTK7, NPHS2, MYH9, PARVA                                                                                                                                                                                    | 642 | 52  | 18082 | 3.24982  | 1        | 0.635366 | 0.629494 |
| GO_MF | GO:0008146~sulfotransferase activity                                                        | 6  | 0.83 | 0.036539 | HS3ST3B1, HS3ST3A1, UST, CHST1, CHST14, HS3ST6                                                                                                                                                                           | 608 | 53  | 17446 | 3.248386 | 1        | 0.440212 | 0.429114 |
| GO_BP | GO:0032869~cellular response to insulin stimulus                                            | 8  | 1.10 | 0.036604 | PRKCI, PAK1, STAT1, PDE3B, UCP2, RAB13, INHBB, VAMP2                                                                                                                                                                     | 642 | 88  | 18082 | 2.560464 | 1        | 0.635366 | 0.629494 |
| GO_BP | GO:0051412~response to corticosterone                                                       | 4  | 0.55 | 0.036672 | NTRK3, FOSB, FOS, CALM2                                                                                                                                                                                                  | 642 | 21  | 18082 | 5.364783 | 1        | 0.635366 | 0.629494 |
| GO_MF | GO:0035612~AP-2 adaptor complex binding                                                     | 3  | 0.41 | 0.036993 | HIP1, ARRB1, LDLRAP1                                                                                                                                                                                                     | 608 | 9   | 17446 | 9.564693 | 1        | 0.440212 | 0.429114 |
| KEGG  | mmu04924:Renin secretion                                                                    | 7  | 0.97 | 0.037251 | PTGER4, NPR1, PDE3B, PDE3A, ITPR3, CALM2, ADCY5                                                                                                                                                                          | 270 | 71  | 7691  | 2.808399 | 0.999533 | 0.260757 | 0.236351 |
| GO_BP | GO:0006468~protein phosphorylation                                                          | 30 | 4.14 | 0.037431 | RNASEL, PKDCC, MAST4, NPR1, MYLK3, MYLK, PAK1, GRK5, SPEG, NEK1, FYN, ST3GAL1, EPHB1, PRKG1, PRKCI, EPHA6, KSR1, MLKL, NTRK3, MERTK, LATS2, PTK7, AXL, STK26, TYRO3, TRIB2, FGFR2, BMPR1A, EPHA2, FGFR1                  | 642 | 576 | 18082 | 1.466933 | 1        | 0.635366 | 0.629494 |
| GO_BP | GO:0051965~positive regulation of synapse assembly                                          | 7  | 0.97 | 0.037525 | LINGO2, FLRT2, LRTM2, NTRK3, AMIGO2, ASIC2, EPHB1                                                                                                                                                                        | 642 | 70  | 18082 | 2.816511 | 1        | 0.635366 | 0.629494 |
| GO_BP | GO:0042088~T-helper 1 type immune response                                                  | 3  | 0.41 | 0.038286 | IL18, RELB, VEGFA                                                                                                                                                                                                        | 642 | 9   | 18082 | 9.38837  | 1        | 0.635366 | 0.629494 |
| GO_BP | GO:0031340~positive regulation of vesicle fusion                                            | 3  | 0.41 | 0.038286 | ANXA1, ANXA2, KIF5B                                                                                                                                                                                                      | 642 | 9   | 18082 | 9.38837  | 1        | 0.635366 | 0.629494 |
| GO_BP | GO:0060426~lung vasculature development                                                     | 3  | 0.41 | 0.038286 | LIF, TCF21, VEGFA                                                                                                                                                                                                        | 642 | 9   | 18082 | 9.38837  | 1        | 0.635366 | 0.629494 |
| GO_BP | GO:0060539~diaphragm development                                                            | 3  | 0.41 | 0.038286 | WT1, TCF21, DISP1                                                                                                                                                                                                        | 642 | 9   | 18082 | 9.38837  | 1        | 0.635366 | 0.629494 |
| GO_BP | GO:0016043~cellular component organization                                                  | 3  | 0.41 | 0.038286 | FMNL2, INF2, DAAM2                                                                                                                                                                                                       | 642 | 9   | 18082 | 9.38837  | 1        | 0.635366 | 0.629494 |
| GO_BP | GO:0071277~cellular response to calcium ion                                                 | 6  | 0.83 | 0.039117 | JUN, FOSB, IQGAP1, ADCY1, FOS, MYLK                                                                                                                                                                                      | 642 | 53  | 18082 | 3.188503 | 1        | 0.645199 | 0.639236 |
| KEGG  | mmu04520:Adherens junction                                                                  | 7  | 0.97 | 0.039496 | TJP1, ACTN1, FYN, ACTN4, IQGAP1, NECTIN4, FGFR1                                                                                                                                                                          | 270 | 72  | 7691  | 2.769393 | 0.999708 | 0.267258 | 0.242244 |
| GO_BP | GO:0060976~coronary vasculature development                                                 | 5  | 0.69 | 0.041005 | TGFBR3, PTK7, WT1, MEGF8, SMAD6                                                                                                                                                                                          | 642 | 37  | 18082 | 3.806096 | 1        | 0.666207 | 0.66005  |
| GO_BP | GO:0008219~cell death                                                                       | 5  | 0.69 | 0.041005 | PARP4, PMP22, EMP2, EMP3, SNCAIP                                                                                                                                                                                         | 642 | 37  | 18082 | 3.806096 | 1        | 0.666207 | 0.66005  |
| GO_BP | GO:0031668~cellular response to extracellular stimulus                                      | 4  | 0.55 | 0.041376 | NR4A2, GSDMD, AXL, FOS                                                                                                                                                                                                   | 642 | 22  | 18082 | 5.120929 | 1        | 0.666207 | 0.66005  |

|       |                                                                                                                     |    |      |          |                                                                                                |     |     |       |          |          |          |          |
|-------|---------------------------------------------------------------------------------------------------------------------|----|------|----------|------------------------------------------------------------------------------------------------|-----|-----|-------|----------|----------|----------|----------|
| GO_BP | GO:0048260~positive regulation of receptor-mediated endocytosis                                                     | 4  | 0.55 | 0.041376 | HIP1, SGIP1, LDLRAP1, SYNE1                                                                    | 642 | 22  | 18082 | 5.120929 | 1        | 0.666207 | 0.66005  |
| GO_BP | GO:0030512~negative regulation of transforming growth factor beta receptor signaling pathway                        | 6  | 0.83 | 0.041903 | TGFBR3, BAMBI, HTRA1, PMEPA1, SMAD6, VASN                                                      | 642 | 54  | 18082 | 3.129457 | 1        | 0.670693 | 0.664494 |
| GO_MF | GO:0005520~insulin-like growth factor binding                                                                       | 4  | 0.55 | 0.044261 | IGFBP2, HTRA1, CRIM1, CYR61                                                                    | 608 | 23  | 17446 | 4.990275 | 1        | 0.509712 | 0.496862 |
| GO_MF | GO:0017075~syntaxin-1 binding                                                                                       | 4  | 0.55 | 0.044261 | NSF, UNC13B, STXBP1, VAMP2                                                                     | 608 | 23  | 17446 | 4.990275 | 1        | 0.509712 | 0.496862 |
| GO_BP | GO:0043491~protein kinase B signaling                                                                               | 5  | 0.69 | 0.044592 | LINGO1, AXL, TYRO3, MERTK, EPHA2                                                               | 642 | 38  | 18082 | 3.705935 | 1        | 0.70218  | 0.69569  |
| GO_BP | GO:0001656~metanephros development                                                                                  | 5  | 0.69 | 0.044592 | ROBO2, FOXC2, GDNF, WT1, WNT4                                                                  | 642 | 38  | 18082 | 3.705935 | 1        | 0.70218  | 0.69569  |
| GO_BP | GO:0043434~response to peptide hormone                                                                              | 7  | 0.97 | 0.044649 | BTG2, PRKCI, SPARC, ANXA1, STAT1, DAG1, PLD1                                                   | 642 | 73  | 18082 | 2.700764 | 1        | 0.70218  | 0.69569  |
| GO_BP | GO:0009952~anterior/posterior pattern specification                                                                 | 9  | 1.24 | 0.045693 | BTG2, SMO, ALDH1A2, HOXC5, HOXC4, HOXC8, HOXC6, CDON, BMPR1A                                   | 642 | 112 | 18082 | 2.263268 | 1        | 0.702612 | 0.696118 |
| GO_BP | GO:0014850~response to muscle activity                                                                              | 4  | 0.55 | 0.046368 | FNDC5, ITGA2, METRNL, TNS2                                                                     | 642 | 23  | 18082 | 4.89828  | 1        | 0.702612 | 0.696118 |
| GO_BP | GO:0001708~cell fate specification                                                                                  | 4  | 0.55 | 0.046368 | ITGB1, TEAD4, SMO, CDON                                                                        | 642 | 23  | 18082 | 4.89828  | 1        | 0.702612 | 0.696118 |
| GO_BP | GO:0090190~positive regulation of branching involved in ureteric bud morphogenesis                                  | 4  | 0.55 | 0.046368 | SMO, GDNF, SOX8, VEGFA                                                                         | 642 | 23  | 18082 | 4.89828  | 1        | 0.702612 | 0.696118 |
| GO_BP | GO:0048041~focal adhesion assembly                                                                                  | 4  | 0.55 | 0.046368 | DLC1, ITGA2, ACTN1, AJUBA                                                                      | 642 | 23  | 18082 | 4.89828  | 1        | 0.702612 | 0.696118 |
| GO_BP | GO:0035767~endothelial cell chemotaxis                                                                              | 3  | 0.41 | 0.046754 | NR4A1, RAB13, VEGFA                                                                            | 642 | 10  | 18082 | 8.449533 | 1        | 0.702612 | 0.696118 |
| GO_BP | GO:0046620~regulation of organ growth                                                                               | 3  | 0.41 | 0.046754 | FOXC2, FOXC1, LATS2                                                                            | 642 | 10  | 18082 | 8.449533 | 1        | 0.702612 | 0.696118 |
| GO_BP | GO:0042698~ovulation cycle                                                                                          | 3  | 0.41 | 0.046754 | GABRB1, AXL, TYRO3                                                                             | 642 | 10  | 18082 | 8.449533 | 1        | 0.702612 | 0.696118 |
| GO_BP | GO:0001649~osteoblast differentiation                                                                               | 9  | 1.24 | 0.047721 | TGFBR3, MRC2, SMO, TMSB4X, CREB3L1, RRAS2, SOX8, CYR61, EPHA2                                  | 642 | 113 | 18082 | 2.243239 | 1        | 0.70691  | 0.700377 |
| GO_BP | GO:0060348~bone development                                                                                         | 6  | 0.83 | 0.047824 | PTGER4, SPARC, P3H1, RARB, SULF1, FGFR2                                                        | 642 | 56  | 18082 | 3.01769  | 1        | 0.70691  | 0.700377 |
| GO_BP | GO:0031100~organ regeneration                                                                                       | 6  | 0.83 | 0.047824 | TGFBR3, NR4A3, ANXA3, AXL, LIF, ADM                                                            | 642 | 56  | 18082 | 3.01769  | 1        | 0.70691  | 0.700377 |
| KEGG  | mmu04923:Regulation of lipolysis in adipocytes                                                                      | 6  | 0.83 | 0.048225 | NPR1, PDE3B, ADCY1, PRKG1, TSHB, ADCY5                                                         | 270 | 57  | 7691  | 2.998441 | 0.999954 | 0.312913 | 0.283625 |
| GO_BP | GO:0030168~platelet activation                                                                                      | 5  | 0.69 | 0.048349 | AXL, SRF, F2R, TYRO3, MERTK                                                                    | 642 | 39  | 18082 | 3.610911 | 1        | 0.708241 | 0.701695 |
| GO_BP | GO:0051260~protein homooligomerization                                                                              | 13 | 1.79 | 0.048438 | GSDMD, KCNF1, KCNG2, SPTBN5, ITPR3, C1QTNF1, EHD4, C1QTNF7, KCTD11, MICU1, CRYAB, OPTN, KCTD15 | 642 | 197 | 18082 | 1.858611 | 1        | 0.708241 | 0.701695 |
| GO_MF | GO:0000982~transcription factor activity, RNA polymerase II core promoter proximal region sequence-specific binding | 4  | 0.55 | 0.049318 | JUN, ARNTL, FOSL2, DDN                                                                         | 608 | 24  | 17446 | 4.782346 | 1        | 0.542654 | 0.528974 |
| GO_MF | GO:0003785~actin monomer binding                                                                                    | 4  | 0.55 | 0.049318 | TMSB4X, MYL3, TMSB10, PKNOX2                                                                   | 608 | 24  | 17446 | 4.782346 | 1        | 0.542654 | 0.528974 |
| KEGG  | mmu04610:Complement and coagulation cascades                                                                        | 7  | 0.97 | 0.049326 | C1RA, CD59B, CD59A, PROS1, F2R, PLAT, CD55                                                     | 270 | 76  | 7691  | 2.623635 | 0.999963 | 0.312913 | 0.283625 |
| GO_MF | GO:0008138~protein tyrosine/serine/threonine phosphatase activity                                                   | 5  | 0.69 | 0.049401 | DUSP10, DUSP3, DUSP15, DUSP8, CDC14A                                                           | 608 | 40  | 17446 | 3.58676  | 1        | 0.542654 | 0.528974 |
| GO_BP | GO:0045987~positive regulation of smooth muscle contraction                                                         | 4  | 0.55 | 0.051642 | SRF, ITGA2, F2R, NPNT                                                                          | 642 | 24  | 18082 | 4.694185 | 1        | 0.740216 | 0.733375 |
| GO_BP | GO:0030866~cortical actin cytoskeleton organization                                                                 | 4  | 0.55 | 0.051642 | EHD2, FMNL2, RAB13, ARF6                                                                       | 642 | 24  | 18082 | 4.694185 | 1        | 0.740216 | 0.733375 |
| GO_BP | GO:0009987~cellular process                                                                                         | 4  | 0.55 | 0.051642 | GNAO1, JUN, MAP1B, RRAS2                                                                       | 642 | 24  | 18082 | 4.694185 | 1        | 0.740216 | 0.733375 |
| KEGG  | mmu04970:Salivary secretion                                                                                         | 7  | 0.97 | 0.051999 | ITPR3, ADCY1, ATP1B2, CALM2, PRKG1, VAMP2, ADCY5                                               | 270 | 77  | 7691  | 2.589562 | 0.999979 | 0.319871 | 0.289932 |
| GO_BP | GO:0001569~patterning of blood vessels                                                                              | 5  | 0.69 | 0.052276 | SEMA5A, FOXC2, SRF, SEMA3E, VEGFA                                                              | 642 | 40  | 18082 | 3.520639 | 1        | 0.740216 | 0.733375 |
| GO_BP | GO:0045773~positive regulation of axon extension                                                                    | 5  | 0.69 | 0.052276 | PAK1, TNFRSF12A, SRF, MAP1B, MAPT                                                              | 642 | 40  | 18082 | 3.520639 | 1        | 0.740216 | 0.733375 |
| GO_BP | GO:0006486~protein glycosylation                                                                                    | 9  | 1.24 | 0.054153 | ST6GAL1, EXTL1, B3GALT2, ST3GAL6, ST6GALNAC3, ST3GAL1, GALNT10, ST6GALNAC6, ST3GAL3            | 642 | 116 | 18082 | 2.185224 | 1        | 0.740216 | 0.733375 |
| GO_BP | GO:0050885~neuromuscular process controlling balance                                                                | 6  | 0.83 | 0.054216 | ABR, CLIC5, FOXS1, RBFOX2, NR4A3, ADCY5                                                        | 642 | 58  | 18082 | 2.913632 | 1        | 0.740216 | 0.733375 |
| GO_MF | GO:0005086~ARF guanyl-nucleotide exchange factor activity                                                           | 4  | 0.55 | 0.054644 | PSD3, NCK2, AMPH, ARFGEF3                                                                      | 608 | 25  | 17446 | 4.591053 | 1        | 0.59115  | 0.576247 |
| KEGG  | mmu04915:Estrogen signaling pathway                                                                                 | 8  | 1.10 | 0.05533  | GNAO1, JUN, CREB3L1, ITPR3, ADCY1, FOS, CALM2, ADCY5                                           | 270 | 98  | 7691  | 2.325321 | 0.99999  | 0.330352 | 0.299432 |
| GO_BP | GO:0060395~SMAD protein signal transduction                                                                         | 7  | 0.97 | 0.055377 | JUN, ATOH8, MAGI2, INHBB, VIM, FOS, GDF5                                                       | 642 | 77  | 18082 | 2.560464 | 1        | 0.740216 | 0.733375 |
| GO_BP | GO:0035413~positive regulation of catenin import into nucleus                                                       | 3  | 0.41 | 0.05583  | SEMA5A, KANK1, BAMBI                                                                           | 642 | 11  | 18082 | 7.681393 | 1        | 0.740216 | 0.733375 |
| GO_BP | GO:0043589~skin morphogenesis                                                                                       | 3  | 0.41 | 0.05583  | COL1A2, SRF, ITGA2                                                                             | 642 | 11  | 18082 | 7.681393 | 1        | 0.740216 | 0.733375 |
| GO_BP | GO:0000904~cell morphogenesis involved in differentiation                                                           | 3  | 0.41 | 0.05583  | EPB41L5, LAMB2, MYH9                                                                           | 642 | 11  | 18082 | 7.681393 | 1        | 0.740216 | 0.733375 |

|       |                                                                             |    |       |          |                                                                                                                                                                                                                                                                                                                                                                                                                                                                                                                                                                         |     |      |       |          |          |          |          |
|-------|-----------------------------------------------------------------------------|----|-------|----------|-------------------------------------------------------------------------------------------------------------------------------------------------------------------------------------------------------------------------------------------------------------------------------------------------------------------------------------------------------------------------------------------------------------------------------------------------------------------------------------------------------------------------------------------------------------------------|-----|------|-------|----------|----------|----------|----------|
| GO_BP | GO:0060068~vagina development                                               | 3  | 0.41  | 0.05583  | AXL, TYRO3, MERTK                                                                                                                                                                                                                                                                                                                                                                                                                                                                                                                                                       | 642 | 11   | 18082 | 7.681393 | 1        | 0.740216 | 0.733375 |
| GO_BP | GO:0048762~mesenchymal cell differentiation                                 | 3  | 0.41  | 0.05583  | FOXC1, FGFR2, FGFR1                                                                                                                                                                                                                                                                                                                                                                                                                                                                                                                                                     | 642 | 11   | 18082 | 7.681393 | 1        | 0.740216 | 0.733375 |
| GO_BP | GO:0060484~lung-associated mesenchyme development                           | 3  | 0.41  | 0.05583  | PTK7, FGFR2, FGFR1                                                                                                                                                                                                                                                                                                                                                                                                                                                                                                                                                      | 642 | 11   | 18082 | 7.681393 | 1        | 0.740216 | 0.733375 |
| GO_BP | GO:0048339~paraxial mesoderm development                                    | 3  | 0.41  | 0.05583  | EPB41L5, FGFR1, BMPR1A                                                                                                                                                                                                                                                                                                                                                                                                                                                                                                                                                  | 642 | 11   | 18082 | 7.681393 | 1        | 0.740216 | 0.733375 |
| GO_BP | GO:2000772~regulation of cellular senescence                                | 3  | 0.41  | 0.05583  | VASH1, BMPR1A, ARNTL                                                                                                                                                                                                                                                                                                                                                                                                                                                                                                                                                    | 642 | 11   | 18082 | 7.681393 | 1        | 0.740216 | 0.733375 |
| GO_BP | GO:0007017~microtubule-based process                                        | 5  | 0.69  | 0.056371 | TUBB2B, TUBB2A, TUBA1A, MAP1B, KIF5B                                                                                                                                                                                                                                                                                                                                                                                                                                                                                                                                    | 642 | 41   | 18082 | 3.434769 | 1        | 0.740216 | 0.733375 |
| GO_BP | GO:0031397~negative regulation of protein ubiquitination                    | 5  | 0.69  | 0.056371 | NXN, PELI3, CRY1, FYN, ARRB1                                                                                                                                                                                                                                                                                                                                                                                                                                                                                                                                            | 642 | 41   | 18082 | 3.434769 | 1        | 0.740216 | 0.733375 |
| GO_MF | GO:0001948~glycoprotein binding                                             | 7  | 0.97  | 0.056967 | ITGB1, ITGA3, TGFA, FYN, VIM, FGFR1, BMPR1A                                                                                                                                                                                                                                                                                                                                                                                                                                                                                                                             | 608 | 79   | 17446 | 2.542513 | 1        | 0.597306 | 0.582248 |
| GO_BP | GO:0032456~endocytic recycling                                              | 4  | 0.55  | 0.057192 | ARL4C, EHD2, EHD4, RAB13                                                                                                                                                                                                                                                                                                                                                                                                                                                                                                                                                | 642 | 25   | 18082 | 4.506417 | 1        | 0.740216 | 0.733375 |
| GO_BP | GO:0007585~respiratory gaseous exchange                                     | 4  | 0.55  | 0.057192 | MAFB, DACH1, MAN1A2, NDN                                                                                                                                                                                                                                                                                                                                                                                                                                                                                                                                                | 642 | 25   | 18082 | 4.506417 | 1        | 0.740216 | 0.733375 |
| GO_BP | GO:0003382~epithelial cell morphogenesis                                    | 4  | 0.55  | 0.057192 | EPB41L5, HRH2, PALLD, FAT1                                                                                                                                                                                                                                                                                                                                                                                                                                                                                                                                              | 642 | 25   | 18082 | 4.506417 | 1        | 0.740216 | 0.733375 |
| GO_BP | GO:0043001~Golgi to plasma membrane protein transport                       | 4  | 0.55  | 0.057192 | NSF, VAMP4, OPTN, VAMP2                                                                                                                                                                                                                                                                                                                                                                                                                                                                                                                                                 | 642 | 25   | 18082 | 4.506417 | 1        | 0.740216 | 0.733375 |
| GO_BP | GO:0048010~vascular endothelial growth factor receptor signaling pathway    | 4  | 0.55  | 0.057192 | FOXC2, FOXC1, SULF1, VEGFA                                                                                                                                                                                                                                                                                                                                                                                                                                                                                                                                              | 642 | 25   | 18082 | 4.506417 | 1        | 0.740216 | 0.733375 |
| GO_BP | GO:0048593~camera-type eye morphogenesis                                    | 4  | 0.55  | 0.057192 | TENM3, FAT1, EPHB1, VEGFA                                                                                                                                                                                                                                                                                                                                                                                                                                                                                                                                               | 642 | 25   | 18082 | 4.506417 | 1        | 0.740216 | 0.733375 |
| GO_MF | GO:0019838~growth factor binding                                            | 5  | 0.69  | 0.057355 | FGFBP1, IGFBP2, HTRA1, CYR61, VEGFA                                                                                                                                                                                                                                                                                                                                                                                                                                                                                                                                     | 608 | 42   | 17446 | 3.415962 | 1        | 0.597306 | 0.582248 |
| KEGG  | mmu05410:Hypertrophic cardiomyopathy (HCM)                                  | 7  | 0.97  | 0.057605 | ITGB1, ITGB5, ITGA3, ITGA2, TPM1, MYL3, DAG1                                                                                                                                                                                                                                                                                                                                                                                                                                                                                                                            | 270 | 79   | 7691  | 2.524004 | 0.999994 | 0.334107 | 0.302836 |
| GO_MF | GO:0044325~ion channel binding                                              | 9  | 1.24  | 0.058244 | ACTN1, PDE4B, FYN, ARRB1, ACTN4, CALM2, VAMP2, CBARP, PPP1R9B                                                                                                                                                                                                                                                                                                                                                                                                                                                                                                           | 608 | 120  | 17446 | 2.152056 | 1        | 0.597306 | 0.582248 |
| GO_BP | GO:0060326~cell chemotaxis                                                  | 7  | 0.97  | 0.058282 | SEMA5A, DOCK4, ARHGEF16, ELMO2, EPHB1, VEGFA, EPHA2                                                                                                                                                                                                                                                                                                                                                                                                                                                                                                                     | 642 | 78   | 18082 | 2.527638 | 1        | 0.743646 | 0.736773 |
| GO_BP | GO:0071260~cellular response to mechanical stimulus                         | 7  | 0.97  | 0.058282 | PTGER4, GADD45A, ITGA2, DAG1, ANKRD1, SCX, TLR7                                                                                                                                                                                                                                                                                                                                                                                                                                                                                                                         | 642 | 78   | 18082 | 2.527638 | 1        | 0.743646 | 0.736773 |
| GO_BP | GO:0009749~response to glucose                                              | 7  | 0.97  | 0.058282 | GLP1R, NCF2, COL4A3, ENSA, ILDR2, MAFA, VAMP2                                                                                                                                                                                                                                                                                                                                                                                                                                                                                                                           | 642 | 78   | 18082 | 2.527638 | 1        | 0.743646 | 0.736773 |
| GO_MF | GO:0019905~syntaxin binding                                                 | 7  | 0.97  | 0.059865 | NSF, UNC13B, TXLNB, STXBP1, SYT9, VAMP2, SYT17                                                                                                                                                                                                                                                                                                                                                                                                                                                                                                                          | 608 | 80   | 17446 | 2.510732 | 1        | 0.597306 | 0.582248 |
| GO_MF | GO:0030552~cAMP binding                                                     | 4  | 0.55  | 0.060233 | PDE10A, PDE3B, PDE4B, PDE3A                                                                                                                                                                                                                                                                                                                                                                                                                                                                                                                                             | 608 | 26   | 17446 | 4.414474 | 1        | 0.597306 | 0.582248 |
| GO_MF | GO:0043425~bHLH transcription factor binding                                | 4  | 0.55  | 0.060233 | BHLHE41, SCX, TCF21, ARNTL                                                                                                                                                                                                                                                                                                                                                                                                                                                                                                                                              | 608 | 26   | 17446 | 4.414474 | 1        | 0.597306 | 0.582248 |
| GO_BP | GO:0007162~negative regulation of cell adhesion                             | 5  | 0.69  | 0.060633 | SEMA5A, PODXL, PDE3B, PLXNB1, AGER                                                                                                                                                                                                                                                                                                                                                                                                                                                                                                                                      | 642 | 42   | 18082 | 3.352989 | 1        | 0.767886 | 0.760789 |
| GO_BP | GO:0045892~negative regulation of transcription, DNA-templated              | 29 | 4.00  | 0.06075  | ZFP423, NAB1, NAB2, BHLHE41, SCX, LOXL2, ARNTL, RELB, FOXS1, DACH1, ATOH8, E2F1, HIVEP1, SMYD1, SOX8, SOX5, WNT4, JUN, RBFOX2, FOXD1, PRMT2, ATP8B1, CBFA2T3, SMO, MDFIC, WT1, CRY1, NFKBIE, ATF3                                                                                                                                                                                                                                                                                                                                                                       | 642 | 579  | 18082 | 1.410688 | 1        | 0.767886 | 0.760789 |
| GO_BP | GO:0007030~Golgi organization                                               | 7  | 0.97  | 0.061276 | RAB30, SPTBN5, ATP8B2, ATP8B1, OPTN, TJAP1, SYNE1                                                                                                                                                                                                                                                                                                                                                                                                                                                                                                                       | 642 | 79   | 18082 | 2.495643 | 1        | 0.770941 | 0.763816 |
| GO_BP | GO:0022604~regulation of cell morphogenesis                                 | 4  | 0.55  | 0.063012 | FMNL2, SPARC, AGO4, WTIP                                                                                                                                                                                                                                                                                                                                                                                                                                                                                                                                                | 642 | 26   | 18082 | 4.333094 | 1        | 0.78005  | 0.772841 |
| GO_BP | GO:0048843~negative regulation of axon extension involved in axon guidance  | 4  | 0.55  | 0.063012 | SEMA5A, SEMA6C, SEMA3G, SEMA3E                                                                                                                                                                                                                                                                                                                                                                                                                                                                                                                                          | 642 | 26   | 18082 | 4.333094 | 1        | 0.78005  | 0.772841 |
| GO_BP | GO:0001934~positive regulation of protein phosphorylation                   | 12 | 1.66  | 0.063598 | PTGER4, PAK1, ANXA2, MPRIP, MOB2, IL34, ARRB1, RSP01, AGER, CYR61, CDON, VEGFA                                                                                                                                                                                                                                                                                                                                                                                                                                                                                          | 642 | 184  | 18082 | 1.836855 | 1        | 0.78005  | 0.772841 |
| GO_BP | GO:0006351~transcription, DNA-templated                                     | 80 | 11.03 | 0.063953 | BTG2, ZFP521, HIP1, CRTCL1, NAB1, NAB2, RASL11A, SETD7, BHLHE41, TCF21, SCX, ARRB1, ABRA, LOXL2, DACH1, CREB3L1, SOX8, LRRFIP1, ZFP37, SOX5, TEAD4, FOXD2, FOXD1, ARID5A, FOXL1, CBFA2T3, MDFIC, ELF4, CRY1, RARB, VOPP1, LMX1B, NUPR1, AJUBA, ATF3, VGLL3, KANK2, ZFP667, FOXC2, FOXC1, ZBTB8A, ZFP423, CASZ1, ZBTB46, SRF, ZBTB42, AEBP1, MED12L, NPAS2, ARNTL, RELB, FOXS1, ABLIM3, GBX1, ATOH8, HIVEP1, HOXC5, E2F1, SMYD1, HOXC4, NDN, HIVEP2, HOXC8, HOXC6, JUN, STAT1, EYA4, PBX2, WTIP, MAFA, SMAD6, PTPN14, FOSL2, NR4A2, NR4A1, MAFB, NR4A3, WT1, MAFK, LPIN2 | 642 | 1885 | 18082 | 1.195336 | 1        | 0.78005  | 0.772841 |
| GO_MF | GO:0044212~transcription regulatory region DNA binding                      | 14 | 1.93  | 0.064548 | FOXC2, FOXC1, JUN, ARID5A, ARRB1, FOS, SMAD6, FOSL2, WT1, CREB3L1, E2F1, HIVEP2, ATF3, SOX5                                                                                                                                                                                                                                                                                                                                                                                                                                                                             | 608 | 233  | 17446 | 1.724108 | 1        | 0.631335 | 0.615419 |
| GO_BP | GO:0007169~transmembrane receptor protein tyrosine kinase signaling pathway | 8  | 1.10  | 0.064751 | DOK1, EPHA6, GDNF, NTRK3, FYN, EPHB1, PAG1, EPHA2                                                                                                                                                                                                                                                                                                                                                                                                                                                                                                                       | 642 | 100  | 18082 | 2.253209 | 1        | 0.78005  | 0.772841 |
| GO_BP | GO:0090002~establishment of protein localization to plasma membrane         | 5  | 0.69  | 0.065062 | TSPAN15, TSPAN17, RAB13, MPP5, WNT4                                                                                                                                                                                                                                                                                                                                                                                                                                                                                                                                     | 642 | 43   | 18082 | 3.275013 | 1        | 0.78005  | 0.772841 |
| GO_BP | GO:0050927~positive regulation of positive chemotaxis                       | 3  | 0.41  | 0.065461 | NTRK3, ITGA2, VEGFA                                                                                                                                                                                                                                                                                                                                                                                                                                                                                                                                                     | 642 | 12   | 18082 | 7.041277 | 1        | 0.78005  | 0.772841 |
| GO_BP | GO:0001818~negative regulation of cytokine production                       | 3  | 0.41  | 0.065461 | AXL, MERTK, EPHA2                                                                                                                                                                                                                                                                                                                                                                                                                                                                                                                                                       | 642 | 12   | 18082 | 7.041277 | 1        | 0.78005  | 0.772841 |

|       |                                                                                                             |    |      |          |                                                                                                                       |     |     |       |          |   |          |          |
|-------|-------------------------------------------------------------------------------------------------------------|----|------|----------|-----------------------------------------------------------------------------------------------------------------------|-----|-----|-------|----------|---|----------|----------|
| GO_BP | GO:0042989~sequestering of actin monomers                                                                   | 3  | 0.41 | 0.065461 | GSN, TMSB4X, TMSB10                                                                                                   | 642 | 12  | 18082 | 7.041277 | 1 | 0.78005  | 0.772841 |
| GO_BP | GO:0002011~morphogenesis of an epithelial sheet                                                             | 3  | 0.41 | 0.065461 | SRF, DAG1, MPP5                                                                                                       | 642 | 12  | 18082 | 7.041277 | 1 | 0.78005  | 0.772841 |
| GO_BP | GO:0043116~negative regulation of vascular permeability                                                     | 3  | 0.41 | 0.065461 | TJP1, PDE3A, ADM                                                                                                      | 642 | 12  | 18082 | 7.041277 | 1 | 0.78005  | 0.772841 |
| GO_BP | GO:0021953~central nervous system neuron differentiation                                                    | 3  | 0.41 | 0.065461 | NR4A2, SMO, SOX5                                                                                                      | 642 | 12  | 18082 | 7.041277 | 1 | 0.78005  | 0.772841 |
| GO_MF | GO:0043548~phosphatidylinositol 3-kinase binding                                                            | 4  | 0.55 | 0.066077 | AXL, TYRO3, FYN, CALM2                                                                                                | 608 | 27  | 17446 | 4.250975 | 1 | 0.637551 | 0.621478 |
| GO_MF | GO:0033549~MAP kinase phosphatase activity                                                                  | 2  | 0.28 | 0.068378 | DUSP10, DUSP3                                                                                                         | 608 | 2   | 17446 | 28.69408 | 1 | 0.642389 | 0.626194 |
| GO_MF | GO:0004119~cGMP-inhibited cyclic-nucleotide phosphodiesterase activity                                      | 2  | 0.28 | 0.068378 | PDE3B, PDE3A                                                                                                          | 608 | 2   | 17446 | 28.69408 | 1 | 0.642389 | 0.626194 |
| GO_BP | GO:0006931~substrate-dependent cell migration, cell attachment to substrate                                 | 2  | 0.28 | 0.069644 | EPB41L5, TNFRSF12A                                                                                                    | 642 | 2   | 18082 | 28.16511 | 1 | 0.78834  | 0.781054 |
| GO_BP | GO:0001971~negative regulation of activation of membrane attack complex                                     | 2  | 0.28 | 0.069644 | CD59B, CD59A                                                                                                          | 642 | 2   | 18082 | 28.16511 | 1 | 0.78834  | 0.781054 |
| GO_BP | GO:0006677~glycosylceramide metabolic process                                                               | 2  | 0.28 | 0.069644 | ST6GALNAC3, ST6GALNAC6                                                                                                | 642 | 2   | 18082 | 28.16511 | 1 | 0.78834  | 0.781054 |
| GO_BP | GO:0048378~regulation of lateral mesodermal cell fate specification                                         | 2  | 0.28 | 0.069644 | FGFR1, BMPR1A                                                                                                         | 642 | 2   | 18082 | 28.16511 | 1 | 0.78834  | 0.781054 |
| GO_BP | GO:1902257~negative regulation of apoptotic process involved in outflow tract morphogenesis                 | 2  | 0.28 | 0.069644 | FOXC2, FOXC1                                                                                                          | 642 | 2   | 18082 | 28.16511 | 1 | 0.78834  | 0.781054 |
| GO_BP | GO:1903923~positive regulation of protein processing in phagocytic vesicle                                  | 2  | 0.28 | 0.069644 | GSN, MYH9                                                                                                             | 642 | 2   | 18082 | 28.16511 | 1 | 0.78834  | 0.781054 |
| GO_BP | GO:0035607~fibroblast growth factor receptor signaling pathway involved in orbitofrontal cortex development | 2  | 0.28 | 0.069644 | FGFR2, FGFR1                                                                                                          | 642 | 2   | 18082 | 28.16511 | 1 | 0.78834  | 0.781054 |
| GO_BP | GO:0072249~metanephric glomerular visceral epithelial cell development                                      | 2  | 0.28 | 0.069644 | NPHS2, LAMB2                                                                                                          | 642 | 2   | 18082 | 28.16511 | 1 | 0.78834  | 0.781054 |
| GO_BP | GO:0035617~stress granule disassembly                                                                       | 2  | 0.28 | 0.069644 | KIF5B, KLC1                                                                                                           | 642 | 2   | 18082 | 28.16511 | 1 | 0.78834  | 0.781054 |
| GO_BP | GO:0001941~postsynaptic membrane organization                                                               | 2  | 0.28 | 0.069644 | CHRN1, GDNF                                                                                                           | 642 | 2   | 18082 | 28.16511 | 1 | 0.78834  | 0.781054 |
| GO_BP | GO:0048706~embryonic skeletal system development                                                            | 5  | 0.69 | 0.069654 | HOXC5, SCX, GAS1, SULF1, HOXC6                                                                                        | 642 | 44  | 18082 | 3.200581 | 1 | 0.78834  | 0.781054 |
| GO_BP | GO:0051496~positive regulation of stress fiber assembly                                                     | 5  | 0.69 | 0.069654 | ARHGEF10, PAK1, SDC4, TPM1, WNT4                                                                                      | 642 | 44  | 18082 | 3.200581 | 1 | 0.78834  | 0.781054 |
| GO_MF | GO:0000149~SNARE binding                                                                                    | 6  | 0.83 | 0.071577 | STXBP1, TNFAIP2, VAMP4, SYT9, STX11, VAMP2                                                                            | 608 | 64  | 17446 | 2.69007  | 1 | 0.644941 | 0.628682 |
| KEGG  | mmu05140:Leishmaniasis                                                                                      | 6  | 0.83 | 0.072388 | ITGB1, JUN, NCF2, IFNGR1, STAT1, FOS                                                                                  | 270 | 64  | 7691  | 2.670486 | 1 | 0.408185 | 0.369981 |
| GO_MF | GO:0008191~metalloendopeptidase inhibitor activity                                                          | 3  | 0.41 | 0.073166 | WFIKK2, TIMP2, RECK                                                                                                   | 608 | 13  | 17446 | 6.621711 | 1 | 0.644941 | 0.628682 |
| GO_MF | GO:0004115~3',5'-cyclic-AMP phosphodiesterase activity                                                      | 3  | 0.41 | 0.073166 | PDE3B, PDE4B, PDE3A                                                                                                   | 608 | 13  | 17446 | 6.621711 | 1 | 0.644941 | 0.628682 |
| GO_MF | GO:0030898~actin-dependent ATPase activity                                                                  | 3  | 0.41 | 0.073166 | MYO1D, MYL6, MYH9                                                                                                     | 608 | 13  | 17446 | 6.621711 | 1 | 0.644941 | 0.628682 |
| GO_MF | GO:0030881~beta-2-microglobulin binding                                                                     | 3  | 0.41 | 0.073166 | H2-Q6, H2-Q7, H2-Q4                                                                                                   | 608 | 13  | 17446 | 6.621711 | 1 | 0.644941 | 0.628682 |
| GO_BP | GO:0030324~lung development                                                                                 | 9  | 1.24 | 0.073913 | SPARC, ITGA3, ALDH1A2, LIF, AARD, FGFR2, VEGFA, FGFR1, BMPR1A                                                         | 642 | 124 | 18082 | 2.044242 | 1 | 0.831241 | 0.823559 |
| GO_BP | GO:0006911~phagocytosis, engulfment                                                                         | 5  | 0.69 | 0.074408 | GSN, ELMO1, SIRPA, MYH9, GULP1                                                                                        | 642 | 45  | 18082 | 3.129457 | 1 | 0.831241 | 0.823559 |
| GO_BP | GO:0045765~regulation of angiogenesis                                                                       | 4  | 0.55 | 0.07543  | TNFRSF12A, EMP2, VASH1, EPHA2                                                                                         | 642 | 28  | 18082 | 4.023587 | 1 | 0.831241 | 0.823559 |
| GO_BP | GO:0043117~positive regulation of vascular permeability                                                     | 3  | 0.41 | 0.075595 | PDE3A, IL18, VEGFA                                                                                                    | 642 | 13  | 18082 | 6.499641 | 1 | 0.831241 | 0.823559 |
| GO_BP | GO:0008406~gonad development                                                                                | 3  | 0.41 | 0.075595 | SERPINB6A, SERPINB6B, WT1                                                                                             | 642 | 13  | 18082 | 6.499641 | 1 | 0.831241 | 0.823559 |
| GO_BP | GO:0001946~lymphangiogenesis                                                                                | 3  | 0.41 | 0.075595 | FOXC2, PTPN14, VEGFA                                                                                                  | 642 | 13  | 18082 | 6.499641 | 1 | 0.831241 | 0.823559 |
| GO_BP | GO:0040037~negative regulation of fibroblast growth factor receptor signaling pathway                       | 3  | 0.41 | 0.075595 | GPC1, SULF1, WNT4                                                                                                     | 642 | 13  | 18082 | 6.499641 | 1 | 0.831241 | 0.823559 |
| GO_BP | GO:0007010~cytoskeleton organization                                                                        | 8  | 1.10 | 0.076413 | FMNL2, ABLIM3, DLC1, DPYSL2, ELMO2, SIRPA, WTIP, AJUBA                                                                | 642 | 104 | 18082 | 2.166547 | 1 | 0.836834 | 0.8291   |
| GO_MF | GO:0000978~RNA polymerase II core promoter proximal region sequence-specific DNA binding                    | 19 | 2.62 | 0.077636 | TEAD4, JUN, FOXD1, STAT1, SRF, BHLHE41, FOS, MAFA, SMAD6, FOSL2, DDN, RELB, NR4A2, NR4A3, MAFB, ELF4, NDN, FOSB, ATF3 | 608 | 359 | 17446 | 1.518628 | 1 | 0.675999 | 0.658957 |



|       |                                               |    |      |          |                                                                          |     |     |       |          |   |          |          |
|-------|-----------------------------------------------|----|------|----------|--------------------------------------------------------------------------|-----|-----|-------|----------|---|----------|----------|
| GO_BP | GO:0000188~inactivation of MAPK activity      | 3  | 0.41 | 0.097188 | DUSP10, DUSP3, DUSP8                                                     | 642 | 15  | 18082 | 5.633022 | 1 | 0.959468 | 0.9506   |
| GO_BP | GO:0040008~regulation of growth               | 6  | 0.83 | 0.097686 | NELL2, SOCS2, IGFBP2, NDN, NEDD9, KCTD11                                 | 642 | 69  | 18082 | 2.44914  | 1 | 0.96088  | 0.951999 |
| GO_MF | GO:0003714~transcription corepressor activity | 10 | 1.38 | 0.097771 | RBFOX2, BHLHE41, ANKRD1, SMYD1, AEBP1, WTIP, AJUBA, CBFA2T3, LOXL2, WNT4 | 608 | 157 | 17446 | 1.827648 | 1 | 0.761455 | 0.742259 |
