# Supplementary material
Source: publisher figshare collection journal article supplement (https://diabetesjournals.figshare.com/articles/dataset/_/14888034)
Supplement: Supplementary file 8 [file 1]

|                   | Category | Term                                                                                      | Count | PValue | Genes                                                                                                                                                                                                                                                                                                                                                                                                                       |
|-------------------|----------|-------------------------------------------------------------------------------------------|-------|--------|-----------------------------------------------------------------------------------------------------------------------------------------------------------------------------------------------------------------------------------------------------------------------------------------------------------------------------------------------------------------------------------------------------------------------------|
| D2-3m-up-1        | GO_BP    | GO:0051384~response to glucocorticoid                                                     | 5     | 0.008  | SPARC, ANXA3, IGFBP2, ADM, PTGDS                                                                                                                                                                                                                                                                                                                                                                                            |
| D2-3m-up-2        | GO_BP    | GO:0009611~response to wounding                                                           | 4     | 0.031  | GDNF, F2R, ADM, VASH1                                                                                                                                                                                                                                                                                                                                                                                                       |
| D2-3m-up-3        | GO_BP    | GO:0015031~protein transport                                                              | 10    | 0.034  | RAB3B, ARHGAP33, SEC16B, STXB1, S100A13, APBA1, RAB7B, STX11, VAMP2, ARF6                                                                                                                                                                                                                                                                                                                                                   |
| D2-3m-up-4        | GO_BP    | GO:0043065~positive regulation of apoptotic process                                       | 11    | 0.038  | MTCH1, ANXA1, PRMT2, TNFRSF12A, ADAMTSL4, ALDH1A2, ANKRD1, IL18, RARB, ADM, CYR61                                                                                                                                                                                                                                                                                                                                           |
| D2-3m-up-5        | GO_MF    | GO:0048306~calcium-dependent protein binding                                              | 5     | 0.062  | ANXA1, ANXA2, ANXA3, S100A11, VAMP2                                                                                                                                                                                                                                                                                                                                                                                         |
| D2-3m-up-6        | GO_BP    | GO:0002376~immune system process                                                          | 7     | 0.072  | GSDMD, C1RA, ANXA1, IFITM2, AXL, IL34, OTUD7B                                                                                                                                                                                                                                                                                                                                                                               |
| D2-3m-up-7        | KEGG     | mmu00310:Lysine degradation                                                               | 3     | 0.078  | COLGALT2, SETD7, PLOD2                                                                                                                                                                                                                                                                                                                                                                                                      |
| D2-3m-up-8        | GO_MF    | GO:0005509~calcium ion binding                                                            | 14    | 0.083  | C1RA, NECAB3, SPARC, ANXA1, ANXA2, ANXA3, ACTN1, MYL12A, AIF1L, NELL2, S100A13, EFHD2, PAMR1, S100A11                                                                                                                                                                                                                                                                                                                       |
| D2-3m-up-9        | GO_BP    | GO:0045087~innate immune response                                                         | 6     | 0.084  | GSDMD, C1RA, ANXA1, IFITM2, AXL, IL34                                                                                                                                                                                                                                                                                                                                                                                       |
| D2-3m-up-10       | GO_BP    | GO:0006954~inflammatory response                                                          | 7     | 0.096  | GSDMD, ANXA1, AXL, IL34, F2R, IL18, TSPAN2                                                                                                                                                                                                                                                                                                                                                                                  |
| D2-6m-up-1        | KEGG     | mmu04010:MAPK signaling pathway                                                           | 11    | 0.003  | JUN, GADD45B, RRAS, GADD45A, SRF, RRAS2, ARRB1, FOS, DUSP8, RELB, FGFR1                                                                                                                                                                                                                                                                                                                                                     |
| D2-6m-up-2        | KEGG     | mmu04380:Osteoclast differentiation                                                       | 8     | 0.005  | JUN, NCF2, IFNGR1, FOSB, GAB2, FOS, RELB, FOSL2                                                                                                                                                                                                                                                                                                                                                                             |
| D2-6m-up-3        | GO_BP    | GO:0006366~transcription from RNA polymerase II promoter                                  | 6     | 0.009  | JUN, SRF, FOSB, ARRB1, FOS, FOSL2                                                                                                                                                                                                                                                                                                                                                                                           |
| D2-6m-up-4        | GO_BP    | GO:0032870~cellular response to hormone stimulus                                          | 6     | 0.009  | SOCS2, JUN, NCF2, IGFBP2, FOSB, FOS                                                                                                                                                                                                                                                                                                                                                                                         |
| D2-6m-up-5        | GO_MF    | GO:0070412~R-SMAD binding                                                                 | 5     | 0.011  | JUN, ANKRD1, PMEPA1, FOS, SMAD6                                                                                                                                                                                                                                                                                                                                                                                             |
| D2-6m-up-6        | GO_BP    | GO:0007568~aging                                                                          | 8     | 0.016  | JUN, CNP, UCP2, IGFBP2, TIMP2, NCAM1, FOS, PPP1R9B                                                                                                                                                                                                                                                                                                                                                                          |
| D2-6m-up-7        | GO_BP    | GO:0006355~regulation of transcription, DNA-templated                                     | 31    | 0.017  | KANK2, BTG2, HIP1, ZBTB46, SRF, SCX, ZBTB42, ARRB1, NPAS2, ARNTL, RELB, FOXS1, HOXC5, PTRF, SAMD4, JUN, ARID5A, FOS, WTIP, SMAD6, FOSL2, MDFIC, ELF4, CRY1, FOSB, VOPP1, MAFK, NUPR1, ATF3, NFE2L1, VGLL3                                                                                                                                                                                                                   |
| D2-6m-up-8        | GO_MF    | GO:0032403~protein complex binding                                                        | 11    | 0.021  | ITGB1, RRAS, MLKL, MAP1B, NCK2, APBA1, IQGAP1, ACTN4, FGFR1, PPP1R9B, CD2AP                                                                                                                                                                                                                                                                                                                                                 |
| D2-6m-up-9        | GO_BP    | GO:0007015~actin filament organization                                                    | 7     | 0.024  | PRKCI, SRF, ACTN1, NCK2, EMP2, TMSB10, PPP1R9B                                                                                                                                                                                                                                                                                                                                                                              |
| D2-6m-up-10       | GO_MF    | GO:0001047~core promoter binding                                                          | 5     | 0.027  | GADD45A, CRY1, NPAS2, RELB, ARNTL                                                                                                                                                                                                                                                                                                                                                                                           |
| D2-6m-up-11       | GO_BP    | GO:0045944~positive regulation of transcription from RNA polymerase II promoter           | 21    | 0.031  | RNASEL, JUN, SRF, ARID5A, LIF, SCX, ARRB1, FOS, CYR61, NPAS2, FOSL2, RELB, MLLT6, ARNTL, ELF4, NCK2, FOSB, ATF3, NFE2L1, ZFP462, FGFR1                                                                                                                                                                                                                                                                                      |
| D2-6m-up-12       | KEGG     | mmu05140:Leishmaniasis                                                                    | 5     | 0.032  | ITGB1, JUN, NCF2, IFNGR1, FOS                                                                                                                                                                                                                                                                                                                                                                                               |
| D2-6m-up-13       | GO_BP    | GO:0006351~transcription, DNA-templated                                                   | 27    | 0.037  | KANK2, BTG2, HIP1, ZBTB46, SRF, SCX, ZBTB42, ARRB1, NPAS2, ARNTL, RELB, FOXS1, HOXC5, PTRF, JUN, ARID5A, WTIP, SMAD6, FOSL2, MDFIC, ELF4, CRY1, VOPP1, MAFK, NUPR1, ATF3, VGLL3                                                                                                                                                                                                                                             |
| D2-6m-up-14       | GO_BP    | GO:0045666~positive regulation of neuron differentiation                                  | 7     | 0.039  | SOCS2, ITGB1, MAP1B, TIMP2, BNIP2, NBL1, FGFR1                                                                                                                                                                                                                                                                                                                                                                              |
| D2-6m-up-15       | GO_MF    | GO:0008134~transcription factor binding                                                   | 10    | 0.043  | JUN, RFXO2, MDFIC, SRF, ARID5A, ANKRD1, CRY1, ARRB1, FOS, ARNTL                                                                                                                                                                                                                                                                                                                                                             |
| D2-6m-up-16       | GO_MF    | GO:0000978~RNA polymerase II core promoter proximal region sequence-specific DNA binding  | 9     | 0.047  | JUN, ELF4, SRF, FOSB, FOS, SMAD6, ATF3, RELB, FOSL2                                                                                                                                                                                                                                                                                                                                                                         |
| D2-6m-up-17       | GO_MF    | GO:0003690~double-stranded DNA binding                                                    | 5     | 0.052  | JUN, CRY1, FOSB, FOS, FOSL2                                                                                                                                                                                                                                                                                                                                                                                                 |
| D2-6m-up-18       | GO_MF    | GO:0019900~kinase binding                                                                 | 5     | 0.052  | ITGB1, CRY1, EMP2, VIM, PPP1R9B                                                                                                                                                                                                                                                                                                                                                                                             |
| D2-6m-up-19       | GO_MF    | GO:0005200~structural constituent of cytoskeleton                                         | 6     | 0.055  | TUBB2B, TUBB2A, TUBA1A, TPM1, VIM, SPTB                                                                                                                                                                                                                                                                                                                                                                                     |
| D2-6m-up-20       | GO_BP    | GO:0009612~response to mechanical stimulus                                                | 5     | 0.056  | BTG2, JUN, IGFBP2, FOSB, INHBB                                                                                                                                                                                                                                                                                                                                                                                              |
| D2-6m-up-21       | GO_BP    | GO:0006357~regulation of transcription from RNA polymerase II promoter                    | 8     | 0.057  | ANKRD1, FOSB, MAFK, NUPR1, FOS, ATF3, RELB, FOSL2                                                                                                                                                                                                                                                                                                                                                                           |
| D2-6m-up-22       | GO_BP    | GO:0034097~response to cytokine                                                           | 6     | 0.060  | JUN, SPARC, SRF, TIMP2, FOS, RELB                                                                                                                                                                                                                                                                                                                                                                                           |
| D2-6m-up-23       | GO_BP    | GO:0035914~skeletal muscle cell differentiation                                           | 6     | 0.060  | BTG2, ANKRD1, SCX, NUPR1, FOS, ATF3                                                                                                                                                                                                                                                                                                                                                                                         |
| D2-6m-up-24       | GO_MF    | GO:0003682~chromatin binding                                                              | 8     | 0.070  | JUN, SRF, ARID5A, NUPR1, FOS, SMAD6, RELB, FOSL2                                                                                                                                                                                                                                                                                                                                                                            |
| D2-6m-up-25       | GO_BP    | GO:0043065~positive regulation of apoptotic process                                       | 11    | 0.075  | UNC13B, ITGB1, MTCH1, JUN, GADD45B, TNFRSF12A, ADAMTSL4, GADD45A, ANKRD1, NUPR1, CYR61                                                                                                                                                                                                                                                                                                                                      |
| D2-6m-up-26       | GO_MF    | GO:0005515~protein binding                                                                | 58    | 0.077  | ITGB1, BTG2, HIP1, SPARC, NCF2, SCX, ARRB1, PPP1R9B, ADAMTS4, SH3PXD2A, EFHD2, ANKRD1, PMEPA1, DENND5A, LDLRAP1, PRKCI, RFXO2, TNFRSF12A, ACTN1, RRAS2, ACTN4, GAB2, CD2AP, MDFIC, MAP1B, CRY1, MYH9, NUPR1, UTRN, NBL1, ARF6, SRF, NREP, IQGAP1, KLC1, NKD1, NPAS2, ARNTL, RELB, NCAM1, KIF3C, MAP4, JUN, ATP8B2, MLKL, GADD45B, GADD45A, PLEKHA2, PTPN12, WTIP, SMAD6, SERPINB6A, AMOTL2, APBA1, MAFK, VIM, NFE2L1, FGFR1 |
| D2-6m-up-27       | GO_MF    | GO:0044212~transcription regulatory region DNA binding                                    | 7     | 0.077  | JUN, ARID5A, ARRB1, FOS, SMAD6, ATF3, FOSL2                                                                                                                                                                                                                                                                                                                                                                                 |
| D2-6m-up-28       | GO_MF    | GO:0005543~phospholipid binding                                                           | 7     | 0.077  | PRKCI, HIP1, PLEKHA2, MAP1B, MYOF, AGAP1, SPTB                                                                                                                                                                                                                                                                                                                                                                              |
| D2-6m-up-29       | GO_MF    | GO:0051015~actin filament binding                                                         | 9     | 0.083  | HIP1, ACTN1, TPM1, MYH9, ACTN4, UTRN, SPTB, AIF1L, PPP1R9B                                                                                                                                                                                                                                                                                                                                                                  |
| D2-6m-up-30       | GO_MF    | GO:0002020~protease binding                                                               | 5     | 0.086  | ADAMTS4, ITGB1, SERPINB6A, ADAMTSL4, TIMP2                                                                                                                                                                                                                                                                                                                                                                                  |
| D2-6m-up-31       | GO_BP    | GO:1902895~positive regulation of pri-miRNA transcription from RNA polymerase II promoter | 4     | 0.087  | JUN, SRF, FOS, SMAD6                                                                                                                                                                                                                                                                                                                                                                                                        |
| D2-6m-up-32       | GO_BP    | GO:0006469~negative regulation of protein kinase activity                                 | 4     | 0.087  | SOCS2, DBNDD2, GADD45B, GADD45A                                                                                                                                                                                                                                                                                                                                                                                             |
| D2-6m-up-33       | GO_BP    | GO:0007017~microtubule-based process                                                      | 4     | 0.087  | TUBB2B, TUBB2A, TUBA1A, MAP1B                                                                                                                                                                                                                                                                                                                                                                                               |
| D2-6m-up-34       | GO_BP    | GO:0032922~circadian regulation of gene expression                                        | 4     | 0.087  | CRY1, NPAS2, RELB, ARNTL                                                                                                                                                                                                                                                                                                                                                                                                    |
| D2-6m-up-35       | GO_BP    | GO:0051726~regulation of cell cycle                                                       | 5     | 0.092  | ITGB1, JUN, GADD45B, GADD45A, ARNTL                                                                                                                                                                                                                                                                                                                                                                                         |
| D2-6m-up-36       | KEGG     | mmu04668:TNF signaling pathway                                                            | 4     | 0.093  | JUN, MLKL, LIF, FOS                                                                                                                                                                                                                                                                                                                                                                                                         |
| D2-6m-up-37       | GO_MF    | GO:0003779~actin binding                                                                  | 13    | 0.096  | ITGB1, HIP1, ACTN1, TPM1, ACTN4, SPTB, AIF1L, PPP1R9B, MPRIP, DAAM2, MAP1B, MYH9, UTRN                                                                                                                                                                                                                                                                                                                                      |
| D2-6m-up-38       | KEGG     | mmu05168:Herpes simplex infection                                                         | 5     | 0.100  | JUN, RNASEL, IFNGR1, FOS, ARNTL                                                                                                                                                                                                                                                                                                                                                                                             |
| D2-6m-up-39       | KEGG     | mmu05132:Salmonella infection                                                             | 5     | 0.100  | JUN, IFNGR1, FOS, KLC1, RAB7B                                                                                                                                                                                                                                                                                                                                                                                               |
| D2-3m6m-up-both-1 | GO_BP    | GO:0042060~wound healing                                                                  | 4     | 0.044  | SPARC, SDC4, MUSTN1, TPM1                                                                                                                                                                                                                                                                                                                                                                                                   |

|                   |       |                                                                                                       |    |       |                                                                                                                                                                                                                                                                                         |
|-------------------|-------|-------------------------------------------------------------------------------------------------------|----|-------|-----------------------------------------------------------------------------------------------------------------------------------------------------------------------------------------------------------------------------------------------------------------------------------------|
| D2-3m6m-up-both-2 | GO_BP | GO:0045765~regulation of angiogenesis                                                                 | 3  | 0.046 | TNFRSF12A, EMP2, VASH1                                                                                                                                                                                                                                                                  |
| D2-3m6m-up-both-3 | KEGG  | mmu04014:Ras signaling pathway                                                                        | 4  | 0.052 | RRAS, RRAS2, GAB2, ARF6                                                                                                                                                                                                                                                                 |
| D2-3m6m-up-both-4 | GO_BP | GO:0001558~regulation of cell growth                                                                  | 3  | 0.072 | SOCS2, IGFBP2, CYR61                                                                                                                                                                                                                                                                    |
| D2-3m6m-up-both-5 | GO_BP | GO:0045860~positive regulation of protein kinase activity                                             | 3  | 0.072 | SDC4, IQGAP1, CYR61                                                                                                                                                                                                                                                                     |
| D2-3m6m-up-both-6 | GO_MF | GO:0005525~GTP binding                                                                                | 6  | 0.089 | ARL4C, TUBA1A, RRAS, RRAS2, RAB7B, ARF6                                                                                                                                                                                                                                                 |
| D2-3m6m-up-both-7 | GO_BP | GO:0045666~positive regulation of neuron differentiation                                              | 4  | 0.095 | SOCS2, MAP1B, TIMP2, BNIP2                                                                                                                                                                                                                                                              |
| D2-3m-up-only-1   | KEGG  | mmu00310:Lysine degradation                                                                           | 3  | 0.027 | COLGALT2, SETD7, PLOD2                                                                                                                                                                                                                                                                  |
| D2-3m-up-only-2   | GO_MF | GO:0004859~phospholipase inhibitor activity                                                           | 3  | 0.036 | ANXA1, ANXA2, ANXA3                                                                                                                                                                                                                                                                     |
| D2-3m-up-only-3   | GO_MF | GO:0019834~phospholipase A2 inhibitor activity                                                        | 3  | 0.036 | ANXA1, ANXA2, ANXA3                                                                                                                                                                                                                                                                     |
| D2-3m-up-only-4   | GO_MF | GO:0048306~calcium-dependent protein binding                                                          | 4  | 0.052 | ANXA1, ANXA2, ANXA3, VAMP2                                                                                                                                                                                                                                                              |
| D2-3m-up-only-5   | GO_BP | GO:0009611~response to wounding                                                                       | 3  | 0.066 | GNDF, F2R, ADM                                                                                                                                                                                                                                                                          |
| D2-3m-up-only-6   | GO_BP | GO:0030182~neuron differentiation                                                                     | 4  | 0.072 | NR4A2, GDNF, ALDH1A2, HOXC8                                                                                                                                                                                                                                                             |
| D2-3m-up-only-7   | GO_BP | GO:0007204~positive regulation of cytosolic calcium ion concentration                                 | 4  | 0.095 | PTGER4, F2R, ADM, PRKG1                                                                                                                                                                                                                                                                 |
| D2-6m-up-only-1   | GO_BP | GO:0045944~positive regulation of transcription from RNA polymerase II promoter                       | 20 | 0.000 | RNASEL, JUN, SRF, ARID5A, LIF, SCX, ARRB1, FOS, NPAS2, FOSL2, RELB, MLLT6, ARNTL, ELF4, NCK2, FOSB, ATF3, NFE2L1, ZFP462, FGFR1                                                                                                                                                         |
| D2-6m-up-only-2   | GO_BP | GO:0006355~regulation of transcription, DNA-templated                                                 | 25 | 0.000 | BTG2, HIP1, ZBTB46, SRF, SCX, ARRB1, NPAS2, ARNTL, RELB, FOXS1, HOXC5, JUN, ARID5A, FOS, WTIP, SMAD6, FOSL2, MDFIC, ELF4, FOSB, MAFK, NUPR1, ATF3, NFE2L1, VGLL3                                                                                                                        |
| D2-6m-up-only-3   | GO_BP | GO:0006366~transcription from RNA polymerase II promoter                                              | 6  | 0.001 | JUN, SRF, FOSB, ARRB1, FOS, FOSL2                                                                                                                                                                                                                                                       |
| D2-6m-up-only-4   | GO_MF | GO:0003700~transcription factor activity, sequence-specific DNA binding                               | 15 | 0.001 | JUN, SRF, FOS, SMAD6, NPAS2, FOSL2, RELB, ARNTL, FOXS1, ELF4, HOXC5, FOSB, MAFK, ATF3, NFE2L1                                                                                                                                                                                           |
| D2-6m-up-only-5   | GO_BP | GO:0006351~transcription, DNA-templated                                                               | 22 | 0.001 | BTG2, JUN, HIP1, ZBTB46, SRF, ARID5A, SCX, ARRB1, WTIP, SMAD6, NPAS2, FOSL2, RELB, ARNTL, FOXS1, MDFIC, ELF4, HOXC5, MAFK, NUPR1, ATF3, VGLL3                                                                                                                                           |
| D2-6m-up-only-6   | GO_MF | GO:0000978~RNA polymerase II core promoter proximal region sequence-specific DNA binding              | 9  | 0.002 | JUN, ELF4, SRF, FOSB, FOS, SMAD6, ATF3, RELB, FOSL2                                                                                                                                                                                                                                     |
| D2-6m-up-only-7   | KEGG  | mmu04380:Osteoclast differentiation                                                                   | 7  | 0.004 | JUN, NCF2, IFNGR1, FOSB, FOS, RELB, FOSL2                                                                                                                                                                                                                                               |
| D2-6m-up-only-8   | KEGG  | mmu04010:MAPK signaling pathway                                                                       | 9  | 0.004 | JUN, GADD45B, GADD45A, SRF, ARRB1, FOS, DUSP8, RELB, FGFR1                                                                                                                                                                                                                              |
| D2-6m-up-only-9   | GO_MF | GO:0043565~sequence-specific DNA binding                                                              | 13 | 0.004 | JUN, SRF, SCX, FOS, FOSL2, ARNTL, FOXS1, ELF4, HOXC5, FOSB, MAFK, ATF3, NFE2L1                                                                                                                                                                                                          |
| D2-6m-up-only-10  | GO_MF | GO:0003682~chromatin binding                                                                          | 8  | 0.004 | JUN, SRF, ARID5A, NUPR1, FOS, SMAD6, RELB, FOSL2                                                                                                                                                                                                                                        |
| D2-6m-up-only-11  | GO_MF | GO:0044212~transcription regulatory region DNA binding                                                | 7  | 0.007 | JUN, ARID5A, ARRB1, FOS, SMAD6, ATF3, FOSL2                                                                                                                                                                                                                                             |
| D2-6m-up-only-12  | KEGG  | mmu05140:Leishmaniasis                                                                                | 5  | 0.008 | ITGB1, JUN, NCF2, IFNGR1, FOS                                                                                                                                                                                                                                                           |
| D2-6m-up-only-13  | GO_MF | GO:0003677~DNA binding                                                                                | 18 | 0.009 | JUN, SRF, ARID5A, SCX, FOS, SMAD6, NPAS2, FOSL2, RELB, ARNTL, FOXS1, ELF4, HOXC5, FOSB, MAFK, NUPR1, ATF3, NFE2L1                                                                                                                                                                       |
| D2-6m-up-only-14  | GO_MF | GO:0005515~protein binding                                                                            | 40 | 0.014 | ITGB1, BTG2, HIP1, NCF2, SRF, SCX, ARRB1, KLC1, NKD1, NPAS2, ARNTL, PPP1R9B, RELB, ADAMTS4, SH3PXD2A, DENND5A, NCAM1, MAP4, KIF3C, LDLRAP1, PRKCI, JUN, MLKL, ATP8B2, GADD45B, GADD45A, PLEKHA2, ACTN4, WTIP, SMAD6, CD2AP, MDFIC, MYH9, AMOTL2, MAFK, NUPR1, UTRN, NBL1, NFE2L1, FGFR1 |
| D2-6m-up-only-15  | GO_BP | GO:0006357~regulation of transcription from RNA polymerase II promoter                                | 7  | 0.015 | FOSB, MAFK, NUPR1, FOS, ATF3, RELB, FOSL2                                                                                                                                                                                                                                               |
| D2-6m-up-only-16  | GO_BP | GO:0051726~regulation of cell cycle                                                                   | 5  | 0.016 | ITGB1, JUN, GADD45B, GADD45A, ARNTL                                                                                                                                                                                                                                                     |
| D2-6m-up-only-17  | GO_BP | GO:1902895~positive regulation of pri-miRNA transcription from RNA polymerase II promoter             | 4  | 0.021 | JUN, SRF, FOS, SMAD6                                                                                                                                                                                                                                                                    |
| D2-6m-up-only-18  | KEGG  | mmu05168:Herpes simplex infection                                                                     | 5  | 0.030 | JUN, RNASEL, IFNGR1, FOS, ARNTL                                                                                                                                                                                                                                                         |
| D2-6m-up-only-19  | GO_MF | GO:0001077~transcriptional activator activity, RNA polymerase II core promoter proximal region sequen | 7  | 0.034 | JUN, ELF4, SRF, FOSB, FOS, RELB, ARNTL                                                                                                                                                                                                                                                  |
| D2-6m-up-only-20  | KEGG  | mmu04668:TNF signaling pathway                                                                        | 4  | 0.035 | JUN, MLKL, LIF, FOS                                                                                                                                                                                                                                                                     |
| D2-6m-up-only-21  | GO_MF | GO:0001047~core promoter binding                                                                      | 4  | 0.036 | GADD45A, NPAS2, RELB, ARNTL                                                                                                                                                                                                                                                             |
| D2-6m-up-only-22  | GO_BP | GO:0035914~skeletal muscle cell differentiation                                                       | 5  | 0.038 | BTG2, SCX, NUPR1, FOS, ATF3                                                                                                                                                                                                                                                             |
| D2-6m-up-only-23  | GO_MF | GO:0046982~protein heterodimerization activity                                                        | 9  | 0.040 | ITGB1, JUN, HIP1, SCX, INHBB, FOS, SPTB, ATF3, ARNTL                                                                                                                                                                                                                                    |
| D2-6m-up-only-24  | GO_MF | GO:0035612~AP-2 adaptor complex binding                                                               | 3  | 0.051 | HIP1, ARRB1, LDLRAP1                                                                                                                                                                                                                                                                    |
| D2-6m-up-only-25  | GO_MF | GO:0000976~transcription regulatory region sequence-specific DNA binding                              | 3  | 0.051 | MAFK, ATF3, ARNTL                                                                                                                                                                                                                                                                       |
| D2-6m-up-only-26  | GO_BP | GO:0043161~proteasome-mediated ubiquitin-dependent protein catabolic process                          | 3  | 0.052 | ARRB1, CD2AP, ARNTL                                                                                                                                                                                                                                                                     |
| D2-6m-up-only-27  | GO_MF | GO:0003690~double-stranded DNA binding                                                                | 4  | 0.057 | JUN, FOSB, FOS, FOSL2                                                                                                                                                                                                                                                                   |
| D2-6m-up-only-28  | GO_BP | GO:0009612~response to mechanical stimulus                                                            | 4  | 0.060 | BTG2, JUN, FOSB, INHBB                                                                                                                                                                                                                                                                  |
| D2-6m-up-only-29  | GO_BP | GO:0032870~cellular response to hormone stimulus                                                      | 4  | 0.060 | JUN, NCF2, FOSB, FOS                                                                                                                                                                                                                                                                    |
| D2-6m-up-only-30  | GO_BP | GO:0045893~positive regulation of transcription, DNA-templated                                        | 9  | 0.062 | JUN, MDFIC, ELF4, SRF, SCX, FOS, NPAS2, ARNTL, FOSL2                                                                                                                                                                                                                                    |
| D2-6m-up-only-31  | KEGG  | mmu04660:T cell receptor signaling pathway                                                            | 4  | 0.062 | JUN, NCK2, FOS, NFKBIE                                                                                                                                                                                                                                                                  |
| D2-6m-up-only-32  | GO_MF | GO:0008134~transcription factor binding                                                               | 7  | 0.066 | JUN, MDFIC, SRF, ARID5A, ARRB1, FOS, ARNTL                                                                                                                                                                                                                                              |
| D2-6m-up-only-33  | GO_BP | GO:0031175~neuron projection development                                                              | 6  | 0.073 | ITGB1, BTG2, SRF, NCAM1, MAP4, FGFR1                                                                                                                                                                                                                                                    |
| D2-6m-up-only-34  | KEGG  | mmu04662:B cell receptor signaling pathway                                                            | 3  | 0.075 | JUN, FOS, NFKBIE                                                                                                                                                                                                                                                                        |
| D2-6m-up-only-35  | GO_MF | GO:0032403~protein complex binding                                                                    | 7  | 0.080 | ITGB1, MLKL, NCK2, ACTN4, FGFR1, PPP1R9B, CD2AP                                                                                                                                                                                                                                         |
| D2-6m-up-only-36  | GO_MF | GO:0000982~transcription factor activity, RNA polymerase II core promoter proximal region sequence-s  | 3  | 0.092 | JUN, ARNTL, FOSL2                                                                                                                                                                                                                                                                       |
| D2-6m-up-only-37  | GO_MF | GO:0000980~RNA polymerase II distal enhancer sequence-specific DNA binding                            | 3  | 0.092 | JUN, SCX, NFE2L1                                                                                                                                                                                                                                                                        |
| D2-6m-up-only-38  | GO_BP | GO:0007568~aging                                                                                      | 5  | 0.092 | JUN, CNP, NCAM1, FOS, PPP1R9B                                                                                                                                                                                                                                                           |
| D2-6m-up-only-39  | GO_BP | GO:0010976~positive regulation of neuron projection development                                       | 5  | 0.092 | ITGB1, PRKCI, LIF, KIF3C, FGFR1                                                                                                                                                                                                                                                         |

|                    |       |                                                                                                      |    |       |                                                                                                                                                      |
|--------------------|-------|------------------------------------------------------------------------------------------------------|----|-------|------------------------------------------------------------------------------------------------------------------------------------------------------|
| D2-6m-up-only-40   | GO_BP | GO:0045892~negative regulation of transcription, DNA-templated                                       | 8  | 0.093 | JUN, FOXS1, MDFIC, SCX, NFKBIE, ATF3, RELB, ARNTL                                                                                                    |
| D2-6m-up-only-41   | GO_BP | GO:0070373~negative regulation of ERK1 and ERK2 cascade                                              | 3  | 0.095 | LIF, ARRB1, ATF3                                                                                                                                     |
| D2-6m-up-only-42   | GO_BP | GO:1900745~positive regulation of p38MAPK cascade                                                    | 3  | 0.095 | GADD45B, GADD45A, SASH1                                                                                                                              |
| D2-6m-up-only-43   | GO_BP | GO:0043149~stress fiber assembly                                                                     | 3  | 0.095 | ITGB1, SRF, ARRB1                                                                                                                                    |
| D2-3m-down-1       | KEGG  | mmu04514:Cell adhesion molecules (CAMs)                                                              | 6  | 0.018 | NTNG2, CLDN5, ALCAM, H2-Q6, H2-Q7, NCAM1                                                                                                             |
| D2-3m-down-2       | GO_MF | GO:0005215~transporter activity                                                                      | 5  | 0.040 | ABCA2, SLC37A2, ABCA5, SLCO2A1, ABCA9                                                                                                                |
| D2-3m-down-3       | GO_MF | GO:0016787~hydrolase activity                                                                        | 17 | 0.042 | GGT5, ENPEP, ATP8B1, PTPRO, HTRA1, PTPN21, PLAT, DUSP15, GPPD5, SULF1, PTPN14, PLA2G7, MMP23, ARSJ, DPYSL2, MMP17, PLCE1                             |
| D2-3m-down-4       | GO_BP | GO:0007155~cell adhesion                                                                             | 14 | 0.045 | COL18A1, ITGB5, LAMB2, ITGA3, SULF1, ARVCF, ALCAM, NPHS1, PODXL, COL4A3, NCAM1, SVEP1, EPHB1, CDON                                                   |
| D2-3m-down-5       | GO_BP | GO:0007411~axon guidance                                                                             | 8  | 0.045 | ROBO2, SEMA6C, ALCAM, LAMB2, DPYSL2, PTPRO, NCAM1, EPHB1                                                                                             |
| D2-3m-down-6       | GO_BP | GO:0008217~regulation of blood pressure                                                              | 4  | 0.065 | ENPEP, NPR1, NPR3, TAC4                                                                                                                              |
| D2-3m-down-7       | KEGG  | mmu04510:Focal adhesion                                                                              | 8  | 0.081 | PAK1, ITGB5, ITGA3, LAMB2, COL4A3, COL4A5, MYLK3, MYLK                                                                                               |
| D2-6m-down-1       | GO_BP | GO:0007411~axon guidance                                                                             | 10 | 0.008 | ROBO2, SEMA5A, ALCAM, NR4A3, FLRT2, LAMB2, PTPRO, GAS1, UNC5C, EPHB1                                                                                 |
| D2-6m-down-2       | GO_BP | GO:0072015~glomerular visceral epithelial cell development                                           | 6  | 0.010 | MYO1E, NPHS1, PODXL, WT1, MAGI2, GLCCI1                                                                                                              |
| D2-6m-down-3       | GO_BP | GO:0032836~glomerular basement membrane development                                                  | 5  | 0.012 | MYO1E, NPHS1, WT1, COL4A3, SULF1                                                                                                                     |
| D2-6m-down-4       | GO_BP | GO:0043010~camera-type eye development                                                               | 6  | 0.021 | CDKN1C, FOXC2, WT1, GAS1, LMX1B, CRYAB                                                                                                               |
| D2-6m-down-5       | GO_MF | GO:0005244~voltage-gated ion channel activity                                                        | 4  | 0.042 | KCNF1, CLIC5, CLIC3, KCNJ12                                                                                                                          |
| D2-6m-down-6       | GO_BP | GO:0006813~potassium ion transport                                                                   | 4  | 0.043 | NSF, KCNF1, KCNJ12, ATP1B2                                                                                                                           |
| D2-6m-down-7       | GO_BP | GO:0007155~cell adhesion                                                                             | 15 | 0.052 | ITGB5, LAMB2, AMIGO2, APLP1, ATP1B2, NPNT, SULF1, DPP4, ARVCF, ALCAM, FLRT2, NPHS1, PODXL, COL4A3, EPHB1                                             |
| D2-6m-down-8       | GO_BP | GO:0051965~positive regulation of synapse assembly                                                   | 5  | 0.057 | LINGO2, FLRT2, NTRK3, AMIGO2, EPHB1                                                                                                                  |
| D2-6m-down-9       | GO_BP | GO:0001822~kidney development                                                                        | 8  | 0.058 | CDKN1C, ROBO2, MYO1E, FOXC2, WT1, SULF1, TNS2, VEGFA                                                                                                 |
| D2-6m-down-10      | KEGG  | mmu04514:Cell adhesion molecules (CAMs)                                                              | 6  | 0.064 | NTNG2, CLDN5, ALCAM, H2-Q6, H2-Q7, VTCN1                                                                                                             |
| D2-6m-down-11      | GO_MF | GO:0016740~transferase activity                                                                      | 19 | 0.077 | HS3ST3B1, HS3ST3A1, ZAK, NTRK3, MERTK, GALNT10, MYLK3, MYLK, PAK1, LATS2, EXTL1, STK26, MGAT5, MGAT5B, CHST1, ST3GAL6, ST6GALNAC3, EPHB1, ST6GALNAC6 |
| D2-6m-down-12      | GO_MF | GO:0016757~transferase activity, transferring glycosyl groups                                        | 7  | 0.084 | EXTL1, MGAT5, MGAT5B, ST3GAL6, ST6GALNAC3, GALNT10, ST6GALNAC6                                                                                       |
| D2-6m-down-13      | GO_MF | GO:0045499~chemorepellent activity                                                                   | 4  | 0.087 | SEMA5A, FLRT2, SEMA3G, SEMA3E                                                                                                                        |
| D2-6m-down-14      | GO_BP | GO:0032835~glomerulus development                                                                    | 4  | 0.089 | ENPEP, WT1, PTPRO, PLCE1                                                                                                                             |
| D2-6m-down-15      | GO_BP | GO:0001569~patterning of blood vessels                                                               | 4  | 0.089 | SEMA5A, FOXC2, SEMA3E, VEGFA                                                                                                                         |
| D2-6m-down-16      | GO_BP | GO:0034765~regulation of ion transmembrane transport                                                 | 4  | 0.089 | KCNF1, CLIC5, CLIC3, KCNJ12                                                                                                                          |
| D2-6m-down-17      | GO_MF | GO:0000981~RNA polymerase II transcription factor activity, sequence-specific DNA binding            | 6  | 0.089 | FOXO2, PLAGL1, BHLHE41, SOX8, FOXL1, SOX5                                                                                                            |
| D2-6m-down-18      | GO_MF | GO:0004252~serine-type endopeptidase activity                                                        | 5  | 0.092 | DPP4, HTRA1, PLAT, PCSK6, RHBDL3                                                                                                                     |
| D2-6m-down-19      | GO_BP | GO:0050679~positive regulation of epithelial cell proliferation                                      | 5  | 0.094 | NR4A3, HTRA1, GAS1, TGFA, VEGFA                                                                                                                      |
| D2-3m-down-only-1  | GO_MF | GO:0005201~extracellular matrix structural constituent                                               | 3  | 0.029 | COL1A2, COL4A3, COL4A5                                                                                                                               |
| D2-3m-down-only-2  | GO_BP | GO:0048010~vascular endothelial growth factor receptor signaling pathway                             | 3  | 0.033 | FOXC1, SULF1, VEGFA                                                                                                                                  |
| D2-3m-down-only-3  | GO_BP | GO:0016525~negative regulation of angiogenesis                                                       | 4  | 0.048 | FOXC1, COL4A3, VASH1, SULF1                                                                                                                          |
| D2-3m-down-only-4  | KEGG  | mmu04974:Protein digestion and absorption                                                            | 3  | 0.071 | COL1A2, COL4A3, COL4A5                                                                                                                               |
| D2-3m-down-only-5  | KEGG  | mmu04151:PI3K-Akt signaling pathway                                                                  | 4  | 0.091 | COL1A2, COL4A3, COL4A5, VEGFA                                                                                                                        |
| D2-6m-down-only-1  | GO_BP | GO:0043010~camera-type eye development                                                               | 5  | 0.008 | CDKN1C, FOXC2, WT1, GAS1, CRYAB                                                                                                                      |
| D2-6m-down-only-2  | GO_BP | GO:0001569~patterning of blood vessels                                                               | 4  | 0.013 | SEMA5A, FOXC2, SEMA3E, VEGFA                                                                                                                         |
| D2-6m-down-only-3  | GO_BP | GO:0001822~kidney development                                                                        | 6  | 0.030 | CDKN1C, MYO1E, FOXC2, WT1, TNS2, VEGFA                                                                                                               |
| D2-6m-down-only-4  | GO_MF | GO:0000981~RNA polymerase II transcription factor activity, sequence-specific DNA binding            | 5  | 0.032 | FOXO2, PLAGL1, BHLHE41, FOXL1, SOX5                                                                                                                  |
| D2-6m-down-only-5  | GO_BP | GO:0035924~cellular response to vascular endothelial growth factor stimulus                          | 3  | 0.038 | NR4A1, GAS1, VEGFA                                                                                                                                   |
| D2-6m-down-only-6  | GO_BP | GO:1902476~chloride transmembrane transport                                                          | 3  | 0.038 | CLIC5, GABRB1, CLIC3                                                                                                                                 |
| D2-6m-down-only-7  | GO_BP | GO:0042542~response to hydrogen peroxide                                                             | 4  | 0.038 | GNAO1, NR4A3, STK26, CRYAB                                                                                                                           |
| D2-6m-down-only-8  | GO_BP | GO:0051965~positive regulation of synapse assembly                                                   | 4  | 0.038 | LINGO2, FLRT2, NTRK3, AMIGO2                                                                                                                         |
| D2-6m-down-only-9  | GO_BP | GO:0050679~positive regulation of epithelial cell proliferation                                      | 4  | 0.056 | NR4A3, GAS1, TGFA, VEGFA                                                                                                                             |
| D2-6m-down-only-10 | KEGG  | mmu00534:Glycosaminoglycan biosynthesis - heparan sulfate / heparin                                  | 3  | 0.057 | HS3ST3B1, HS3ST3A1, EXTL1                                                                                                                            |
| D2-6m-down-only-11 | GO_BP | GO:0043066~negative regulation of apoptotic process                                                  | 7  | 0.061 | NR4A3, WT1, AMIGO2, GAS1, TGFA, CRYAB, VEGFA                                                                                                         |
| D2-6m-down-only-12 | GO_BP | GO:0006813~potassium ion transport                                                                   | 3  | 0.070 | NSF, KCNF1, ATP1B2                                                                                                                                   |
| D2-6m-down-only-13 | GO_BP | GO:0043154~negative regulation of cysteine-type endopeptidase activity involved in apoptotic process | 3  | 0.070 | NR4A1, CRYAB, VEGFA                                                                                                                                  |
| D2-6m-down-only-14 | GO_BP | GO:0006821~chloride transport                                                                        | 3  | 0.070 | CLIC5, GABRB1, CLIC3                                                                                                                                 |
| D2-6m-down-only-15 | GO_BP | GO:0001938~positive regulation of endothelial cell proliferation                                     | 3  | 0.070 | SEMA5A, NR4A1, VEGFA                                                                                                                                 |
| D2-6m-down-only-16 | GO_BP | GO:0007507~heart development                                                                         | 5  | 0.070 | FOXC2, WT1, NTRK3, ADM, FOXL1                                                                                                                        |
| D2-6m-down-only-17 | GO_MF | GO:0005244~voltage-gated ion channel activity                                                        | 3  | 0.071 | KCNF1, CLIC5, CLIC3                                                                                                                                  |
| D2-6m-down-only-18 | GO_MF | GO:0005254~chloride channel activity                                                                 | 3  | 0.071 | CLIC5, GABRB1, CLIC3                                                                                                                                 |
| D2-6m-down-only-19 | GO_MF | GO:0042802~identical protein binding                                                                 | 8  | 0.073 | DPP4, FOXC2, STK26, APLP1, SNCAIP, ACP, CRYAB, VEGFA                                                                                                 |
| D2-6m-down-only-20 | GO_BP | GO:0007275~multicellular organism development                                                        | 12 | 0.094 | SEMA5A, FOXC2, FLRT2, WIF1, NTRK3, WIPF3, UNC5C, SEMA3E, NPNT, ARHGAP24, HOXC6, VEGFA                                                                |

|                     |       |                                                            |    |       |                                                                           |
|---------------------|-------|------------------------------------------------------------|----|-------|---------------------------------------------------------------------------|
| D2-3m6m-down-both-1 | KEGG  | mmu04514:Cell adhesion molecules (CAMs)                    | 5  | 0.015 | NTNG2, CLDN5, ALCAM, H2-Q6, H2-Q7                                         |
| D2-3m6m-down-both-2 | KEGG  | mmu04510:Focal adhesion                                    | 7  | 0.022 | PAK1, ITGB5, LAMB2, COL4A3, COL4A5, MYLK3, MYLK                           |
| D2-3m6m-down-both-3 | GO_BP | GO:0031290~retinal ganglion cell axon guidance             | 3  | 0.038 | ROBO2, ALCAM, EPHB1                                                       |
| D2-3m6m-down-both-4 | GO_BP | GO:0072015~glomerular visceral epithelial cell development | 4  | 0.038 | NPHS1, PODXL, MAGI2, GLCCI1                                               |
| D2-3m6m-down-both-5 | GO_MF | GO:0005524~ATP binding                                     | 11 | 0.065 | MYO1D, PAK1, ABCA5, NPR1, ZAK, ATP8B1, ABCA9, HSPA12A, EPHB1, MYLK3, MYLK |
| D2-3m6m-down-both-6 | GO_BP | GO:0007155~cell adhesion                                   | 9  | 0.073 | ARVCF, ALCAM, ITGB5, NPHS1, PODXL, LAMB2, COL4A3, SULF1, EPHB1            |
