# Supplementary material
Source: publisher figshare collection journal article supplement (https://diabetesjournals.figshare.com/articles/dataset/_/14888034)
Supplement: Supplementary file 9 [file 1]

| Gene     | Enrichment fold | Average FPKM | Description                                                             |
|----------|-----------------|--------------|-------------------------------------------------------------------------|
| Ngb      | 1025.70         | 21.5         | neuroglobin                                                             |
| Prm1     | 662.04          | 103.9        | protamine 1                                                             |
| Rarres1  | 188.76          | 15.9         | retinoic acid receptor responder 1                                      |
| Mgat5b   | 175.47          | 24.0         | alpha-1,6-mannosylglycoprotein 6-beta-N-acetylglucosaminyltransferase B |
| Crb2     | 150.90          | 44.1         | crumbs cell polarity complex component 2                                |
| Foxd1    | 139.62          | 40.8         | forkhead box D1                                                         |
| Wt1      | 136.50          | 312.5        | Wilms tumor 1 homolog                                                   |
| Lmx1b    | 134.79          | 119.3        | LIM homeobox transcription factor 1 beta                                |
| Myom2    | 134.16          | 184.6        | myomesin 2                                                              |
| Tmem54   | 133.32          | 48.4         | transmembrane protein 54                                                |
| Ptpro    | 132.05          | 231.4        | protein tyrosine phosphatase receptor type O                            |
| Tdrd5    | 127.41          | 33.3         | tudor domain containing 5                                               |
| Wif1     | 125.39          | 20.9         | WNT inhibitory factor 1                                                 |
| BB014433 | 124.65          | 15.5         | expressed sequence BB014433                                             |
| Nphs2    | 123.80          | 1339.4       | NPHS2 stomatin family member, podocin                                   |
| Nphs1    | 113.82          | 247.0        | NPHS1 adhesion molecule, nephrin                                        |
| Mrgprf   | 106.17          | 15.9         | MAS related GPR family member F                                         |
| Ddn      | 97.30           | 194.0        | dendrin                                                                 |
| Arhgap28 | 93.21           | 80.0         | Rho GTPase activating protein 28                                        |
| Rab3b    | 89.35           | 107.7        | RAB3B, member RAS oncogene family                                       |
| Sema3e   | 88.87           | 19.8         | semaphorin 3E                                                           |
| Tspan2   | 87.47           | 74.0         | tetraspanin 2                                                           |
| Clic3    | 83.83           | 321.1        | chloride intracellular channel 3                                        |
| Myl7     | 82.78           | 264.2        | myosin light chain 7                                                    |
| Srgap1   | 81.79           | 101.2        | SLIT-ROBO Rho GTPase activating protein 1                               |
| Nebi     | 80.01           | 33.0         | nebulin                                                                 |
| Synpo    | 78.78           | 767.7        | synaptopodin                                                            |
| Nes      | 78.55           | 494.1        | nestin                                                                  |
| Thsd7a   | 75.80           | 111.0        | thrombospondin type 1 domain containing 7A                              |
| Hs3st3a1 | 75.53           | 22.0         | heparan sulfate-glucosamine 3-sulfotransferase 3A1                      |
| Sema3g   | 75.08           | 610.6        | semaphorin 3G                                                           |
| Tyro3    | 74.54           | 17.3         | TYRO3 protein tyrosine kinase                                           |
| Aplp1    | 73.38           | 122.1        | amyloid beta precursor like protein 1                                   |
| Hs3st6   | 72.41           | 182.0        | heparan sulfate-glucosamine 3-sulfotransferase 6                        |
| Nxph3    | 72.38           | 79.0         | neurexophilin 3                                                         |
| Ube2ql1  | 70.72           | 16.6         | ubiquitin conjugating enzyme E2 Q family like 1                         |
| Nr4a3    | 67.41           | 21.6         | nuclear receptor subfamily 4 group A member 3                           |
| Foxd2    | 67.32           | 53.7         | forkhead box D2                                                         |
| Fndc5    | 67.22           | 72.7         | fibronectin type III domain containing 5                                |
| Shisa3   | 67.04           | 102.6        | shisa family member 3                                                   |
| Cdkn1c   | 66.16           | 571.4        | cyclin-dependent kinase inhibitor 1C (P57)                              |
| Plce1    | 65.48           | 56.2         | phospholipase C epsilon 1                                               |
| Foxl1    | 64.15           | 37.7         | forkhead box L1                                                         |
| Podxl    | 64.11           | 1755.1       | podocalyxin-like                                                        |
| C1qtnf1  | 60.78           | 139.8        | C1q and TNF related 1                                                   |
| Rhbdl3   | 60.29           | 50.3         | rhomboid like 3                                                         |
| Mmp23    | 59.98           | 37.8         | matrix metalloproteinase 23                                             |
| Fgfbp1   | 56.91           | 25.1         | fibroblast growth factor binding protein 1                              |
| Raver2   | 50.61           | 33.9         | ribonucleoprotein, PTB binding 2                                        |

|            |       |        |                                                                      |
|------------|-------|--------|----------------------------------------------------------------------|
| Cldn5      | 46.63 | 92.6   | claudin 5                                                            |
| Chst1      | 46.19 | 109.5  | carbohydrate sulfotransferase 1                                      |
| Sync       | 46.01 | 21.9   | syncoilin, intermediate filament protein                             |
| Astn2      | 45.46 | 20.3   | astrotactin 2                                                        |
| Tmem150c   | 44.89 | 95.8   | transmembrane protein 150C                                           |
| Rhpn1      | 44.88 | 196.7  | rhophilin Rho GTPase binding protein 1                               |
| H2-Q6      | 44.05 | 373.6  | histocompatibility 2, Q region locus 6                               |
| Wipf3      | 43.76 | 37.7   | WAS/WASL interacting protein family member 3                         |
| Mafa       | 43.09 | 17.7   | MAF bZIP transcription factor A                                      |
| Zbtb7c     | 40.66 | 45.4   | zinc finger and BTB domain containing 7C                             |
| Fzd2       | 40.45 | 28.2   | frizzled class receptor 2                                            |
| St6galnac6 | 39.92 | 27.9   | ST6 N-acetylgalactosaminide alpha-2,6-sialyltransferase 6            |
| Speg       | 38.84 | 40.0   | striated muscle enriched protein kinase                              |
| Rasl11a    | 37.91 | 135.2  | RAS like family 11 member A                                          |
| Foxc2      | 37.54 | 111.4  | forkhead box C2                                                      |
| Rassf10    | 35.68 | 30.9   | Ras association domain family member 10                              |
| Adcy1      | 35.65 | 41.9   | adenylate cyclase 1                                                  |
| Nr4a1      | 34.88 | 117.1  | nuclear receptor subfamily 4 group A member 1                        |
| C1qtnf7    | 34.27 | 25.5   | C1q and TNF related 7                                                |
| E2f1       | 33.69 | 34.3   | E2F transcription factor 1                                           |
| Npr3       | 33.10 | 61.7   | natriuretic peptide receptor 3                                       |
| Loxl2      | 32.84 | 57.2   | lysyl oxidase like 2                                                 |
| Ntng2      | 32.76 | 48.8   | netrin G2                                                            |
| Zfp385b    | 31.87 | 15.9   | zinc finger protein 385B                                             |
| Golim4     | 31.47 | 95.5   | golgi integral membrane protein 4                                    |
| Magi2      | 30.84 | 68.3   | membrane associated guanylate kinase, WW and PDZ domain containing 2 |
| Pigr       | 29.87 | 2683.3 | polymeric immunoglobulin receptor                                    |
| Plat       | 29.58 | 79.8   | plasminogen activator, tissue type                                   |
| Tcf21      | 29.15 | 82.9   | transcription factor 21                                              |
| Nupr1      | 28.92 | 178.4  | nuclear protein 1, transcriptional regulator                         |
| H2-Q7      | 28.79 | 52.3   | histocompatibility 2, Q region locus 7                               |
| Paxx       | 27.90 | 119.2  | non-homologous end joining factor                                    |
| Galnt10    | 27.81 | 94.2   | polypeptide N-acetylgalactosaminyltransferase 10                     |
| Marveld1   | 27.27 | 183.9  | MARVEL domain containing 1                                           |
| Inf2       | 27.08 | 76.8   | inverted formin 2                                                    |
| Acpp       | 26.32 | 29.8   | Acp3; acid phosphatase 3                                             |
| Pard3b     | 26.23 | 56.8   | par-3 family cell polarity regulator beta                            |
| Zfp423     | 26.15 | 23.4   | zinc finger protein 423                                              |
| Ripor1     | 25.64 | 539.1  | RHO family interacting cell polarization regulator 1                 |
| Coro2b     | 25.56 | 55.6   | coronin 2B                                                           |
| Anxa1      | 25.17 | 44.9   | annexin A1                                                           |
| Car13      | 25.17 | 21.0   | Ca13; carbonic anhydrase 13                                          |
| Pxdc1      | 24.89 | 24.6   | PX domain containing 1                                               |
| Vash1      | 24.59 | 38.8   | vasohibin 1                                                          |
| Itpr3      | 24.24 | 37.8   | inositol 1,4,5-trisphosphate receptor type 3                         |
| Robo2      | 23.96 | 32.8   | roundabout guidance receptor 2                                       |
| Sncaip     | 23.49 | 50.2   | synuclein alpha interacting protein                                  |
| R3hdml     | 23.43 | 34.0   | R3H domain containing like                                           |
| Mafb       | 23.03 | 309.5  | MAF bZIP transcription factor B                                      |
| Adm        | 22.40 | 59.3   | adrenomedullin                                                       |

|          |       |       |                                                                       |
|----------|-------|-------|-----------------------------------------------------------------------|
| Gdpd5    | 22.13 | 18.9  | glycerophosphodiester phosphodiesterase domain containing 5           |
| Hspb8    | 21.71 | 36.6  | heat shock protein family B (small) member 8                          |
| Mtcl1    | 21.37 | 33.6  | microtubule crosslinking factor 1                                     |
| Gas7     | 21.11 | 29.6  | growth arrest specific 7                                              |
| Gpsm3    | 20.86 | 73.4  | G protein signaling modulator 3                                       |
| Ehd2     | 19.12 | 113.3 | EH domain containing 2                                                |
| Angptl2  | 18.93 | 110.6 | angiopoietin like 2                                                   |
| Tm4sf1   | 18.79 | 46.5  | transmembrane 4 L six family member 1                                 |
| Arhgap23 | 18.69 | 59.9  | Rho GTPase activating protein 23                                      |
| St3gal1  | 18.66 | 63.9  | ST3 beta-galactoside alpha-2,3-sialyltransferase 1                    |
| Ksr1     | 18.50 | 35.8  | kinase suppressor of ras 1                                            |
| Kirrel   | 18.10 | 51.2  | kirre like nephrin family adhesion molecule 1                         |
| Anxa3    | 17.76 | 32.8  | annexin A3                                                            |
| Plekhh2  | 17.62 | 25.4  | pleckstrin homology, MyTH4 and FERM domain containing H2              |
| Pros1    | 17.35 | 36.8  | protein S                                                             |
| Plekho1  | 17.25 | 78.3  | pleckstrin homology domain containing O1                              |
| Npr1     | 17.11 | 49.5  | natriuretic peptide receptor 1                                        |
| Ccdc92   | 16.99 | 54.9  | coiled-coil domain containing 92                                      |
| Mgat5    | 16.65 | 126.3 | alpha-1,6-mannosylglycoprotein 6-beta-N-acetylglucosaminyltransferase |
| Kcnj12   | 16.43 | 15.0  | potassium inwardly rectifying channel subfamily J member 12           |
| Tmtc1    | 16.30 | 54.5  | transmembrane O-mannosyltransferase targeting cadherins 1             |
| Cdc14a   | 16.22 | 21.9  | cell division cycle 14A                                               |
| Gadd45a  | 16.22 | 125.0 | growth arrest and DNA damage inducible alpha                          |
| Ablim3   | 15.81 | 56.8  | actin binding LIM protein family member 3                             |
| Mcc      | 15.76 | 28.5  | MCC regulator of WNT signaling pathway                                |
| Vim      | 15.69 | 149.2 | vimentin                                                              |
| Hoxc8    | 15.20 | 31.5  | homeobox C8                                                           |

| Gene     | Enrichment fold | Average FPKM | Description                                                             |
|----------|-----------------|--------------|-------------------------------------------------------------------------|
| Ngb      | 1025.70         | 21.5         | neuroglobin                                                             |
| Prm1     | 662.04          | 103.9        | protamine 1                                                             |
| Rarres1  | 188.76          | 15.9         | retinoic acid receptor responder 1                                      |
| Mgat5b   | 175.47          | 24.0         | alpha-1,6-mannosylglycoprotein 6-beta-N-acetylglucosaminyltransferase B |
| Gja3     | 170.16          | 8.5          | gap junction protein alpha 3                                            |
| Crb2     | 150.90          | 44.1         | crumbs cell polarity complex component 2                                |
| Foxd1    | 139.62          | 40.8         | forkhead box D1                                                         |
| Gabra4   | 139.49          | 2.5          | gamma-aminobutyric acid type A receptor subunit alpha4                  |
| Wt1      | 136.50          | 312.5        | Wilms tumor 1 homolog                                                   |
| Lmx1b    | 134.79          | 119.3        | LIM homeobox transcription factor 1 beta                                |
| Myom2    | 134.16          | 184.6        | myomesin 2                                                              |
| Tmem54   | 133.32          | 48.4         | transmembrane protein 54                                                |
| Ptpro    | 132.05          | 231.4        | protein tyrosine phosphatase receptor type O                            |
| Rdh1     | 129.53          | 12.2         | retinol dehydrogenase 1                                                 |
| Tdrd5    | 127.41          | 33.3         | tudor domain containing 5                                               |
| Wif1     | 125.39          | 20.9         | WNT inhibitory factor 1                                                 |
| BB014433 | 124.65          | 15.5         | expressed sequence BB014433                                             |
| Nphs2    | 123.80          | 1339.4       | NPHS2 stomatin family member, podocin                                   |
| Nphs1    | 113.82          | 247.0        | NPHS1 adhesion molecule, nephrin                                        |
| Mrgprf   | 106.17          | 15.9         | MAS related GPR family member F                                         |
| Myl3     | 105.91          | 1.9          | myosin light chain 3                                                    |
| Myoz1    | 105.21          | 2.1          | myozenin 1                                                              |
| Arsj     | 101.24          | 3.8          | arylsulfatase family member J                                           |
| Ddn      | 97.30           | 194.0        | dendrin                                                                 |
| Arhgap28 | 93.21           | 80.0         | Rho GTPase activating protein 28                                        |
| Kcnf1    | 91.12           | 13.3         | potassium voltage-gated channel modifier subfamily F member 1           |
| Rab3b    | 89.35           | 107.7        | RAB3B, member RAS oncogene family                                       |
| Sema3e   | 88.87           | 19.8         | semaphorin 3E                                                           |
| Tspan2   | 87.47           | 74.0         | tetraspanin 2                                                           |
| Smyd1    | 85.59           | 4.9          | SET and MYND domain containing 1                                        |
| Usp13    | 84.17           | 6.6          | ubiquitin specific peptidase 13                                         |
| Clic3    | 83.83           | 321.1        | chloride intracellular channel 3                                        |
| Hpca     | 83.78           | 6.4          | hippocalcin                                                             |
| Lingo2   | 83.52           | 6.7          | leucine rich repeat and Ig domain containing 2                          |
| Myl7     | 82.78           | 264.2        | myosin light chain 7                                                    |
| Srgap1   | 81.79           | 101.2        | SLIT-ROBO Rho GTPase activating protein 1                               |
| Neb1     | 80.01           | 33.0         | nebulette                                                               |
| Synpo    | 78.78           | 767.7        | synaptopodin                                                            |
| Nes      | 78.55           | 494.1        | nestin                                                                  |
| Thsd7a   | 75.80           | 111.0        | thrombospondin type 1 domain containing 7A                              |
| Hs3st3a1 | 75.53           | 22.0         | heparan sulfate-glucosamine 3-sulfotransferase 3A1                      |
| Gdf5     | 75.32           | 3.6          | growth differentiation factor 5                                         |
| Epha6    | 75.26           | 3.2          | EPH receptor A6                                                         |
| Sema3g   | 75.08           | 610.6        | semaphorin 3G                                                           |
| Tyro3    | 74.54           | 17.3         | TYRO3 protein tyrosine kinase                                           |
| Aplp1    | 73.38           | 122.1        | amyloid beta precursor like protein 1                                   |
| Hs3st6   | 72.41           | 182.0        | heparan sulfate-glucosamine 3-sulfotransferase 6                        |
| Nxph3    | 72.38           | 79.0         | neurexophilin 3                                                         |
| Ube2ql1  | 70.72           | 16.6         | ubiquitin conjugating enzyme E2 Q family like 1                         |

|            |       |        |                                                                               |
|------------|-------|--------|-------------------------------------------------------------------------------|
| Nr4a3      | 67.41 | 21.6   | nuclear receptor subfamily 4 group A member 3                                 |
| Foxd2      | 67.32 | 53.7   | forkhead box D2                                                               |
| Fndc5      | 67.22 | 72.7   | fibronectin type III domain containing 5                                      |
| Shisa3     | 67.04 | 102.6  | shisa family member 3                                                         |
| Cdkn1c     | 66.16 | 571.4  | cyclin-dependent kinase inhibitor 1C (P57)                                    |
| Plce1      | 65.48 | 56.2   | phospholipase C epsilon 1                                                     |
| Foxl1      | 64.15 | 37.7   | forkhead box L1                                                               |
| Podxl      | 64.11 | 1755.1 | podocalyxin-like                                                              |
| Tshb       | 63.08 | 4.6    | thyroid stimulating hormone subunit beta                                      |
| Srrm4      | 61.23 | 5.4    | serine/arginine repetitive matrix 4                                           |
| Sgip1      | 60.94 | 9.1    | SH3GL interacting endocytic adaptor 1                                         |
| C1qtnf1    | 60.78 | 139.8  | C1q and TNF related 1                                                         |
| Rhbdl3     | 60.29 | 50.3   | rhomboid like 3                                                               |
| Mmp23      | 59.98 | 37.8   | matrix metalloproteinase 23                                                   |
| Fgfbp1     | 56.91 | 25.1   | fibroblast growth factor binding protein 1                                    |
| Wfikkn2    | 53.41 | 1.5    | WAP, follistatin/kazal, immunoglobulin, kunitz and netrin domain containing 2 |
| Ntrk3      | 52.68 | 5.5    | neurotrophic receptor tyrosine kinase 3                                       |
| Raver2     | 50.61 | 33.9   | ribonucleoprotein, PTB binding 2                                              |
| Nell2      | 48.76 | 2.6    | neural EGFL like 2                                                            |
| Cldn5      | 46.63 | 92.6   | claudin 5                                                                     |
| Chst1      | 46.19 | 109.5  | carbohydrate sulfotransferase 1                                               |
| Sync       | 46.01 | 21.9   | syncoilin, intermediate filament protein                                      |
| Astn2      | 45.46 | 20.3   | astrotactin 2                                                                 |
| Ptchd4     | 45.09 | 4.1    | patched domain containing 4                                                   |
| Tmem150c   | 44.89 | 95.8   | transmembrane protein 150C                                                    |
| Rhpn1      | 44.88 | 196.7  | rhophilin Rho GTPase binding protein 1                                        |
| H2-Q6      | 44.05 | 373.6  | histocompatibility 2, Q region locus 6                                        |
| Wipf3      | 43.76 | 37.7   | WAS/WASL interacting protein family member 3                                  |
| Glp1r      | 43.70 | 10.9   | glucagon like peptide 1 receptor                                              |
| Mafa       | 43.09 | 17.7   | MAF bZIP transcription factor A                                               |
| Necab3     | 42.83 | 5.0    | N-terminal EF-hand calcium binding protein 3                                  |
| Kcng2      | 42.82 | 11.6   | potassium voltage-gated channel modifier subfamily G member 2                 |
| Gbx1       | 41.84 | 8.0    | gastrulation brain homeobox 1                                                 |
| Sulf1      | 41.79 | 10.4   | sulfatase 1                                                                   |
| Zbtb7c     | 40.66 | 45.4   | zinc finger and BTB domain containing 7C                                      |
| Eya4       | 40.46 | 2.1    | EYA transcriptional coactivator and phosphatase 4                             |
| Fzd2       | 40.45 | 28.2   | frizzled class receptor 2                                                     |
| St6galnac6 | 39.92 | 27.9   | ST6 N-acetylgalactosaminide alpha-2,6-sialyltransferase 6                     |
| Spep       | 38.84 | 40.0   | striated muscle enriched protein kinase                                       |
| Dlk2       | 38.79 | 3.4    | delta like non-canonical Notch ligand 2                                       |
| Nectin4    | 38.79 | 13.0   | nectin cell adhesion molecule 4                                               |
| Rasl11a    | 37.91 | 135.2  | RAS like family 11 member A                                                   |
| Amph       | 37.80 | 3.4    | amphiphysin                                                                   |
| Ager       | 37.69 | 2.6    | advanced glycosylation end-product specific receptor                          |
| Foxc2      | 37.54 | 111.4  | forkhead box C2                                                               |
| Vttn1      | 36.06 | 13.2   | V-set domain containing T cell activation inhibitor 1                         |
| Rassf10    | 35.68 | 30.9   | Ras association domain family member 10                                       |
| Adcy1      | 35.65 | 41.9   | adenylate cyclase 1                                                           |
| Dync1i1    | 35.22 | 4.4    | dynein cytoplasmic 1 intermediate chain 1                                     |
| Nr4a1      | 34.88 | 117.1  | nuclear receptor subfamily 4 group A member 1                                 |

|            |       |        |                                                                      |
|------------|-------|--------|----------------------------------------------------------------------|
| Tmem95     | 34.75 | 2.4    | transmembrane protein 95                                             |
| C1qtnf7    | 34.27 | 25.5   | C1q and TNF related 7                                                |
| Gdnf       | 34.05 | 6.1    | glial cell derived neurotrophic factor                               |
| Fam78b     | 33.94 | 7.1    | family with sequence similarity 78 member B                          |
| E2f1       | 33.69 | 34.3   | E2F transcription factor 1                                           |
| Lingo1     | 33.53 | 2.1    | leucine rich repeat and Ig domain containing 1                       |
| Npr3       | 33.10 | 61.7   | natriuretic peptide receptor 3                                       |
| Loxl2      | 32.84 | 57.2   | lysyl oxidase like 2                                                 |
| Ntng2      | 32.76 | 48.8   | netrin G2                                                            |
| Zfp385b    | 31.87 | 15.9   | zinc finger protein 385B                                             |
| Golim4     | 31.47 | 95.5   | golgi integral membrane protein 4                                    |
| Kirrel2    | 31.38 | 2.4    | kirre like nephrin family adhesion molecule 2                        |
| Asic2      | 31.32 | 7.3    | acid sensing ion channel subunit 2                                   |
| Magi2      | 30.84 | 68.3   | membrane associated guanylate kinase, WW and PDZ domain containing 2 |
| Pigr       | 29.87 | 2683.3 | polymeric immunoglobulin receptor                                    |
| Plat       | 29.58 | 79.8   | plasminogen activator, tissue type                                   |
| Tcf21      | 29.15 | 82.9   | transcription factor 21                                              |
| B3galt2    | 29.11 | 5.6    | beta-1,3-galactosyltransferase 2                                     |
| Nupr1      | 28.92 | 178.4  | nuclear protein 1, transcriptional regulator                         |
| H2-Q7      | 28.79 | 52.3   | histocompatibility 2, Q region locus 7                               |
| Tmc7       | 28.67 | 5.0    | transmembrane channel like 7                                         |
| Paxx       | 27.90 | 119.2  | non-homologous end joining factor                                    |
| Galnt10    | 27.81 | 94.2   | polypeptide N-acetylgalactosaminyltransferase 10                     |
| Marveld1   | 27.27 | 183.9  | MARVEL domain containing 1                                           |
| Inf2       | 27.08 | 76.8   | inverted formin 2                                                    |
| Hrh2       | 26.33 | 1.6    | histamine receptor H2                                                |
| Acpp       | 26.32 | 29.8   | Acp3; acid phosphatase 3                                             |
| Pard3b     | 26.23 | 56.8   | par-3 family cell polarity regulator beta                            |
| Tac4       | 26.21 | 1.5    | tachykinin 4                                                         |
| Zfp423     | 26.15 | 23.4   | zinc finger protein 423                                              |
| Ripor1     | 25.64 | 539.1  | RHO family interacting cell polarization regulator 1                 |
| Coro2b     | 25.56 | 55.6   | coronin 2B                                                           |
| Anxa1      | 25.17 | 44.9   | annexin A1                                                           |
| Car13      | 25.17 | 21.0   | Ca13; carbonic anhydrase 13                                          |
| Flrt2      | 25.12 | 14.2   | fibronectin leucine rich transmembrane protein 2                     |
| Map1a      | 24.94 | 13.5   | microtubule associated protein 1A                                    |
| Pxdc1      | 24.89 | 24.6   | PX domain containing 1                                               |
| Vash1      | 24.59 | 38.8   | vasohibin 1                                                          |
| Slc17a9    | 24.42 | 2.0    | solute carrier family 17 member 9                                    |
| Sox8       | 24.38 | 8.4    | SRY-box transcription factor 8                                       |
| Itpr3      | 24.24 | 37.8   | inositol 1,4,5-trisphosphate receptor type 3                         |
| Robo2      | 23.96 | 32.8   | roundabout guidance receptor 2                                       |
| St6galnac3 | 23.53 | 4.5    | ST6 N-acetylgalactosaminide alpha-2,6-sialyltransferase 3            |
| Sncap      | 23.49 | 50.2   | synuclein alpha interacting protein                                  |
| R3hdml     | 23.43 | 34.0   | R3H domain containing like                                           |
| Mafb       | 23.03 | 309.5  | MAF bZIP transcription factor B                                      |
| Adm        | 22.40 | 59.3   | adrenomedullin                                                       |
| Gdpd5      | 22.13 | 18.9   | glycerophosphodiester phosphodiesterase domain containing 5          |
| Itga2      | 22.11 | 4.0    | integrin subunit alpha 2                                             |
| Hspb8      | 21.71 | 36.6   | heat shock protein family B (small) member 8                         |

|            |       |       |                                                                       |
|------------|-------|-------|-----------------------------------------------------------------------|
| Lrrc49     | 21.44 | 9.5   | leucine rich repeat containing 49                                     |
| Mtcl1      | 21.37 | 33.6  | microtubule crosslinking factor 1                                     |
| Gas7       | 21.11 | 29.6  | growth arrest specific 7                                              |
| Ephb1      | 21.07 | 12.2  | EPH receptor B1                                                       |
| Fosb       | 21.07 | 5.5   | FosB proto-oncogene, AP-1 transcription factor subunit                |
| Gm266      | 21.04 | 13.4  | predicted gene 266                                                    |
| Abra       | 20.99 | 4.8   | actin binding Rho activating protein                                  |
| Pianp      | 20.89 | 3.5   | PILR alpha associated neural protein                                  |
| D16Ert472e | 20.89 | 7.9   | C21orf91; chromosome 21 open reading frame 91                         |
| Gpsm3      | 20.86 | 73.4  | G protein signaling modulator 3                                       |
| Syt9       | 20.47 | 8.6   | synaptotagmin 9                                                       |
| Lysmd2     | 20.42 | 6.4   | LysM domain containing 2                                              |
| Prx        | 20.30 | 11.4  | periaxin                                                              |
| Lor        | 19.69 | 9.4   | Loricrin; loricrin cornified envelope precursor protein               |
| Arhgef26   | 19.57 | 5.6   | Rho guanine nucleotide exchange factor 26                             |
| Ehd2       | 19.12 | 113.3 | EH domain containing 2                                                |
| Syn1       | 18.96 | 2.1   | synapsin I                                                            |
| Angptl2    | 18.93 | 110.6 | angiopoietin like 2                                                   |
| Tm4sf1     | 18.79 | 46.5  | transmembrane 4 L six family member 1                                 |
| Arhgap23   | 18.69 | 59.9  | Rho GTPase activating protein 23                                      |
| St3gal1    | 18.66 | 63.9  | ST3 beta-galactoside alpha-2,3-sialyltransferase 1                    |
| Cmtm7      | 18.64 | 10.0  | CKLF like MARVEL transmembrane domain containing 7                    |
| Mmp17      | 18.59 | 3.4   | matrix metalloproteinase 17                                           |
| Ksr1       | 18.50 | 35.8  | kinase suppressor of ras 1                                            |
| Fxyd6      | 18.46 | 11.3  | FXFD domain containing ion transport regulator 6                      |
| Myzap      | 18.45 | 3.3   | myocardial zonula adherens protein                                    |
| Csdc2      | 18.39 | 11.5  | cold shock domain containing C2                                       |
| Kirrel     | 18.10 | 51.2  | kirre like nephrin family adhesion molecule 1                         |
| Samd5      | 18.02 | 10.2  | sterile alpha motif domain containing 5                               |
| Anxa3      | 17.76 | 32.8  | annexin A3                                                            |
| Plekhh2    | 17.62 | 25.4  | pleckstrin homology, MyTH4 and FERM domain containing H2              |
| Bend4      | 17.37 | 2.3   | BEN domain containing 4                                               |
| Pros1      | 17.35 | 36.8  | protein S                                                             |
| Plekho1    | 17.25 | 78.3  | pleckstrin homology domain containing O1                              |
| Gabbr1     | 17.20 | 1.8   | gamma-aminobutyric acid type A receptor subunit beta1                 |
| Npr1       | 17.11 | 49.5  | natriuretic peptide receptor 1                                        |
| Ccdc92     | 16.99 | 54.9  | coiled-coil domain containing 92                                      |
| Sptbn5     | 16.79 | 2.5   | spectrin beta, non-erythrocytic 5                                     |
| Mgat5      | 16.65 | 126.3 | alpha-1,6-mannosylglycoprotein 6-beta-N-acetylglucosaminyltransferase |
| Kcnj12     | 16.43 | 15.0  | potassium inwardly rectifying channel subfamily J member 12           |
| Tmtc1      | 16.30 | 54.5  | transmembrane O-mannosyltransferase targeting cadherins 1             |
| Cdc14a     | 16.22 | 21.9  | cell division cycle 14A                                               |
| Gadd45a    | 16.22 | 125.0 | growth arrest and DNA damage inducible alpha                          |
| Agpat4     | 16.14 | 12.1  | 1-acylglycerol-3-phosphate O-acyltransferase 4                        |
| Ablim3     | 15.81 | 56.8  | actin binding LIM protein family member 3                             |
| Mcc        | 15.76 | 28.5  | MCC regulator of WNT signaling pathway                                |
| Vim        | 15.69 | 149.2 | vimentin                                                              |
| Stk26      | 15.47 | 6.4   | serine/threonine kinase 26                                            |
| Hoxc8      | 15.20 | 31.5  | homeobox C8                                                           |
| Fyn        | 14.95 | 54.3  | FYN proto-oncogene, Src family tyrosine kinase                        |

|               |       |       |                                                                          |
|---------------|-------|-------|--------------------------------------------------------------------------|
| St6gal1       | 14.75 | 49.7  | ST6 beta-galactoside alpha-2,6-sialyltransferase 1                       |
| Tmod3         | 14.74 | 44.0  | tropomodulin 3                                                           |
| Lgals2        | 14.44 | 4.5   | galectin 2                                                               |
| LctI          | 14.24 | 3.8   | lactase like                                                             |
| Optn          | 14.13 | 50.9  | optineurin                                                               |
| Tspan15       | 14.04 | 19.8  | tetraspanin 15                                                           |
| Il6ra         | 13.85 | 12.1  | interleukin 6 receptor, alpha                                            |
| Ust           | 13.84 | 7.4   | uronyl 2-sulfotransferase                                                |
| Tgfa          | 13.81 | 14.8  | transforming growth factor alpha                                         |
| Cavin1        | 13.74 | 260.8 | caveolae associated 1                                                    |
| Foxs1         | 13.73 | 3.5   | forkhead box S1                                                          |
| Tcf23         | 13.71 | 2.5   | transcription factor 23                                                  |
| Extl1         | 13.71 | 9.9   | exostosin like glycosyltransferase 1                                     |
| Gm1673        | 13.59 | 3.0   | predicted gene 1673                                                      |
| Daam2         | 13.57 | 52.4  | dishevelled associated activator of morphogenesis 2                      |
| Mpp3          | 13.54 | 1.6   | membrane palmitoylated protein 3                                         |
| Arvcf         | 13.50 | 9.2   | ARVCF delta catenin family member                                        |
| Gas1          | 13.50 | 161.2 | growth arrest specific 1                                                 |
| Iffo2         | 13.48 | 14.0  | intermediate filament family orphan 2                                    |
| Lrrfip1       | 13.29 | 88.2  | LRR binding FLII interacting protein 1                                   |
| Efnb1         | 13.29 | 115.1 | ephrin B1                                                                |
| Zbtb8a        | 13.12 | 15.7  | zinc finger and BTB domain containing 8A                                 |
| Tmsb4x        | 13.05 | 573.5 | thymosin, beta 4, X chromosome                                           |
| Fam222a       | 13.03 | 37.1  | family with sequence similarity 222 member A                             |
| Dcdc2a        | 12.92 | 24.1  | doublecortin domain containing 2a                                        |
| Itgb5         | 12.89 | 267.3 | integrin subunit beta 5                                                  |
| Sparc         | 12.75 | 308.3 | secreted protein acidic and cysteine rich                                |
| Sema6c        | 12.72 | 5.1   | semaphorin 6C                                                            |
| Chrn1         | 12.54 | 12.4  | cholinergic receptor nicotinic beta 1 subunit                            |
| 6030419C18Rik | 12.45 | 6.9   | Insyn1; inhibitory synaptic factor 1                                     |
| Tmem47        | 12.42 | 8.9   | transmembrane protein 47                                                 |
| Ptpn14        | 12.32 | 65.4  | protein tyrosine phosphatase non-receptor type 14                        |
| Hid1          | 11.93 | 5.8   | HID1 domain containing                                                   |
| Map3k20       | 11.91 | 28.0  | mitogen-activated protein kinase kinase kinase 20                        |
| Dctd          | 11.78 | 5.1   | dCMP deaminase                                                           |
| Dpysl2        | 11.59 | 160.8 | dihydropyrimidinase like 2                                               |
| Msl3l2        | 11.52 | 4.4   | MSL3 like 2                                                              |
| Itga3         | 11.47 | 99.8  | integrin subunit alpha 3                                                 |
| Gadd45b       | 11.47 | 20.5  | growth arrest and DNA damage inducible beta                              |
| Tmem108       | 11.35 | 5.1   | transmembrane protein 108                                                |
| Adamts4       | 11.34 | 2.6   | ADAM metallopeptidase with thrombospondin type 1 motif 4                 |
| Mylk3         | 11.15 | 3.7   | myosin light chain kinase 3                                              |
| Pde4b         | 11.13 | 11.5  | phosphodiesterase 4B                                                     |
| Adcy5         | 11.12 | 21.0  | adenylate cyclase 5                                                      |
| Serpib6b      | 11.09 | 23.4  | serine (or cysteine) peptidase inhibitor, clade B, member 6b             |
| Dpp4          | 11.09 | 98.4  | dipeptidyl peptidase 4                                                   |
| Pknox2        | 11.08 | 3.8   | PBX/knotted 1 homeobox 2                                                 |
| Mgat4a        | 10.99 | 24.2  | alpha-1,3-mannosyl-glycoprotein 4-beta-N-acetylglucosaminyltransferase A |
| Arhgef17      | 10.97 | 126.7 | Rho guanine nucleotide exchange factor 17                                |
| Top1mt        | 10.88 | 175.9 | DNA topoisomerase I mitochondrial                                        |



|          |       |       |                                                                      |
|----------|-------|-------|----------------------------------------------------------------------|
| Dach1    | 10.77 | 57.7  | dachshund family transcription factor 1                              |
| Pdzd7    | 10.76 | 6.2   | PDZ domain containing 7                                              |
| Rusc2    | 10.71 | 54.0  | RUN and SH3 domain containing 2                                      |
| Fam129b  | 10.70 | 92.2  | Niban2; niban apoptosis regulator 2                                  |
| Dusp8    | 10.64 | 13.4  | dual specificity phosphatase 8                                       |
| Cep85l   | 10.63 | 13.7  | centrosomal protein 85 like                                          |
| Pag1     | 10.47 | 21.0  | phosphoprotein membrane anchor with glycosphingolipid microdomains 1 |
| Slc9a3r2 | 10.44 | 177.6 | SLC9A3 regulator 2                                                   |
| Atp8b1   | 10.44 | 25.6  | ATPase phospholipid transporting 8B1                                 |
| Myo1e    | 10.41 | 86.7  | myosin IE                                                            |
| Lif      | 10.32 | 1.8   | LIF interleukin 6 family cytokine                                    |
| Foxc1    | 10.28 | 50.6  | forkhead box C1                                                      |
| Cd55     | 10.21 | 14.8  | CD55 molecule (Cromer blood group)                                   |
| Pak1     | 10.17 | 152.0 | p21 (RAC1) activated kinase 1                                        |
| Anxa2    | 10.13 | 69.7  | annexin A2                                                           |
| Pcsk6    | 10.01 | 60.1  | proprotein convertase subtilisin/kexin type 6                        |
| Cd59b    | 10.00 | 11.4  | CD59b antigen                                                        |
| Sh3bgrl2 | 9.93  | 65.8  | SH3 domain binding glutamate rich protein like 2                     |
| Mylk     | 9.92  | 191.4 | myosin light chain kinase                                            |
| Klhl29   | 9.90  | 6.3   | kelch like family member 29                                          |
| Rab30    | 9.87  | 2.4   | RAB30, member RAS oncogene family                                    |
| Fam212b  | 9.85  | 1.8   | Inka2; inka box actin regulator 2                                    |
| Plod2    | 9.79  | 38.8  | procollagen-lysine,2-oxoglutarate 5-dioxygenase 2                    |
| P2ry6    | 9.76  | 11.1  | pyrimidinergic receptor P2Y6                                         |
| Nr4a2    | 9.75  | 2.2   | nuclear receptor subfamily 4 group A member 2                        |
| Arl4d    | 9.72  | 113.7 | ADP ribosylation factor like GTPase 4D                               |
| Snx31    | 9.67  | 34.1  | sorting nexin 31                                                     |
| Stxbp1   | 9.64  | 26.1  | syntaxin binding protein 1                                           |
| Siva1    | 9.63  | 12.3  | SIVA1 apoptosis inducing factor                                      |
| Msrb3    | 9.60  | 33.8  | methionine sulfoxide reductase B3                                    |
| Elmo1    | 9.59  | 4.4   | engulfment and cell motility 1                                       |
| Arl4c    | 9.57  | 18.8  | ADP ribosylation factor like GTPase 4C                               |
| Rspo1    | 9.53  | 1.8   | R-spondin 1                                                          |
| Plekhg1  | 9.49  | 34.4  | pleckstrin homology and RhoGEF domain containing G1                  |
| Uaca     | 9.36  | 144.3 | uveal autoantigen with coiled-coil domains and ankyrin repeats       |
| Ggt5     | 9.34  | 6.7   | gamma-glutamyltransferase 5                                          |
| Enpep    | 9.33  | 289.6 | glutamyl aminopeptidase                                              |
| Uprt     | 9.33  | 37.5  | uracil phosphoribosyltransferase homolog                             |
| Fam114a1 | 9.20  | 22.2  | family with sequence similarity 114 member A1                        |
| Plagl1   | 9.20  | 25.9  | PLAG1 like zinc finger 1                                             |
| Tubb2b   | 9.20  | 24.4  | tubulin beta 2B class IIb                                            |
| Gfod1    | 9.19  | 6.1   | glucose-fructose oxidoreductase domain containing 1                  |
| Fgl2     | 9.18  | 10.6  | fibrinogen like 2                                                    |
| Nsf      | 9.14  | 73.9  | N-ethylmaleimide sensitive factor, vesicle fusing ATPase             |
| Hspa12a  | 9.14  | 77.3  | heat shock protein family A (Hsp70) member 12A                       |
| Setd7    | 9.11  | 40.6  | SET domain containing 7, histone lysine methyltransferase            |
| Anks1b   | 9.07  | 1.8   | ankyrin repeat and sterile alpha motif domain containing 1B          |
| Cd59a    | 8.94  | 112.4 | CD59a antigen                                                        |
| Vgll3    | 8.91  | 4.6   | vestigial like family member 3                                       |
| Prkg1    | 8.87  | 6.3   | protein kinase cGMP-dependent 1                                      |

|               |      |       |                                                                |
|---------------|------|-------|----------------------------------------------------------------|
| Sh2d4a        | 8.81 | 51.0  | SH2 domain containing 4A                                       |
| Frmd6         | 8.77 | 9.5   | FERM domain containing 6                                       |
| Peli3         | 8.74 | 2.9   | pellino E3 ubiquitin protein ligase family member 3            |
| Dagla         | 8.71 | 15.4  | diacylglycerol lipase alpha                                    |
| Pde3a         | 8.69 | 11.7  | phosphodiesterase 3A                                           |
| Gsn           | 8.68 | 165.2 | gelsolin                                                       |
| Lats2         | 8.67 | 35.2  | large tumor suppressor kinase 2                                |
| Sspn          | 8.61 | 9.3   | sarcospan                                                      |
| Aard          | 8.56 | 1.9   | alanine and arginine rich domain containing protein            |
| Fmnl2         | 8.53 | 42.4  | formin like 2                                                  |
| Nbl1          | 8.45 | 23.3  | NBL1, DAN family BMP antagonist                                |
| Arhgef18      | 8.44 | 103.0 | Rho/Rac guanine nucleotide exchange factor 18                  |
| Nod1          | 8.44 | 26.5  | nucleotide binding oligomerization domain containing 1         |
| Slc36a4       | 8.40 | 12.8  | solute carrier family 36 member 4                              |
| Abca9         | 8.36 | 15.5  | ATP binding cassette subfamily A member 9                      |
| Dock5         | 8.33 | 62.8  | dedicator of cytokinesis 5                                     |
| Clic5         | 8.14 | 363.7 | chloride intracellular channel 5                               |
| Zfp521        | 8.14 | 6.1   | zinc finger protein 521                                        |
| Asb15         | 8.13 | 12.3  | ankyrin repeat and SOCS box containing 15                      |
| Eml2          | 8.12 | 47.9  | EMAP like 2                                                    |
| Fos           | 8.11 | 7.5   | Fos proto-oncogene, AP-1 transcription factor subunit          |
| Metrnl        | 8.08 | 51.0  | meteorin like, glial cell differentiation regulator            |
| Pdlim2        | 8.02 | 27.9  | PDZ and LIM domain 2                                           |
| 1700025G04Rik | 8.00 | 7.1   | C1orf21; chromosome 1 open reading frame 21                    |
| Pkdcc         | 7.94 | 27.6  | protein kinase domain containing, cytoplasmic                  |
| Npnt          | 7.92 | 170.0 | nephronectin                                                   |
| Lamb2         | 7.86 | 56.2  | laminin subunit beta 2                                         |
| Bcam          | 7.82 | 189.2 | basal cell adhesion molecule (Lutheran blood group)            |
| Hs3st3b1      | 7.81 | 15.1  | heparan sulfate-glucosamine 3-sulfotransferase 3B1             |
| Endou         | 7.80 | 6.9   | endonuclease, poly(U) specific                                 |
| Nde1          | 7.78 | 46.1  | nudE neurodevelopment protein 1                                |
| Txlnb         | 7.71 | 1.7   | taxilin beta                                                   |
| Timp2         | 7.61 | 93.0  | TIMP metalloproteinase inhibitor 2                             |
| Hist2h3c2     | 7.61 | 5.8   | H3c15; H3 clustered histone 15                                 |
| Cdc42se2      | 7.60 | 58.1  | CDC42 small effector 2                                         |
| Ncf2          | 7.59 | 4.0   | neutrophil cytosolic factor 2                                  |
| Tns3          | 7.58 | 177.7 | tensin 3                                                       |
| Septin6       | 7.57 | 6.1   | septin 6                                                       |
| Mcub          | 7.57 | 2.1   | mitochondrial calcium uniporter dominant negative beta subunit |
| Epn3          | 7.56 | 91.3  | epsin 3                                                        |
| Wnt4          | 7.55 | 6.3   | Wnt family member 4                                            |
| Card10        | 7.54 | 184.4 | caspase recruitment domain family member 10                    |
| Glcci1        | 7.52 | 3.7   | glucocorticoid induced 1                                       |
| Tjp1          | 7.45 | 125.3 | tight junction protein 1                                       |
| Nab2          | 7.45 | 56.3  | NGFI-A binding protein 2                                       |
| 2010300C02Rik | 7.43 | 2.9   | Cracdl; capping protein inhibiting regulator of actin like     |
| Reep2         | 7.40 | 2.6   | receptor accessory protein 2                                   |
| Mxra7         | 7.37 | 33.7  | matrix-remodelling associated 7                                |
| Col4a6        | 7.33 | 2.0   | collagen type IV alpha 6 chain                                 |
| Pde10a        | 7.33 | 2.7   | phosphodiesterase 10A                                          |

|               |      |       |                                                      |
|---------------|------|-------|------------------------------------------------------|
| Ormdl3        | 7.30 | 42.6  | ORMDL sphingolipid biosynthesis regulator 3          |
| Shroom3       | 7.30 | 51.0  | shroom family member 3                               |
| Golm1         | 7.29 | 8.8   | golgi membrane protein 1                             |
| 2010111I01Rik | 7.26 | 11.8  | Aopep; Aminopeptidase O (Putative)                   |
| Emp3          | 7.21 | 20.4  | epithelial membrane protein 3                        |
| Iqgap2        | 7.21 | 106.9 | IQ motif containing GTPase activating protein 2      |
| Lym9          | 7.16 | 8.0   | LYR motif containing 9                               |
| Tlr7          | 7.15 | 2.6   | toll like receptor 7                                 |
| Bhlhe41       | 7.14 | 13.1  | basic helix-loop-helix family, member e41            |
| Ptger4        | 7.14 | 5.5   | prostaglandin E receptor 4                           |
| Sox5          | 7.14 | 3.0   | SRY-box transcription factor 5                       |
| Septin11      | 7.10 | 136.5 | septin 11                                            |
| Slc31a2       | 7.10 | 36.1  | solute carrier family 31 member 2                    |
| Inhbb         | 7.08 | 7.3   | inhibin subunit beta B                               |
| Mycl          | 7.06 | 4.0   | MYCL proto-oncogene, bHLH transcription factor       |
| Sptb          | 7.04 | 5.3   | spectrin beta, erythrocytic                          |
| Bambi         | 6.96 | 3.5   | BMP and activin membrane bound inhibitor             |
| Pitpnm3       | 6.96 | 6.1   | PITPNM family member 3                               |
| Stx11         | 6.93 | 3.0   | syntaxin 11                                          |
| Mertk         | 6.93 | 125.2 | MER proto-oncogene, tyrosine kinase                  |
| Tppp          | 6.90 | 8.9   | tubulin polymerization promoting protein             |
| Cdr2l         | 6.88 | 10.8  | cerebellar degeneration related protein 2 like       |
| Syt17         | 6.85 | 9.3   | synaptotagmin 17                                     |
| Ankrd1        | 6.84 | 7.7   | ankyrin repeat domain 1                              |
| Scx           | 6.83 | 13.8  | scleraxis bHLH transcription factor                  |
| Eif3m         | 6.80 | 64.7  | eukaryotic translation initiation factor 3 subunit M |
| Arntl         | 6.79 | 1.7   | aryl hydrocarbon receptor nuclear translocator like  |
| Pmepa1        | 6.75 | 52.1  | prostate transmembrane protein, androgen induced 1   |
| Pbx2          | 6.73 | 85.4  | PBX homeobox 2                                       |
| Rnf150        | 6.71 | 4.6   | ring finger protein 150                              |
| Arid5a        | 6.71 | 1.9   | AT-rich interaction domain 5A                        |
| Lrtm2         | 6.64 | 4.8   | leucine rich repeats and transmembrane domains 2     |
| Dusp10        | 6.64 | 6.8   | dual specificity phosphatase 10                      |
| 9930012K11Rik | 6.62 | 2.5   | C8orf58; chromosome 8 open reading frame 58          |
| St3gal6       | 6.62 | 15.2  | ST3 beta-galactoside alpha-2,3-sialyltransferase 6   |
| Tns2          | 6.60 | 307.5 | tensin 2                                             |
| Med12l        | 6.59 | 2.1   | mediator complex subunit 12L                         |
| Gulp1         | 6.57 | 5.4   | GULP PTB domain containing engulfment adaptor 1      |
| Parva         | 6.57 | 117.9 | parvin alpha                                         |
| Tdrkh         | 6.57 | 2.4   | tudor and KH domain containing                       |
| Gpx8          | 6.46 | 27.6  | glutathione peroxidase 8 (putative)                  |
| Colec12       | 6.45 | 27.9  | collectin subfamily member 12                        |
| Elf4          | 6.43 | 11.5  | E74 like ETS transcription factor 4                  |
| Tmem159       | 6.42 | 19.5  | transmembrane protein 159                            |
| Myo1d         | 6.41 | 94.7  | myosin ID                                            |
| Maml3         | 6.36 | 15.2  | mastermind like transcriptional coactivator 3        |
| Myof          | 6.35 | 29.2  | myoferlin                                            |
| Creb3l1       | 6.34 | 26.2  | cAMP responsive element binding protein 3 like 1     |
| Mrc2          | 6.30 | 25.4  | mannose receptor C type 2                            |
| Vegfa         | 6.27 | 310.5 | vascular endothelial growth factor A                 |

|          |      |       |                                                                |
|----------|------|-------|----------------------------------------------------------------|
| Ak1      | 6.24 | 48.0  | adenylate kinase 1                                             |
| Dock11   | 6.23 | 2.5   | dedicator of cytokinesis 11                                    |
| Col4a3   | 6.19 | 222.8 | collagen type IV alpha 3 chain                                 |
| Col1a2   | 6.16 | 28.6  | collagen type I alpha 2 chain                                  |
| Reck     | 6.14 | 7.5   | reversion inducing cysteine rich protein with kazal motifs     |
| Lrrc20   | 6.13 | 5.2   | leucine rich repeat containing 20                              |
| Ccdc167  | 6.13 | 2.5   | coiled-coil domain containing 167                              |
| Arhgap24 | 6.09 | 203.3 | Rho GTPase activating protein 24                               |
| Mob2     | 6.08 | 14.5  | MOB kinase activator 2                                         |
| Ldlrap1  | 6.07 | 24.4  | low density lipoprotein receptor adaptor protein 1             |
| Vopp1    | 6.06 | 4.6   | VOPP1 WW domain binding protein                                |
| Lrch1    | 6.05 | 21.6  | leucine rich repeats and calponin homology domain containing 1 |
| Otud7b   | 6.04 | 73.1  | OTU deubiquitinase 7B                                          |
| Ston2    | 6.01 | 36.9  | stonin 2                                                       |
| Fryl     | 5.99 | 45.3  | FRY like transcription coactivator                             |
| Samd4    | 5.97 | 10.1  | sterile alpha motif domain containing 4                        |
| Ildr2    | 5.96 | 118.6 | immunoglobulin like domain containing receptor 2               |
| Nxn      | 5.96 | 16.5  | nucleoredoxin                                                  |
| Plxnb1   | 5.93 | 31.4  | plexin B1                                                      |
| Lrrc10b  | 5.92 | 1.6   | leucine rich repeat containing 10B                             |
| Ctnnal1  | 5.88 | 15.6  | catenin alpha like 1                                           |
| Myadm    | 5.87 | 4.3   | myeloid associated differentiation marker                      |
| Disp1    | 5.85 | 6.9   | dispatched RND transporter family member 1                     |
| Gpc1     | 5.84 | 27.6  | glypican 1                                                     |
| Myl12a   | 5.82 | 140.3 | myosin, light chain 12A, regulatory, non-sarcomeric            |
| Gpx7     | 5.81 | 2.2   | glutathione peroxidase 7                                       |
| Samd12   | 5.80 | 11.0  | sterile alpha motif domain containing 12                       |
| Sema5a   | 5.80 | 36.2  | semaphorin 5A                                                  |
| Dtna     | 5.76 | 1.9   | dystrobrevin alpha                                             |
| Psd3     | 5.72 | 8.0   | pleckstrin and Sec7 domain containing 3                        |
| Kank2    | 5.69 | 37.5  | KN motif and ankyrin repeat domains 2                          |
| Pld1     | 5.66 | 7.7   | phospholipase D1                                               |
| Ccdc80   | 5.65 | 4.4   | coiled-coil domain containing 80                               |
| Aif1l    | 5.62 | 216.2 | allograft inflammatory factor 1 like                           |
| Dse      | 5.61 | 7.2   | dermatan sulfate epimerase                                     |
| Tspan13  | 5.61 | 18.9  | tetraspanin 13                                                 |
| Sdc4     | 5.60 | 659.6 | syndecan 4                                                     |
| Nfkbie   | 5.58 | 6.6   | NFKB inhibitor epsilon                                         |
| Steap3   | 5.56 | 5.9   | STEAP3 metalloredutase                                         |
| Tpm1     | 5.56 | 61.9  | tropomyosin 1, alpha                                           |
| Dusp15   | 5.54 | 4.9   | dual specificity phosphatase 15                                |
| Osbpl5   | 5.53 | 68.2  | oxysterol binding protein like 5                               |
| Gsdmd    | 5.49 | 8.3   | gasdermin D                                                    |
| Lix1l    | 5.49 | 11.0  | limb and CNS expressed 1 like                                  |
| C1ra     | 5.40 | 20.5  | C1r; complement C1r                                            |
| Alcam    | 5.38 | 17.2  | activated leukocyte cell adhesion molecule                     |
| Col18a1  | 5.38 | 176.0 | collagen type XVIII alpha 1 chain                              |
| Ncam1    | 5.31 | 3.8   | neural cell adhesion molecule 1                                |
| Dag1     | 5.31 | 147.8 | dystroglycan 1                                                 |
| Plekha2  | 5.29 | 19.1  | pleckstrin homology domain containing A2                       |

|           |      |       |                                                            |
|-----------|------|-------|------------------------------------------------------------|
| Filip1    | 5.29 | 5.3   | filamin A interacting protein 1                            |
| Arhgap44  | 5.29 | 15.2  | Rho GTPase activating protein 44                           |
| Dusp3     | 5.29 | 130.1 | dual specificity phosphatase 3                             |
| Gab2      | 5.26 | 39.3  | GRB2 associated binding protein 2                          |
| Eml1      | 5.25 | 10.8  | EMAP like 1                                                |
| Nek1      | 5.24 | 11.7  | NIMA related kinase 1                                      |
| Fgfr1     | 5.22 | 26.5  | fibroblast growth factor receptor 1                        |
| Axl       | 5.21 | 40.9  | AXL receptor tyrosine kinase                               |
| Apba1     | 5.21 | 3.6   | amyloid beta precursor protein binding family A member 1   |
| Sipa1l2   | 5.17 | 15.3  | signal induced proliferation associated 1 like 2           |
| Atp8b2    | 5.16 | 7.8   | ATPase phospholipid transporting 8B2                       |
| Il18      | 5.13 | 6.4   | interleukin 18                                             |
| Slco2a1   | 5.13 | 12.6  | solute carrier organic anion transporter family member 2A1 |
| Tnfrsf12a | 5.09 | 29.5  | TNF receptor superfamily member 12A                        |
| Ptk7      | 5.08 | 11.8  | protein tyrosine kinase 7 (inactive)                       |
| Mdfic     | 5.07 | 11.0  | MyoD family inhibitor domain containing                    |
| Atoh8     | 5.04 | 12.2  | atonal bHLH transcription factor 8                         |
| Cerk      | 5.03 | 25.4  | ceramide kinase                                            |
| P3h1      | 5.01 | 11.0  | prolyl 3-hydroxylase 1                                     |
| Tmem98    | 5.01 | 11.9  | transmembrane protein 98                                   |
| Sirpa     | 4.99 | 62.3  | signal regulatory protein alpha                            |
| Gsta4     | 4.99 | 70.7  | glutathione S-transferase, alpha 4                         |
| Antxr2    | 4.97 | 5.5   | ANTXR cell adhesion molecule 2                             |
| Elmo2     | 4.96 | 25.8  | engulfment and cell motility 2                             |
| Casz1     | 4.94 | 19.4  | castor zinc finger 1                                       |
| Slc27a3   | 4.94 | 5.2   | solute carrier family 27 member 3                          |
| Fosl2     | 4.94 | 28.0  | FOS like 2, AP-1 transcription factor subunit              |
| Cdon      | 4.93 | 5.4   | cell adhesion associated, oncogene regulated               |
| Ccdc73    | 4.92 | 2.8   | coiled-coil domain containing 73                           |
| Nck2      | 4.91 | 39.6  | NCK adaptor protein 2                                      |
| Hist1h2bf | 4.90 | 1.6   | H2bc7; H2B clustered histone 7                             |
| Fndc3b    | 4.89 | 30.6  | fibronectin type III domain containing 3B                  |
| Vamp2     | 4.87 | 95.6  | vesicle associated membrane protein 2                      |
| Tmsb10    | 4.84 | 131.3 | thymosin, beta 10                                          |
| Ajuba     | 4.82 | 41.7  | ajuba LIM protein                                          |
| Rassf2    | 4.82 | 6.8   | Ras association domain family member 2                     |
| Nbdy      | 4.81 | 5.9   | negative regulator of P-body association                   |
| Bnip2     | 4.81 | 23.7  | BCL2 interacting protein 2                                 |
| Hoxc6     | 4.81 | 40.4  | homeobox C6                                                |
| Tspan17   | 4.80 | 9.1   | tetraspanin 17                                             |
| Rassf8    | 4.78 | 72.7  | Ras association domain family member 8                     |
| Tnfaip2   | 4.77 | 25.3  | TNF alpha induced protein 2                                |
| Armcx3    | 4.75 | 7.1   | armadillo repeat containing X-linked 3                     |
| Man1a2    | 4.75 | 58.1  | mannosidase alpha class 1A member 2                        |
| Epb41l5   | 4.73 | 41.6  | erythrocyte membrane protein band 4.1 like 5               |
| Trib2     | 4.72 | 109.1 | tribbles pseudokinase 2                                    |
| Fat1      | 4.72 | 73.9  | FAT atypical cadherin 1                                    |
| Amigo2    | 4.72 | 4.9   | adhesion molecule with Ig like domain 2                    |
| Zfp462    | 4.71 | 20.4  | zinc finger protein 462                                    |
| Ifitm2    | 4.69 | 98.4  | interferon induced transmembrane protein 2                 |

|               |      |       |                                                                            |
|---------------|------|-------|----------------------------------------------------------------------------|
| Ppfibp2       | 4.69 | 7.5   | PPFIA binding protein 2                                                    |
| E330009J07Rik | 4.68 | 18.5  | Dennd11; DENN domain containing 11                                         |
| Wsb2          | 4.66 | 109.1 | WD repeat and SOCS box containing 2                                        |
| Dnase1l1      | 4.66 | 8.7   | deoxyribonuclease 1 like 1                                                 |
| Rnasel        | 4.66 | 5.6   | ribonuclease L                                                             |
| Gm9844        | 4.65 | 30.1  | thymosin, beta 10 pseudogene                                               |
| Calm2         | 4.64 | 352.4 | calmodulin 2                                                               |
| Ago4          | 4.64 | 3.1   | argonaute RISC component 4                                                 |
| F2r           | 4.63 | 61.6  | coagulation factor II thrombin receptor                                    |
| Hip1          | 4.61 | 10.2  | huntingtin interacting protein 1                                           |
| Hivep2        | 4.61 | 22.4  | HIVEP zinc finger 2                                                        |
| Slc37a2       | 4.58 | 1.7   | solute carrier family 37 member 2                                          |
| Slc38a4       | 4.56 | 2.7   | solute carrier family 38 member 4                                          |
| Itpril2       | 4.56 | 31.4  | ITPRIP like 2                                                              |
| Kctd11        | 4.56 | 12.1  | potassium channel tetramerization domain containing 11                     |
| Mapt          | 4.54 | 161.7 | microtubule associated protein tau                                         |
| Epha2         | 4.51 | 10.4  | EPH receptor A2                                                            |
| Svep1         | 4.49 | 8.4   | sushi, von Willebrand factor type A, EGF and pentraxin domain containing 1 |
| A530032D15Rik | 4.47 | 3.6   | C130026I21Rik; RIKEN cDNA C130026I21 gene                                  |
| Rcsd1         | 4.46 | 8.9   | RCSD domain containing 1                                                   |
| Lpin2         | 4.46 | 43.3  | lipin 2                                                                    |
| Btg2          | 4.46 | 27.2  | BTG anti-proliferation factor 2                                            |
| Unc5c         | 4.46 | 3.7   | unc-5 netrin receptor C                                                    |
| Unc13b        | 4.44 | 3.4   | unc-13 homolog B                                                           |
| Dock4         | 4.43 | 9.7   | dedicator of cytokinesis 4                                                 |
| Arhgef16      | 4.39 | 66.1  | Rho guanine nucleotide exchange factor 16                                  |
| Megf8         | 4.39 | 38.0  | multiple EGF like domains 8                                                |
| Arhgap19      | 4.37 | 1.9   | Rho GTPase activating protein 19                                           |
| Aldh1a2       | 4.36 | 9.5   | aldehyde dehydrogenase 1 family member A2                                  |
| Hoxc4         | 4.34 | 6.5   | homeobox C4                                                                |
| Emilin1       | 4.34 | 15.1  | elastin microfibril interfacier 1                                          |
| Arhgef10      | 4.34 | 7.8   | Rho guanine nucleotide exchange factor 10                                  |
| Lgalsl        | 4.31 | 18.8  | galectin like                                                              |
| Alg14         | 4.30 | 6.8   | ALG14 UDP-N-acetylglucosaminyltransferase subunit                          |
| Cadm4         | 4.30 | 59.2  | cell adhesion molecule 4                                                   |
| Map4          | 4.29 | 45.0  | microtubule associated protein 4                                           |
| Cttnbp2       | 4.29 | 12.2  | cortactin binding protein 2                                                |
| Pde3b         | 4.29 | 8.0   | phosphodiesterase 3B                                                       |
| Arhgef12      | 4.29 | 207.2 | Rho guanine nucleotide exchange factor 12                                  |
| Cables1       | 4.28 | 13.4  | Cdk5 and Abl enzyme substrate 1                                            |
| Scd2          | 4.26 | 63.3  | stearoyl-Coenzyme A desaturase 2                                           |
| Fam131a       | 4.25 | 3.5   | family with sequence similarity 131 member A                               |
| Mast4         | 4.25 | 11.6  | microtubule associated serine/threonine kinase family member 4             |
| Nfe2l1        | 4.23 | 197.1 | nuclear factor, erythroid 2 like 1                                         |
| Ston1         | 4.23 | 44.8  | stonin 1                                                                   |
| Cyr61         | 4.22 | 32.2  | Ccn1; cellular communication network factor 1                              |
| Atf3          | 4.22 | 3.3   | activating transcription factor 3                                          |
| 5730409E04Rik | 4.22 | 8.1   | C1orf216; chromosome 1 open reading frame 216                              |
| Myl6          | 4.22 | 135.4 | myosin light chain 6                                                       |
| Fa2h          | 4.21 | 14.7  | fatty acid 2-hydroxylase                                                   |

|               |      |       |                                                                   |
|---------------|------|-------|-------------------------------------------------------------------|
| Wtip          | 4.18 | 18.7  | WT1 interacting protein                                           |
| Gm527         | 4.15 | 2.4   | C14orf28; chromosome 14 open reading frame 28                     |
| Tead4         | 4.14 | 3.7   | TEA domain transcription factor 4                                 |
| Klc1          | 4.13 | 31.6  | kinesin light chain 1                                             |
| Fchsd2        | 4.13 | 7.0   | FCH and double SH3 domains 2                                      |
| Rab13         | 4.11 | 11.8  | RAB13, member RAS oncogene family                                 |
| 4930523C07Rik | 4.11 | 4.1   | KIAA0040                                                          |
| Ucp2          | 4.10 | 58.6  | uncoupling protein 2                                              |
| Crim1         | 4.05 | 89.1  | cysteine rich transmembrane BMP regulator 1                       |
| S100a11       | 4.05 | 354.7 | S100 calcium binding protein A11                                  |
| Mxra8         | 4.05 | 14.9  | matrix remodeling associated 8                                    |
| Efhd2         | 4.05 | 70.3  | EF-hand domain family member D2                                   |
| Abca5         | 4.02 | 6.1   | ATP binding cassette subfamily A member 5                         |
| Map1b         | 4.02 | 6.9   | microtubule associated protein 1B                                 |
| Mllt6         | 4.00 | 115.8 | MLLT6, PHD finger containing                                      |
| Fgfr2         | 3.99 | 7.9   | fibroblast growth factor receptor 2                               |
| Btg3          | 3.99 | 9.8   | BTG anti-proliferation factor 3                                   |
| Stat1         | 3.98 | 10.1  | signal transducer and activator of transcription 1                |
| Armcx1        | 3.98 | 4.6   | armadillo repeat containing X-linked 1                            |
| Arfgef3       | 3.97 | 4.6   | ARFGEF family member 3                                            |
| Hivep1        | 3.96 | 47.5  | HIVEP zinc finger 1                                               |
| Scrn1         | 3.96 | 1.9   | secernin 1                                                        |
| Myh9          | 3.96 | 123.1 | myosin heavy chain 9                                              |
| Smad6         | 3.95 | 20.0  | SMAD family member 6                                              |
| Col4a5        | 3.94 | 21.3  | collagen type IV alpha 5 chain                                    |
| Tmem229b      | 3.94 | 4.1   | transmembrane protein 229B                                        |
| Bcar3         | 3.94 | 22.6  | BCAR3 adaptor protein, NSP family member                          |
| Mustn1        | 3.93 | 8.3   | musculoskeletal, embryonic nuclear protein 1                      |
| Arrb1         | 3.92 | 36.6  | arrestin beta 1                                                   |
| Qk            | 3.89 | 60.8  | QKI, KH domain containing RNA binding                             |
| Uck2          | 3.88 | 25.3  | uridine-cytidine kinase 2                                         |
| Kank1         | 3.88 | 65.5  | KN motif and ankyrin repeat domains 1                             |
| Hist1h2bg     | 3.88 | 3.5   | H2bc8; H2B clustered histone 8                                    |
| Mpp5          | 3.87 | 60.5  | membrane palmitoylated protein 5                                  |
| Colgalt2      | 3.87 | 8.3   | collagen beta(1-O)galactosyltransferase 2                         |
| Zfp37         | 3.86 | 3.3   | zinc finger protein 37                                            |
| Jun           | 3.85 | 61.6  | Jun proto-oncogene, AP-1 transcription factor subunit             |
| Ptpn21        | 3.84 | 28.1  | protein tyrosine phosphatase non-receptor type 21                 |
| Srf           | 3.83 | 46.0  | serum response factor                                             |
| H2-Q4         | 3.83 | 25.9  | histocompatibility 2, Q region locus 4                            |
| Sec16b        | 3.82 | 2.1   | SEC16 homolog B, endoplasmic reticulum export factor              |
| Pamr1         | 3.82 | 2.5   | peptidase domain containing associated with muscle regeneration 1 |
| Ndn           | 3.82 | 1.8   | neccdin, MAGE family member                                       |
| Mprp          | 3.82 | 52.1  | myosin phosphatase Rho interacting protein                        |
| Tmbim1        | 3.81 | 4.9   | transmembrane BAX inhibitor motif containing 1                    |
| Abr           | 3.81 | 30.5  | ABR activator of RhoGEF and GTPase                                |
| Plekha5       | 3.80 | 15.4  | pleckstrin homology domain containing A5                          |
| Tenm3         | 3.80 | 2.2   | teneurin transmembrane protein 3                                  |
| Tuba1a        | 3.80 | 25.2  | tubulin alpha 1a                                                  |
| Dtx4          | 3.79 | 16.1  | deltex E3 ubiquitin ligase 4                                      |

|          |      |       |                                                                    |
|----------|------|-------|--------------------------------------------------------------------|
| Npas2    | 3.79 | 2.5   | neuronal PAS domain protein 2                                      |
| Nrep     | 3.77 | 5.4   | neuronal regeneration related protein                              |
| Micu1    | 3.77 | 19.0  | mitochondrial calcium uptake 1                                     |
| Grk5     | 3.77 | 14.6  | G protein-coupled receptor kinase 5                                |
| Zbtb42   | 3.76 | 7.6   | zinc finger and BTB domain containing 42                           |
| Prkci    | 3.75 | 26.0  | protein kinase C iota                                              |
| Actn4    | 3.75 | 109.0 | actinin alpha 4                                                    |
| Crtc1    | 3.75 | 10.9  | CREB regulated transcription coactivator 1                         |
| Hdgfl3   | 3.72 | 3.1   | HDGF like 3                                                        |
| St3gal3  | 3.71 | 72.3  | ST3 beta-galactoside alpha-2,3-sialyltransferase 3                 |
| Spats2l  | 3.70 | 8.3   | spermatogenesis associated serine rich 2 like                      |
| Amotl2   | 3.69 | 91.5  | angiominin like 2                                                  |
| Inpp4a   | 3.69 | 7.5   | inositol polyphosphate-4-phosphatase type I A                      |
| Plekhg2  | 3.69 | 13.0  | pleckstrin homology and RhoGEF domain containing G2                |
| Pnmal2   | 3.68 | 9.5   | PNMA-like 2                                                        |
| Plekhh3  | 3.67 | 10.1  | pleckstrin homology, MyTH4 and FERM domain containing H3           |
| Chst14   | 3.67 | 3.2   | carbohydrate sulfotransferase 14                                   |
| Kctd15   | 3.65 | 7.4   | potassium channel tetramerization domain containing 15             |
| Ppp1r9b  | 3.65 | 72.8  | protein phosphatase 1 regulatory subunit 9B                        |
| Atp1b2   | 3.64 | 13.6  | ATPase Na <sup>+</sup> /K <sup>+</sup> transporting subunit beta 2 |
| Sh3bp5l  | 3.62 | 24.1  | SH3 binding domain protein 5 like                                  |
| Pla2g7   | 3.60 | 7.0   | phospholipase A2 group VII                                         |
| Luzp1    | 3.60 | 46.8  | leucine zipper protein 1                                           |
| Zfp13    | 3.60 | 5.8   | zinc finger protein 13                                             |
| Tjap1    | 3.59 | 18.8  | tight junction associated protein 1                                |
| Pard6b   | 3.56 | 93.0  | par-6 family cell polarity regulator beta                          |
| Adamts15 | 3.56 | 1.5   | ADAMTS like 5                                                      |
| Cry1     | 3.56 | 3.9   | cryptochrome circadian regulator 1                                 |
| Gpsm2    | 3.56 | 3.7   | G protein signaling modulator 2                                    |
| Mafk     | 3.55 | 30.3  | MAF bZIP transcription factor K                                    |
| Dlc1     | 3.55 | 15.2  | DLC1 Rho GTPase activating protein                                 |
| Zfp651   | 3.55 | 8.3   | zinc finger protein 651                                            |
| Large1   | 3.54 | 6.3   | ARGE xylosyl- and glucuronyltransferase 1                          |
| Ahnak    | 3.53 | 72.7  | AHNAK nucleoprotein                                                |
| Adamts14 | 3.53 | 2.7   | ADAMTS like 4                                                      |
| Aebp1    | 3.53 | 49.6  | AE binding protein 1                                               |
| Slc39a6  | 3.52 | 4.6   | solute carrier family 39 member 6                                  |
| Ehd4     | 3.52 | 50.6  | EH domain containing 4                                             |
| Kif5b    | 3.52 | 69.5  | kinesin family member 5B                                           |
| Pmp22    | 3.51 | 11.6  | peripheral myelin protein 22                                       |
| Arhgap33 | 3.51 | 2.9   | Rho GTPase activating protein 33                                   |
| Esyt1    | 3.50 | 6.2   | extended synaptotagmin 1                                           |
| Rarb     | 3.49 | 3.0   | retinoic acid receptor beta                                        |
| Kif3c    | 3.48 | 4.9   | kinesin family member 3C                                           |
| Sh3pxd2a | 3.46 | 22.3  | SH3 and PX domains 2A                                              |
| Borcs6   | 3.45 | 14.4  | BLOC-1 related complex subunit 6                                   |
| Hoxc5    | 3.41 | 2.6   | homeobox C5                                                        |
| Rab7b    | 3.40 | 1.9   | RAB7B, member RAS oncogene family                                  |
| Pqlc3    | 3.40 | 2.0   | PQ loop repeat containing                                          |
| Ankrd40  | 3.39 | 82.8  | ankyrin repeat domain 40                                           |



|          |      |       |                                                              |
|----------|------|-------|--------------------------------------------------------------|
| Gm10509  | 3.39 | 1.9   | predicted gene 10509                                         |
| Synj2    | 3.39 | 3.3   | synaptojanin 2                                               |
| Parp4    | 3.38 | 23.8  | poly(ADP-ribose) polymerase family member 4                  |
| Igf2bp1  | 3.38 | 3.1   | insulin like growth factor 2 mRNA binding protein 1          |
| Rragb    | 3.37 | 1.9   | Ras related GTP binding B                                    |
| Palld    | 3.37 | 70.8  | palladin, cytoskeletal associated protein                    |
| Kremen1  | 3.37 | 21.1  | kringle containing transmembrane protein 1                   |
| Vasn     | 3.36 | 24.3  | vasorin                                                      |
| Abca2    | 3.36 | 51.2  | ATP binding cassette subfamily A member 2                    |
| P3h2     | 3.35 | 93.3  | prolyl 3-hydroxylase 2                                       |
| Htra1    | 3.35 | 105.8 | HtrA serine peptidase 1                                      |
| Tssc4    | 3.34 | 20.0  | tumor suppressing subtransferable candidate 4                |
| Emp2     | 3.34 | 8.1   | epithelial membrane protein 2                                |
| Tubb2a   | 3.33 | 33.6  | tubulin beta 2A class IIa                                    |
| Relb     | 3.33 | 5.0   | RELB proto-oncogene, NF-kB subunit                           |
| Rras     | 3.33 | 36.3  | RAS related                                                  |
| Zbtb46   | 3.31 | 5.4   | zinc finger and BTB domain containing 46                     |
| Igfbp2   | 3.31 | 2.1   | insulin like growth factor binding protein 2                 |
| Slc44a2  | 3.30 | 11.8  | solute carrier family 44 member 2                            |
| Mlkl     | 3.30 | 2.9   | mixed lineage kinase domain like pseudokinase                |
| Rhbdf2   | 3.30 | 7.9   | rhomboid 5 homolog 2                                         |
| Mtch1    | 3.30 | 162.7 | mitochondrial carrier 1                                      |
| Ephx1    | 3.29 | 47.8  | epoxide hydrolase 1                                          |
| Aagab    | 3.29 | 19.2  | alpha and gamma adaptin binding protein                      |
| Dbn2     | 3.29 | 1.8   | dysbindin domain containing 2                                |
| Faim     | 3.27 | 3.0   | Fas apoptotic inhibitory molecule                            |
| Natd1    | 3.26 | 26.7  | N-acetyltransferase domain containing 1                      |
| AI597479 | 3.26 | 9.3   | C2orf49; chromosome 2 open reading frame 49                  |
| Cnp      | 3.25 | 5.7   | 2',3'-cyclic nucleotide 3' phosphodiesterase                 |
| Rras2    | 3.25 | 21.7  | RAS related 2                                                |
| Actn1    | 3.24 | 13.0  | actinin alpha 1                                              |
| Cryab    | 3.23 | 161.6 | crystallin alpha B                                           |
| Nkd1     | 3.22 | 3.2   | NKD inhibitor of WNT signaling pathway 1                     |
| Prmt2    | 3.22 | 7.6   | protein arginine methyltransferase 2                         |
| Utrn     | 3.22 | 23.9  | utrophin                                                     |
| Arf6     | 3.21 | 186.2 | ADP ribosylation factor 6                                    |
| Fkbp7    | 3.20 | 4.8   | FKBP prolyl isomerase 7                                      |
| Il34     | 3.19 | 11.9  | interleukin 34                                               |
| Tgfbr3   | 3.19 | 35.3  | transforming growth factor beta receptor 3                   |
| Itgb1    | 3.19 | 137.1 | integrin subunit beta 1                                      |
| Iqgap1   | 3.19 | 15.1  | IQ motif containing GTPase activating protein 1              |
| Zdhhc14  | 3.17 | 5.7   | zinc finger DHHC-type palmitoyltransferase 14                |
| Gm14403  | 3.17 | 3.2   | predicted gene 14403                                         |
| Cd2ap    | 3.16 | 104.6 | CD2 associated protein                                       |
| Bmpr1a   | 3.15 | 33.6  | bone morphogenetic protein receptor type 1A                  |
| Ptgds    | 3.15 | 4.2   | prostaglandin D2 synthase                                    |
| Ensa     | 3.14 | 23.7  | endosulfine alpha                                            |
| Septin10 | 3.13 | 9.3   | septin 10                                                    |
| Srgap2   | 3.13 | 12.2  | SLIT-ROBO Rho GTPase activating protein 2                    |
| Serpib6a | 3.12 | 6.5   | serine (or cysteine) peptidase inhibitor, clade B, member 6a |

|         |      |      |                                                                                |
|---------|------|------|--------------------------------------------------------------------------------|
| Ptpn12  | 3.12 | 25.2 | protein tyrosine phosphatase non-receptor type 12                              |
| Ifngr1  | 3.12 | 19.4 | interferon gamma receptor 1                                                    |
| Rbfox2  | 3.12 | 13.0 | RNA binding fox-1 homolog 2                                                    |
| Sash1   | 3.11 | 48.9 | SAM and SH3 domain containing 1                                                |
| Cd151   | 3.11 | 58.9 | CD151 molecule (Raph blood group)                                              |
| Rab6b   | 3.11 | 22.9 | RAB6B, member RAS oncogene family                                              |
| Irgm2   | 3.11 | 33.1 | immunity-related GTPase family M member 2                                      |
| Cbfa2t3 | 3.11 | 11.7 | CBFA2/RUNX1 partner transcriptional co-repressor 3                             |
| Specc1l | 3.10 | 16.1 | sperm antigen with calponin homology and coiled-coil domains 1 like            |
| Vamp4   | 3.10 | 8.2  | vesicle associated membrane protein 4                                          |
| Cbarp   | 3.10 | 3.2  | calcium channel, voltage-dependent, beta subunit associated regulatory protein |
| Slain2  | 3.10 | 39.7 | SLAIN motif family member 2                                                    |
| Dennd5a | 3.10 | 40.8 | DENN domain containing 5A                                                      |
| Tmem164 | 3.08 | 19.1 | transmembrane protein 164                                                      |
| S100a13 | 3.08 | 24.2 | S100 calcium binding protein A13                                               |
| Dcbld2  | 3.08 | 5.8  | discoidin, CUB and LCCL domain containing 2                                    |
| Smim13  | 3.08 | 9.2  | small integral membrane protein 13                                             |
| Nab1    | 3.07 | 42.4 | NGFI-A binding protein 1                                                       |
| Fam81a  | 3.07 | 30.0 | family with sequence similarity 81 member A                                    |
| Parp12  | 3.07 | 12.1 | poly(ADP-ribose) polymerase family member 12                                   |
| Syne1   | 3.07 | 10.8 | spectrin repeat containing nuclear envelope protein 1                          |
| Agap1   | 3.06 | 58.9 | ArfGAP with GTPase domain, ankyrin repeat and PH domain 1                      |
| Gnao1   | 3.06 | 2.3  | G protein subunit alpha o1                                                     |
| Pea15a  | 3.05 | 40.0 | phosphoprotein enriched in astrocytes 15A                                      |
| Socs2   | 3.05 | 2.6  | suppressor of cytokine signaling 2                                             |
| Lzts2   | 3.05 | 53.8 | leucine zipper tumor suppressor 2                                              |
| Zc4h2   | 3.04 | 3.7  | zinc finger C4H2-type containing                                               |
| Sh3bp4  | 3.03 | 21.6 | SH3 domain binding protein 4                                                   |
| Nars2   | 3.03 | 3.6  | asparaginyl-tRNA synthetase 2, mitochondrial                                   |
| Zfp772  | 3.03 | 2.1  | zinc finger protein 772                                                        |
| Megf9   | 3.02 | 8.2  | multiple EGF like domains 9                                                    |
| Nedd9   | 3.01 | 28.5 | neural precursor cell expressed, developmentally down-regulated 9              |
| Rit1    | 3.01 | 17.8 | Ras like without CAAX 1                                                        |
| Dok1    | 3.01 | 3.9  | docking protein 1                                                              |
| Zfp667  | 3.01 | 1.5  | zinc finger protein 667                                                        |
| Smo     | 3.00 | 49.5 | smoothened, frizzled class receptor                                            |
