# Supplementary material
Source: publisher figshare collection journal article supplement (https://diabetesjournals.figshare.com/articles/dataset/_/14888034)
Supplement: Supplementary file 10 [file 1]

|                    | Category | Term                                                                            | Count | PValue |
|--------------------|----------|---------------------------------------------------------------------------------|-------|--------|
| D1-3w-up-1         | KEGG     | mmu04530:Tight junction                                                         | 7     | 0.001  |
| D1-3w-up-2         | GO_MF    | GO:0019904~protein domain specific binding                                      | 8     | 0.002  |
| D1-3w-up-3         | GO_MF    | GO:0044822~poly(A) RNA binding                                                  | 7     | 0.018  |
| D1-3w-up-4         | GO_BP    | GO:0014070~response to organic cyclic compound                                  | 3     | 0.029  |
| D1-3w-up-5         | GO_BP    | GO:0032869~cellular response to insulin stimulus                                | 4     | 0.039  |
| D1-3w-up-6         | GO_MF    | GO:0005543~phospholipid binding                                                 | 5     | 0.046  |
| D1-3w-up-7         | GO_MF    | GO:0005525~GTP binding                                                          | 7     | 0.048  |
| D1-3w-up-8         | GO_BP    | GO:0072659~protein localization to plasma membrane                              | 3     | 0.054  |
| D1-3w-up-9         | KEGG     | mmu04670:Leukocyte transendothelial migration                                   | 4     | 0.059  |
| D1-3w-up-10        | GO_MF    | GO:0005509~calcium ion binding                                                  | 9     | 0.061  |
| D1-3w-up-11        | GO_MF    | GO:0032403~protein complex binding                                              | 6     | 0.076  |
| D1-3w-up-12        | GO_BP    | GO:0070830~bicellular tight junction assembly                                   | 3     | 0.083  |
| D1-3w-up-13        | GO_MF    | GO:0047485~protein N-terminus binding                                           | 3     | 0.085  |
| D1-3w-up-14        | GO_BP    | GO:0007155~cell adhesion                                                        | 8     | 0.090  |
| D1-3w-up-15        | KEGG     | mmu04910:Insulin signaling pathway                                              | 3     | 0.094  |
| D1-24w-up-1        | KEGG     | mmu05168:Herpes simplex infection                                               | 4     | 0.046  |
| D1-24w-up-2        | GO_BP    | GO:0007017~microtubule-based process                                            | 3     | 0.086  |
| D1-24w-up-3        | GO_BP    | GO:0045773~positive regulation of axon extension                                | 3     | 0.086  |
| D1-24w-up-4        | GO_MF    | GO:0042826~histone deacetylase binding                                          | 3     | 0.087  |
| D1-3w-up-only-1    | KEGG     | mmu04530:Tight junction                                                         | 7     | 0.000  |
| D1-3w-up-only-2    | GO_MF    | GO:0019904~protein domain specific binding                                      | 7     | 0.002  |
| D1-3w-up-only-3    | GO_MF    | GO:0005543~phospholipid binding                                                 | 5     | 0.016  |
| D1-3w-up-only-4    | KEGG     | mmu04670:Leukocyte transendothelial migration                                   | 4     | 0.026  |
| D1-3w-up-only-5    | GO_BP    | GO:0072659~protein localization to plasma membrane                              | 3     | 0.028  |
| D1-3w-up-only-6    | GO_BP    | GO:0070830~bicellular tight junction assembly                                   | 3     | 0.045  |
| D1-3w-up-only-7    | GO_MF    | GO:0047485~protein N-terminus binding                                           | 3     | 0.047  |
| D1-3w-up-only-8    | GO_MF    | GO:0051015~actin filament binding                                               | 5     | 0.064  |
| D1-3w-up-only-9    | GO_MF    | GO:0048365~Rac GTPase binding                                                   | 3     | 0.068  |
| D1-3w-up-only-10   | GO_MF    | GO:0044822~poly(A) RNA binding                                                  | 5     | 0.074  |
| D1-3w-up-only-11   | GO_BP    | GO:0015031~protein transport                                                    | 5     | 0.077  |
| D1-3w-up-only-12   | GO_MF    | GO:0042803~protein homodimerization activity                                    | 7     | 0.084  |
| D1-3w-up-only-13   | GO_MF    | GO:0032403~protein complex binding                                              | 5     | 0.085  |
| D1-3w-up-only-14   | GO_BP    | GO:0043434~response to peptide hormone                                          | 3     | 0.086  |
| D1-3w-up-only-15   | GO_BP    | GO:0050821~protein stabilization                                                | 3     | 0.086  |
| D1-3w-up-only-16   | GO_MF    | GO:0005509~calcium ion binding                                                  | 7     | 0.092  |
| D1-24w-up-only-1   | GO_MF    | GO:0044212~transcription regulatory region DNA binding                          | 4     | 0.076  |
| D1-24w-up-only-2   | GO_BP    | GO:0006366~transcription from RNA polymerase II promoter                        | 3     | 0.082  |
| D1-24w-up-only-3   | KEGG     | mmu04728:Dopaminergic synapse                                                   | 3     | 0.100  |
| D1-3w24w-up-both-1 | GO_MF    | GO:0005525~GTP binding                                                          | 4     | 0.029  |
| D1-3w24w-up-both-2 | GO_BP    | GO:0007599~hemostasis                                                           | 2     | 0.055  |
| D1-3w24w-up-both-3 | GO_MF    | GO:0042605~peptide antigen binding                                              | 2     | 0.076  |
| D1-3w24w-up-both-4 | GO_MF    | GO:0030881~beta-2-microglobulin binding                                         | 2     | 0.076  |
| D1-3w24w-up-both-5 | GO_MF    | GO:0046977~TAP binding                                                          | 2     | 0.076  |
| D1-3w24w-up-both-6 | GO_BP    | GO:0030335~positive regulation of cell migration                                | 3     | 0.077  |
| D1-3w24w-up-both-7 | GO_BP    | GO:0002474~antigen processing and presentation of peptide antigen               | 2     | 0.081  |
| D1-3w24w-up-both-8 | GO_BP    | GO:0007155~cell adhesion                                                        | 4     | 0.088  |
| D1-3w-down-1       | GO_BP    | GO:0072358~cardiovascular system development                                    | 3     | 0.032  |
| D1-3w-down-2       | GO_MF    | GO:0004252~serine-type endopeptidase activity                                   | 4     | 0.040  |
| D1-3w-down-3       | GO_MF    | GO:0005201~extracellular matrix structural constituent                          | 3     | 0.054  |
| D1-3w-down-4       | GO_BP    | GO:0048010~vascular endothelial growth factor receptor signaling pathway        | 3     | 0.060  |
| D1-3w-down-5       | KEGG     | mmu00510:N-Glycan biosynthesis                                                  | 3     | 0.089  |
| D1-3w-down-6       | GO_BP    | GO:0010506~regulation of autophagy                                              | 3     | 0.093  |
| D1-3w-down-7       | GO_BP    | GO:0032836~glomerular basement membrane development                             | 3     | 0.093  |
| D1-24w-down-1      | GO_MF    | GO:0043565~sequence-specific DNA binding                                        | 9     | 0.014  |
| D1-24w-down-2      | GO_BP    | GO:0072112~glomerular visceral epithelial cell differentiation                  | 3     | 0.017  |
| D1-24w-down-3      | GO_BP    | GO:0045893~positive regulation of transcription, DNA-templated                  | 7     | 0.030  |
| D1-24w-down-4      | KEGG     | mmu04024:cAMP signaling pathway                                                 | 5     | 0.046  |
| D1-24w-down-5      | GO_BP    | GO:0051260~protein homooligomerization                                          | 4     | 0.058  |
| D1-24w-down-6      | GO_MF    | GO:0003677~DNA binding                                                          | 11    | 0.063  |
| D1-24w-down-7      | GO_BP    | GO:0045944~positive regulation of transcription from RNA polymerase II promoter | 9     | 0.067  |
| D1-24w-down-8      | GO_MF    | GO:0008146~sulfotransferase activity                                            | 3     | 0.085  |
| D1-24w-down-9      | GO_BP    | GO:0019933~cAMP-mediated signaling                                              | 3     | 0.095  |
| D1-3w-down-only-1  | GO_MF    | GO:0005201~extracellular matrix structural constituent                          | 3     | 0.029  |
| D1-3w-down-only-2  | GO_BP    | GO:0048010~vascular endothelial growth factor receptor signaling pathway        | 3     | 0.033  |
| D1-3w-down-only-3  | GO_BP    | GO:0016525~negative regulation of angiogenesis                                  | 4     | 0.048  |
| D1-3w-down-only-4  | KEGG     | mmu04974:Protein digestion and absorption                                       | 3     | 0.071  |
| D1-3w-down-only-5  | KEGG     | mmu04151:PI3K-Akt signaling pathway                                             | 4     | 0.091  |
| D1-24w-down-only-1 | GO_BP    | GO:0072112~glomerular visceral epithelial cell differentiation                  | 3     | 0.007  |
| D1-24w-down-only-2 | GO_BP    | GO:0045893~positive regulation of transcription, DNA-templated                  | 6     | 0.019  |
| D1-24w-down-only-3 | GO_BP    | GO:0045944~positive regulation of transcription from RNA polymerase II promoter | 7     | 0.065  |
| D1-24w-down-only-4 | GO_BP    | GO:0006468~protein phosphorylation                                              | 5     | 0.066  |
| D1-24w-down-only-5 | GO_MF    | GO:0043565~sequence-specific DNA binding                                        | 6     | 0.076  |
| D1-24w-down-only-6 | GO_MF    | GO:0005524~ATP binding                                                          | 7     | 0.080  |

|                      |       |                                     |   |       |
|----------------------|-------|-------------------------------------|---|-------|
| D1-24w-down-only-7   | KEGG  | mmu04024:cAMP signaling pathway     | 4 | 0.091 |
| D1-24w-down-only-8   | GO_MF | GO:0019901~protein kinase binding   | 4 | 0.094 |
| D1-24w-down-only-9   | GO_BP | GO:0060009~Sertoli cell development | 2 | 0.099 |
| D1-3w24w-down-both-1 | GO_BP | GO:0007626~locomotory behavior      | 2 | 0.095 |

|                                                                           |
|---------------------------------------------------------------------------|
| Genes                                                                     |
| PRKCI, ACTN1, RAB13, MYH9, ACTN4, MPP5, MYL12A                            |
| PRKCI, NDE1, ACTN1, STXBP1, MYH9, IQGAP1, MPP5, CALM2                     |
| H2-Q6, STXBP1, FNDC3B, H2-Q4, MYH9, ACTN4, PARP12                         |
| BTG2, NCF2, EPHX1                                                         |
| PRKCI, STAT1, PDE3B, RAB13                                                |
| PRKCI, HIP1, PSD3, MYOF, PLA2G7                                           |
| TUBB2B, TUBB2A, EHD4, RAB13, IRGM2, RRAS2, UPRT                           |
| STXBP1, RAB13, EMP2                                                       |
| NCF2, ACTN1, ACTN4, MYL12A                                                |
| EHD4, ANXA3, PROS1, ACTN1, S100A13, SVEP1, ACTN4, CALM2, MYL12A           |
| MLKL, PROS1, RARB, ACTN4, IQGAP1, CD2AP                                   |
| RAB13, ACTN4, MPP5                                                        |
| STXBP1, ACTN4, CALM2                                                      |
| TNFRSF12A, SPECC1L, MYH9, SVEP1, EMP2, EMILIN1, ATP1B2, CYR61             |
| PRKCI, PDE3B, CALM2                                                       |
| RNASEL, IFNGR1, H2-Q6, ARNTL                                              |
| TUBB2B, MAP1B, KIF5B                                                      |
| TNFRSF12A, SRF, MAP1B                                                     |
| SRF, ANKRD1, CRY1                                                         |
| PRKCI, ACTN1, RAB13, MYH9, ACTN4, MPP5, MYL12A                            |
| PRKCI, ACTN1, STXBP1, MYH9, IQGAP1, MPP5, CALM2                           |
| PRKCI, HIP1, PSD3, MYOF, PLA2G7                                           |
| NCF2, ACTN1, ACTN4, MYL12A                                                |
| STXBP1, RAB13, EMP2                                                       |
| RAB13, ACTN4, MPP5                                                        |
| STXBP1, ACTN4, CALM2                                                      |
| HIP1, ACTN1, MYH9, ACTN4, PKNOX2                                          |
| DOCK4, NCF2, IQGAP1                                                       |
| STXBP1, FNDC3B, MYH9, ACTN4, PARP12                                       |
| STXBP1, RAB13, S100A13, MYH9, ACTN4                                       |
| HIP1, PRMT2, STAT1, ACTN1, S100A13, MYH9, ACTN4                           |
| MLKL, RARB, ACTN4, IQGAP1, CD2AP                                          |
| BTG2, PRKCI, STAT1                                                        |
| HIP1, STXBP1, ATP1B2                                                      |
| ANXA3, ACTN1, S100A13, SVEP1, ACTN4, CALM2, MYL12A                        |
| CREB3L1, HIVEP2, ATF3, FOSL2                                              |
| SRF, HIVEP2, FOSL2                                                        |
| CREB3L1, KIF5B, ARNTL                                                     |
| TUBB2B, EHD4, IRGM2, RRAS2                                                |
| PROS1, F2R                                                                |
| H2-Q6, H2-Q4                                                              |
| H2-Q6, H2-Q4                                                              |
| H2-Q6, H2-Q4                                                              |
| F2R, RRAS2, CYR61                                                         |
| H2-Q6, H2-Q4                                                              |
| TNFRSF12A, SPECC1L, EMILIN1, CYR61                                        |
| CRB2, NXN, SPEG                                                           |
| HTRA1, PLAT, PCSK6, RHBDL3                                                |
| COL1A2, COL4A3, COL4A5                                                    |
| FOXC1, SULF1, VEGFA                                                       |
| MAN1A2, MGAT5, MGAT5B                                                     |
| MTCL1, MAPT, LMX1B                                                        |
| NPHS1, COL4A3, SULF1                                                      |
| FOXC2, ZFP423, GBX1, WT1, E2F1, SOX8, FOXL1, LMX1B, MAFA                  |
| FOXC2, WT1, PTPRO                                                         |
| FOXC2, ZFP423, BAMBI, WT1, E2F1, SOX8, MAFA                               |
| GLP1R, PAK1, NPR1, PDE4B, ADCY5                                           |
| KCNF1, KCNG2, C1QTNF7, KCTD11                                             |
| FOXC2, ZFP423, GBX1, WT1, TOP1MT, BHLHE41, E2F1, SOX8, FOXL1, LMX1B, MAFA |
| GLP1R, FOXC2, WT1, E2F1, SOX8, LMX1B, MAFA, ZBTB7C, DDN                   |
| HS3ST3A1, CHST1, HS3ST6                                                   |
| GLP1R, KSR1, ADCY5                                                        |
| COL1A2, COL4A3, COL4A5                                                    |
| FOXC1, SULF1, VEGFA                                                       |
| FOXC1, COL4A3, VASH1, SULF1                                               |
| COL1A2, COL4A3, COL4A5                                                    |
| COL1A2, COL4A3, COL4A5, VEGFA                                             |
| FOXC2, WT1, PTPRO                                                         |
| FOXC2, BAMBI, WT1, E2F1, SOX8, MAFA                                       |
| GLP1R, FOXC2, WT1, E2F1, SOX8, MAFA, ZBTB7C                               |
| PAK1, KSR1, NPR1, TRIB2, MYLK3                                            |
| FOXC2, GBX1, WT1, E2F1, SOX8, MAFA                                        |
| PAK1, KSR1, NPR1, UBE2QL1, NOD1, TRIB2, MYLK3                             |

|                          |
|--------------------------|
| GLP1R, PAK1, NPR1, PDE4B |
| PAK1, NPR1, E2F1, TNS2   |
| WT1, SOX8                |
| LMX1B, ADCY5             |
